# Supplementary material for: Iron–iodine co-catalysis towards tandem C–N/C–C bond formation: one-pot regioselective synthesis of 2-amino-3-alkylindoles
Source: Royal Society of Chemistry journal article supplement (doi:10.1039/d2qo01329k), 2022-01-01

# Electronic Supporting Information

## Iron-iodine co-catalysis towards tandem C–N/C–C bond formation: one-pot regioselective synthesis of 2-amino-3-alkylindoles

Yingying Zhang,<sup>a</sup> Yating Huang,<sup>a</sup> Kewei Yu,<sup>a</sup> Xiaoxiang Zhang,<sup>a</sup> Wenhua Yu,<sup>a</sup> Jiale Tang,<sup>a</sup> Yiran Tian,<sup>a</sup> Wanxing Wei,<sup>a</sup> Zhuan Zhang,<sup>\*,a,b</sup> and Taoyuan Liang<sup>\*,a,b</sup>

<sup>a</sup> School of Chemistry and Chemical Engineering, Guangxi University, Nanning, Guangxi 530004, P. R. China.

<sup>b</sup> Guangxi Key Laboratory of Electrochemical Energy Materials, Nanning, Guangxi 530004, P. R. China

\*E-mail: zhuan.zhang@gxu.edu.cn (Z. Zhang), taoyuanliang@gxu.edu.cn (T. Liang)

### Table of contents

|                                                         |         |
|---------------------------------------------------------|---------|
| 1. General information.                                 | S2      |
| 2. Substrates preparation.                              | S3-S4   |
| 3. Optimization of reaction conditions.                 | S4-S6   |
| 4. Typical procedure for the synthesis of <b>4aaa</b> . | S6-S7   |
| 5. Synthetic utility.                                   | S7-S8   |
| 6. Control experiments.                                 | S8-S9   |
| 7. Single crystal X-ray diffraction of <b>4aaa</b> .    | S9-S15  |
| 8. References.                                          | S15     |
| 9. Analytical data of the obtained compounds.           | S16-S32 |
| 10. NMR spectra of the obtained compounds.              | S33-S73 |

## 1. General information.

All the obtained products were characterized by melting points (m.p.),  $^1\text{H-NMR}$ ,  $^{13}\text{C-NMR}$ . Melting points were measured on an Electrothermal SGW-X4 microscopy digital melting point apparatus and are uncorrected;  $^1\text{H-NMR}$  and  $^{13}\text{C-NMR}$  spectra were obtained on Bruker-400/500 and referenced to 7.26 ppm for chloroform solvent with TMS as internal standard (0 ppm). Chemical shifts were reported in parts per million (ppm,  $\delta$ ) downfield from tetramethylsilane. Proton coupling patterns are described as singlet (s), doublet (d), triplet (t), multiplet (m); TLC was performed using commercially prepared 100-400 mesh silica gel plates (GF254), and visualization effected at 254 nm; Unless otherwise stated, all the reagents were purchased from commercial sources, used without further purification.

All the reagents were purchased from Bide Pharmatech Ltd. and Energy Chemical. All solvents were purchased from Greagent (Shanghai Titansci incorporated company) and used without further purification. All reactions were heated by metal sand bath (WATTCAS, LAB-500, <https://www.wattcas.com>). Column chromatography was performed on silica gel or natural alumina (200-300 mesh). Reactions were monitored by using thin layer chromatography (TLC) (Qingdao Jiyida silica gel reagent factory GF254)

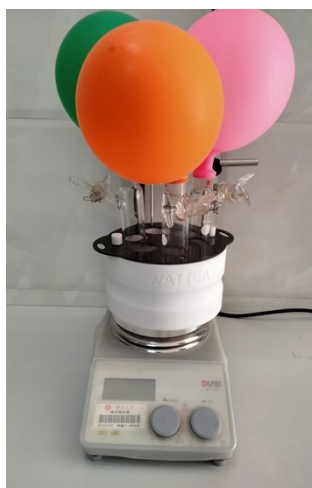

**Figure S1.** Metal sand bath (WATTCAS, LAB-500)

## 2. Substrates preparation.

### General Procedure for the preparation of substituted xanthenes (2b-2i)<sup>1</sup>:

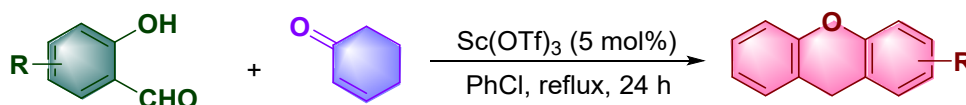

R = CH<sub>3</sub>, Cl, Br etc.

Salicylaldehyde derivatives (1.1 mmol) and 2-cyclohexene-1-one (1.0 mmol) was quickly added to a suspension of scandium (III) triflate (0.05 mmol) in chlorobenzene (4.0 mL). The reaction mixture was refluxed for 24 hours and allowed to cool to room temperature. DCM (20.0 mL) and saturated aqueous NaHCO<sub>3</sub> (20.0 mL) were added to the reaction mixture and the two layers separated. The aqueous phase was extracted with DCM (3×20.0 mL) and the combined organic layers were dried over MgSO<sub>4</sub>, filtered and solvent was removed by rotary evaporator. The crude xanthene products **2** was purified by column chromatography on silica gel using eluent mixtures of hexane and ethyl acetate.

### General Procedure for the preparation of *N*-substituted indole derivatives (1a-1d, 1f-1r)<sup>2</sup>:

Procedure for 5-chloro-1-methyl-1*H*-indole (**1k**): To a suspended solution of NaH (0.55 g, 65% dispersion in mineral oil, 15.0 mmol) in DMF (5.0 mL), 5-chloro-1*H*-indole (1.51 g, 10.0 mmol) in DMF (5.0 mL) was added dropwise at 0 °C. The heterogeneous mixture was stirred at 0 °C for 15 min and 1 h at room temperature. The mixture was then cooled to 0 °C, treated with iodomethane (0.83 mL, 13.0 mmol), and allowed to warm to room temperature. After 30 min, the reaction mixture was cooled to 0 °C, quenched with saturated NH<sub>4</sub>Cl (20.0 mL), and extracted with ether (3 × 20.0 mL). The organic layers were combined, washed with brine, dried over anhydrous Na<sub>2</sub>SO<sub>4</sub> and concentrated in vacuo. The resulting oil was purified by column chromatography on silica gel (petroleum ether) afforded **1k** as a yellow oil. Similarly, the other *N*-substituted indole derivatives were prepared from their corresponding indoles and halides.

### General procedure for the synthesis of 2-(4-(trifluoromethyl)phenyl)-1,2,3,4-

### tetrahydroisoquinoline (**2j**)<sup>3</sup>:

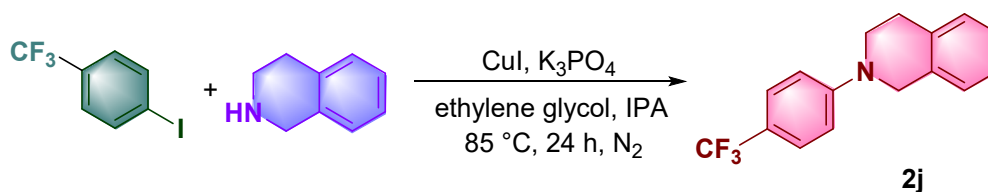

Copper(I) iodide (200 mg, 1.0 mmol) and potassium phosphate (4.25 g, 20.0 mmol) were added to an over-dried 50 mL three-neck flask. The flask was evacuated and back filled with Ar. 2-Propanol (10.0 mL), ethylene glycol (1.11 mL), 1,2,3,4-tetrahydroisoquinoline (2.0 mL, 15 mmol) and 1-iodo-4-(trifluoromethyl)benzene (10.0 mmol) were added successively by syringe at roomtemperature. The reaction mixture was heated at 85 °C and kept for 24 h and then allowed to cool to room temperature. Diethyl ether (20 mL) and water (20 mL) were then added to the reaction mixture. The organic layer was extracted with diethyl ether (2 × 20 mL). The combined organic phases were washed with brine and dried over sodium sulfate. The solvent was removed and the residue was purified by column chromatography on silica gel using ethylacetate/petroleum ether (1:20) as an eluent to afford the desired product **2j**.

### 3. Optimization of reaction conditions.

Table S1. Screening of solvent.<sup>a</sup>

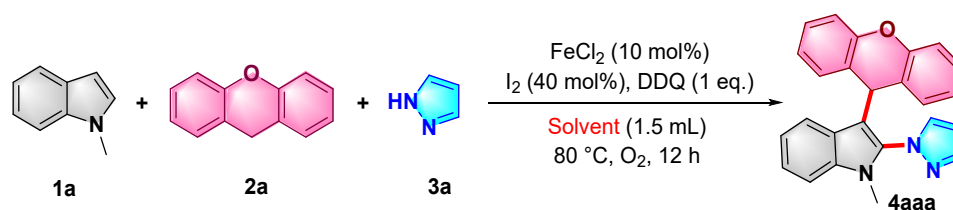

| Entry    | Catalyst                | Solvent <sup>b</sup>           | Oxidant    | Yield(%) <sup>c</sup> |
|----------|-------------------------|--------------------------------|------------|-----------------------|
| 1        | FeCl <sub>2</sub>       | CH <sub>3</sub> CN             | DDQ        | 46                    |
| 2        | FeCl <sub>2</sub>       | DCE                            | DDQ        | 58                    |
| 3        | FeCl <sub>2</sub>       | DMF                            | DDQ        | trace                 |
| 4        | FeCl <sub>2</sub>       | toluene                        | DDQ        | 53                    |
| 5        | FeCl <sub>2</sub>       | 1,4-dioxane                    | DDQ        | 77                    |
| <b>6</b> | <b>FeCl<sub>2</sub></b> | <b>1,4-dioxane/DCE</b>         | <b>DDQ</b> | <b>89</b>             |
| 7        | FeCl <sub>2</sub>       | 1,4-dioxane/CH <sub>3</sub> CN | DDQ        | 57                    |

|   |                   |                     |     |                       |
|---|-------------------|---------------------|-----|-----------------------|
| 8 | FeCl <sub>2</sub> | 1,4-dioxane/toluene | DDQ | 44                    |
| 9 | FeCl <sub>2</sub> | 1,4-dioxane/DCE     | DDQ | (46, 60) <sup>d</sup> |

<sup>a</sup>Conditions: unless otherwise stated, all the reactions were performed with **1a** (0.25 mmol), **2a** (0.25 mmol) and **3a** (0.75 mmol), FeCl<sub>2</sub> (10 mol%), DDQ (1.0 eq), iodine (40 mol%), 1,4-dioxane/DCE (v/v = 2:1, 1.5 mL) at 80 °C under O<sub>2</sub> for 12 h; <sup>b</sup>(v/v = 2:1); <sup>c</sup>Isolated yield; <sup>d</sup>1,4-dioxane/DCE (v/v = 1:1) and (v/v = 1:2).

**Table S2. Screening of catalyst. <sup>a</sup>**

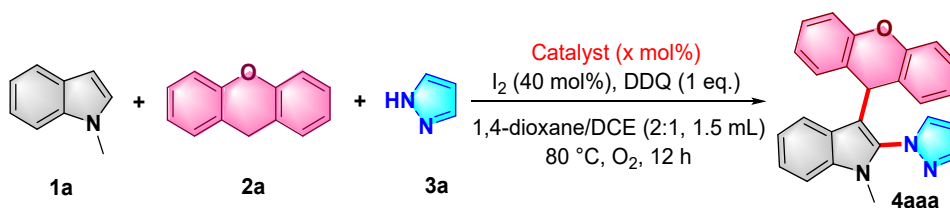

| Entry | Catalyst <sup>c</sup> | Solvent         | Oxidant | Yield(%) <sup>b</sup> |
|-------|-----------------------|-----------------|---------|-----------------------|
| 1     | FeCl <sub>3</sub>     | 1,4-dioxane/DCE | DDQ     | 75                    |
| 2     | CuCl <sub>2</sub>     | 1,4-dioxane/DCE | DDQ     | 61                    |
| 3     | ZnCl <sub>2</sub>     | 1,4-dioxane/DCE | DDQ     | 61                    |
| 4     | Fe(OTf) <sub>3</sub>  | 1,4-dioxane/DCE | DDQ     | 59                    |
| 5     | None                  | 1,4-dioxane/DCE | DDQ     | 61                    |
| 6     | FeCl <sub>2</sub>     | 1,4-dioxane/DCE | DDQ     | (71, 68) <sup>d</sup> |

<sup>a</sup>Conditions: unless otherwise stated, all the reactions were performed with **1a** (0.25 mmol), **2a** (0.25 mmol) and **3a** (0.75 mmol), FeCl<sub>2</sub> (10 mol%), DDQ (1.0 eq), iodine (40 mol%), 1,4-dioxane/DCE (v/v = 2:1, 1.5 mL) at 80 °C under O<sub>2</sub> for 12 h; <sup>b</sup>Isolated yield; <sup>c</sup>catalyst (10 mol%); <sup>d</sup>5 mol% and 20 mol% of FeCl<sub>2</sub> were used, respectively.

**Table S3. Screening of oxidant. <sup>a</sup>**

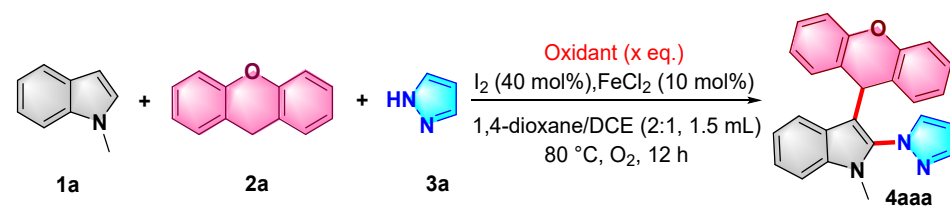

| Entry | Catalyst          | Solvent         | Oxidant                                      | Yield(%) <sup>b</sup> |
|-------|-------------------|-----------------|----------------------------------------------|-----------------------|
| 1     | FeCl <sub>2</sub> | 1,4-dioxane/DCE | TBHP                                         | 46                    |
| 2     | FeCl <sub>2</sub> | 1,4-dioxane/DCE | K <sub>2</sub> S <sub>2</sub> O <sub>8</sub> | 35                    |
| 3     | FeCl <sub>2</sub> | 1,4-dioxane/DCE | DTBP                                         | 19                    |
| 4     | FeCl <sub>2</sub> | 1,4-dioxane/DCE | NFSI                                         | ND                    |
| 5     | FeCl <sub>2</sub> | 1,4-dioxane/DCE | DDQ                                          | (44, 25) <sup>c</sup> |

<sup>a</sup>Conditions: unless otherwise stated, all the reactions were performed with **1a** (0.25 mmol), **2a** (0.25 mmol) and **3a** (0.75 mmol), FeCl<sub>2</sub> (10 mol%), DDQ (1.0 eq), iodine (40 mol%), 1,4-dioxane/DCE (v/v = 2:1, 1.5 mL) at 80 °C

under O<sub>2</sub> for 12 h; <sup>b</sup>Isolated yield; <sup>c</sup>0.5 equiv and 1.5 equiv of DDQ were used, respectively.

**Table S4. The effect of usage amount of 3a.<sup>a</sup>**

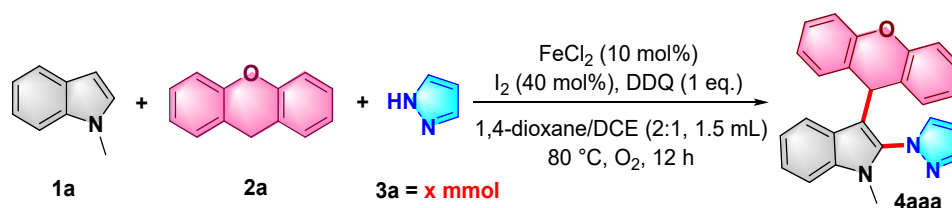

| Entry | Usage amount of 3a | Yield(%) <sup>b</sup> |
|-------|--------------------|-----------------------|
| 1     | 0.25 mmol          | 30                    |
| 2     | 0.375 mmol         | 45                    |
| 3     | 0.50mmol           | 51                    |

<sup>a</sup>Conditions: unless otherwise stated, all the reactions were performed with **1a** (0.25 mmol), **2a** (0.25 mmol) and **3a** (0.75 mmol), FeCl<sub>2</sub> (10 mol%), DDQ (1.0 eq), iodine (40 mol%), 1,4-dioxane/DCE (v/v = 2:1, 1.5 mL) at 80 °C under O<sub>2</sub> for 12 h; <sup>b</sup>Isolated yield.

**Table S5. Others supplementary screening.<sup>a</sup>**

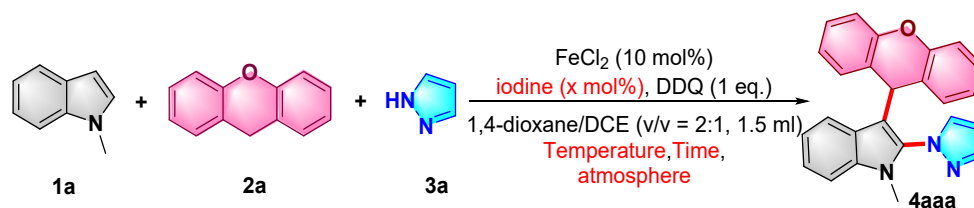

| Entry | Catalyst          | Solvent         | Oxidant | Yield(%) <sup>b</sup> |
|-------|-------------------|-----------------|---------|-----------------------|
| 1     | FeCl <sub>2</sub> | 1,4-dioxane/DCE | DDQ     | (66, ND) <sup>c</sup> |
| 2     | FeCl <sub>2</sub> | 1,4-dioxane/DCE | DDQ     | (61, 64) <sup>d</sup> |
| 3     | FeCl <sub>2</sub> | 1,4-dioxane/DCE | DDQ     | 34 <sup>e</sup>       |
| 4     | FeCl <sub>2</sub> | 1,4-dioxane/DCE | DDQ     | (55, 37) <sup>f</sup> |

<sup>a</sup>Conditions: unless otherwise stated, all the reactions were performed with **1a** (0.25 mmol), **2a** (0.25 mmol) and **3a** (0.75 mmol), FeCl<sub>2</sub> (10 mol%), DDQ (1.0 eq), iodine (40 mol%), 1,4-dioxane/DCE (v/v = 2:1, 1.5 mL) at 80 °C under O<sub>2</sub> for 12 h; <sup>b</sup>Isolated yield; <sup>c</sup>20 mol% of I<sub>2</sub> was used, 40 mol% of NaI was used; <sup>d</sup>for 9 h and 24 h; <sup>e</sup>at 60 °C; <sup>f</sup>under air and argon atmosphere conditions, respectively.

#### 4. Typical procedure for the synthesis of 4aaa.

The mixture of 1-methyl-1*H*-indole **1a** (33.0 mg, 0.25 mmol), 9*H*-xanthene **2a** (45.0

mg, 0.25 mmol), pyrazole **3a** (51.0 mg, 0.75 mmol), DDQ (56.0 mg, 0.25 mmol), FeCl<sub>2</sub> (3.0 mg, 10 mol%), iodine (25.0 mg, 40 mol%) in 1,4-dioxane/DCE (v/v = 2:1, 1.5 mL) was stirred at 80 °C under O<sub>2</sub> for 12 h. The resulting mixture was concentrated by removing the solvent under vacuum, and the residue was purified by preparative TLC on silica gel by using petroleum ether/ethyl acetate (20 :1) as the eluent to give **4aaa** as a yellow solid (84.0 mg, 89% yield).

#### Scheme S1. Substrates employed of xanthene.

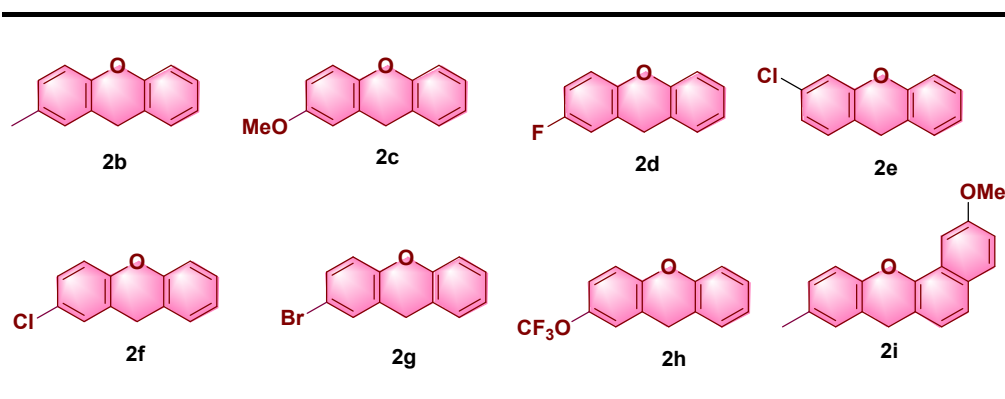

#### Scheme S2. Substrates employed of indoles.

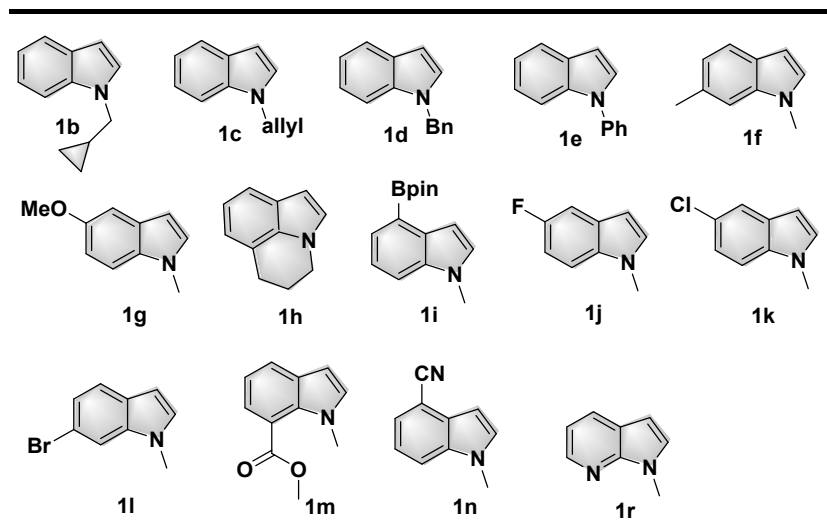

#### 5. Synthetic utility.

The mixture of 5*H*-pyrrolo[3,2-*d*]pyrimidine (29.0 mg), 9*H*-xanthene (45.0 mg, 0.25 mmol) and 1*H*-pyrazole (51.0 mg, 0.75 mmol), DDQ (56.0 mg, 0.25 mmol), FeCl<sub>2</sub> (3.0 mg, 5 mol%) and I<sub>2</sub> (25.0 mg, 40 mol%) in 1,4-dioxane/DCE (v/v = 2:1) was stirred at 80 °C for 12 h under O<sub>2</sub>. The resulting mixture was concentrated by removing the

solvent under vacuum, and the residue was purified by preparative TLC on silica gel by using petroleum ether/ethyl acetate (v/v = 20:1) as the eluent to give **4saa** as yellow solid. <sup>a</sup>Yield of standard conditions deviation: 2.0 equiv of xanthenone **2a** was used.

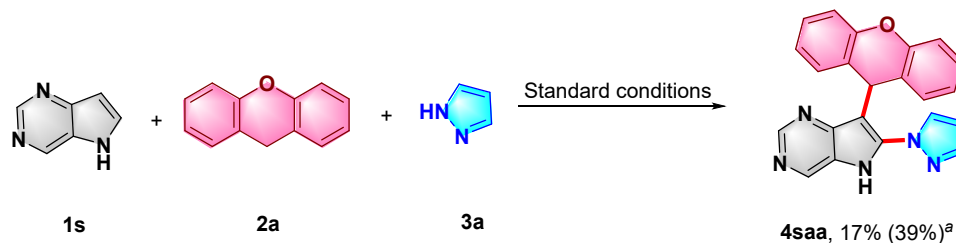

The mixture of 1-methyl-1*H*-indole (33.0 mg), 2-(4-(trifluoromethyl)phenyl)-1,2,3,4-tetrahydroisoquinoline (69.0 mg, 0.25 mmol) and 1*H*-pyrazole (51.0 mg, 0.75 mmol), DDQ (56.0 mg, 0.25 mmol), FeCl<sub>2</sub> (3.0 mg, 5 mol%) and I<sub>2</sub> (25.0 mg, 40 mol%) in 1,4-dioxane/DCE (v/v = 2:1) was stirred at 80 °C for 12 h under O<sub>2</sub>. The resulting mixture was concentrated by removing the solvent under vacuum, and the residue was purified by preparative TLC on silica gel by using petroleum ether/ethyl acetate (v/v = 20:1) as the eluent to give **4aja** as yellow solid. <sup>a</sup>Yield of standard conditions deviation: DDQ was replaced by 2.0 equivalent of TBHP (49.5 mg, 0.50 mmol) and the solvent was replaced by 1.5 mL of 1,4-dioxane, respectively.

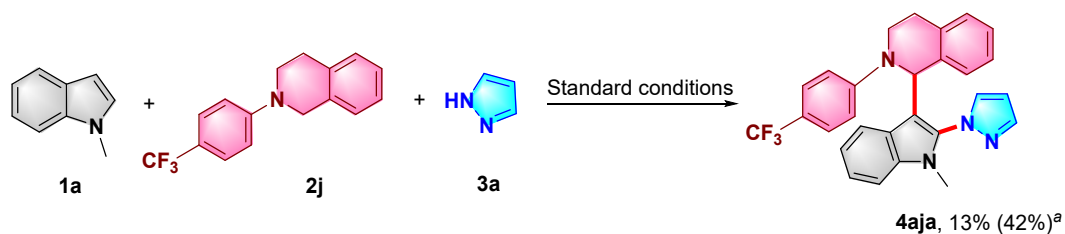

## 6. Control experiments.

(1) Under the optimized reaction conditions, the model reaction was carried out by introducing 3.0 equivalent of TEMPO (2,2,6,6-tetramethyl-1-piperidinyloxy). And no **4aaa** was detected.

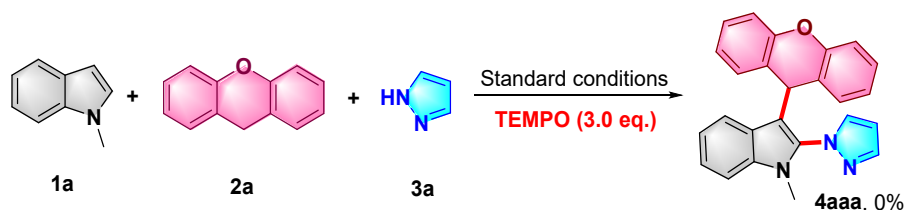



(2) Under the optimized reaction conditions, the reaction of **1a** (33.0 mg, 0.25 mmol) and **2a** (45.0 mg, 0.25 mmol) was carried. Then, the reaction mixture was purified by preparative TLC on silica eluting with petroleum ether/ethyl acetate (v/v = 20:1) to give product **1a-1** as yellow solid (13.0 mg, 16% yield) and product **1a-1** as yellow solid.

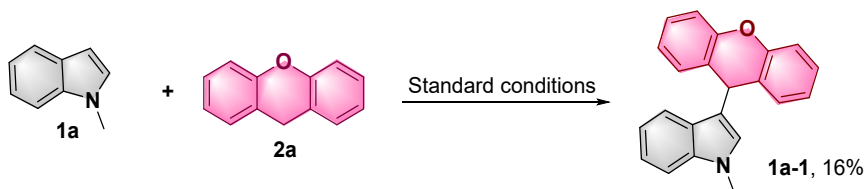

(3) Under the optimized reaction conditions, the reaction of **1a** (33.0 mg, 0.25 mmol) and **3a** (51.0 mg, 0.75 mmol) was carried. Then, the reaction mixture was purified by preparative TLC on silica eluting with petroleum ether/ethyl acetate (v/v = 20:1) to give product **1a-2** as white solid (17.0 mg, 35% yield).

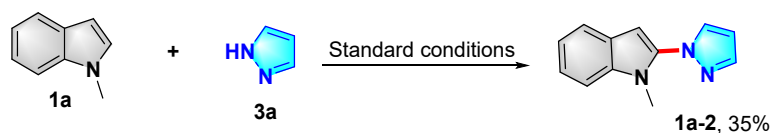

(4) Under the optimized reaction conditions, the reaction of **1a-1** (77.7 mg, 0.25 mmol) and **3a** (51.0 mg, 0.75 mmol) was carried out. And no **4aaa** was detected.

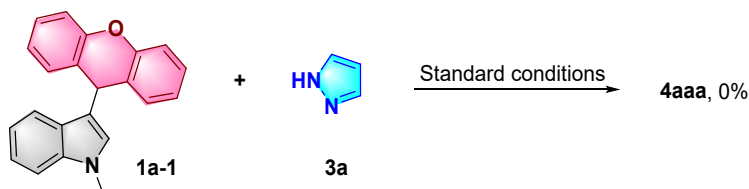

(5) Under the optimized reaction conditions, the reaction of **1a-2** (49.0 mg, 0.25 mmol) and **2a** (45.0 mg, 0.25 mmol) was carried. Then, the reaction mixture was purified by preparative TLC on silica eluting with petroleum ether/ethyl acetate (v/v = 20:1) to give product **4aaa** as yellow solid (80.5 mg, 85% yield).

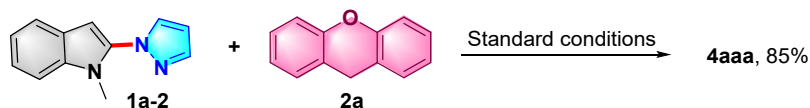

## 7. Single crystal X-ray diffraction of **4aaa**.

White block-like single crystals of **4aaa** were grown by layering a dichloromethane solution with methanol at ambient temperature. X-Ray diffraction data of one these

crystals were collected on a R-AXIS SPIDER diffractometer. The measurements were performed with Mo-K $\alpha$  radiation ( $\lambda = 0.71073 \text{ \AA}$ ). Data were collected at 298(2) K, using the  $\omega$ - and  $\varphi$ - scans to a maximum  $\theta$  value of 28.327°. The data were refined by full-matrix least-squares techniques on  $F^2$  with SHELXL-2018/3. And the structures were solved by direct methods SHELXL-2018/3. All the non-hydrogen atoms were refined anisotropically. The hydrogen atoms were included at geometrically idealized positions. And an ORTEP representation of the structure is shown below.

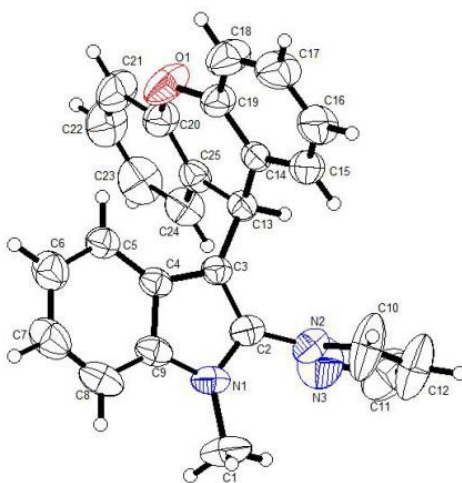

**Figure S2.** ORTEP drawing of **4aaa** with the numbering scheme.

**Table S2.** Crystal data and structure refinement for **4aaa**.

|                      |                               |                                |
|----------------------|-------------------------------|--------------------------------|
| Identification code  | 4aaa                          |                                |
| Empirical formula    | $C_{25}H_{19}N_3O_1$          |                                |
| Formula weight       | 377.43                        |                                |
| Temperature          | 298 K                         |                                |
| Crystal system       | Monoclinic                    |                                |
| Space group          | $C2/c$                        |                                |
| Unit cell dimensions | $a = 18.6523(15) \text{ \AA}$ | $\square = 90^\circ$ .         |
|                      | $b = 8.3706(5) \text{ \AA}$   | $\square = 104.543(8)^\circ$ . |
|                      | $c = 25.8377(19) \text{ \AA}$ | $\square = 90^\circ$ .         |
| Volume               | $3904.8(5) \text{ \AA}^3$     |                                |
| Z                    | 8                             |                                |
| $\rho_{\text{calc}}$ | $1.284 \text{ cm}^3$          |                                |
| $\mu$                | $0.080 \text{ mm}^{-1}$       |                                |
| F(000)               | 1584.0                        |                                |

|                                         |                                                                        |
|-----------------------------------------|------------------------------------------------------------------------|
| Crystal size                            | 0.3 × 0.2 × 0.1 mm <sup>3</sup>                                        |
| Radiation                               | MoK $\alpha$ ( $\lambda$ = 0.71073)                                    |
| 2 $\theta$ range for data collection    | 7.632 to 58.912                                                        |
| Index ranges                            | -24 $\leq$ h $\leq$ 24, -11 $\leq$ k $\leq$ 10, -33 $\leq$ l $\leq$ 35 |
| Reflections collected                   | 14957                                                                  |
| Independent reflections                 | 4646 [Rint = 0.0286, Rsigma = 0.0308]                                  |
| Data / restraints / parameters          | 4646/0/264                                                             |
| Goodness-of-fit on F <sup>2</sup>       | 1.032                                                                  |
| Final R indices [ $I \geq 2\sigma(I)$ ] | R1 = 0.0580, wR2 = 0.1369                                              |
| Final R indices (all data)              | R1 = 0.0863, wR2 = 0.1555                                              |
| Largest diff. peak and hole             | 0.20/-0.18 Å <sup>-3</sup>                                             |

**Table S3.** Fractional Atomic Coordinates ( $\times 10^4$ ) and Equivalent Isotropic Displacement Parameters ( $\text{\AA}^2 \times 10^3$ ) for **4aaa**. U(eq) is defined as 1/3 of of the trace of the orthogonalised U<sup>ij</sup> tensor.

| Atom | x          | y           | z          | U(eq)     |
|------|------------|-------------|------------|-----------|
| O1   | 9149.4(8)  | 6735.4(17)  | 4794.8(7)  | 78.0(5)   |
| N1   | 7104.1(8)  | 10054.3(17) | 2924.0(6)  | 49.5(4)   |
| N2   | 6269.5(8)  | 9299.8(18)  | 3456.6(6)  | 51.0(4)   |
| N3   | 5777.3(12) | 8128(3)     | 3288.8(10) | 90.5(7)   |
| C1   | 6553.8(13) | 10784(3)    | 2488.8(9)  | 82.3(7)   |
| C2   | 6980.9(9)  | 9288.6(19)  | 3366.3(7)  | 43.7(4)   |
| C3   | 7613.8(9)  | 8665.0(18)  | 3678.3(6)  | 38.3(4)   |
| C4   | 8182.4(9)  | 9068.0(18)  | 3418.5(6)  | 39.8(4)   |
| C5   | 8944.4(10) | 8811(2)     | 3533.2(7)  | 48.6(4)   |
| C6   | 9335.8(11) | 9398(3)     | 3190.0(8)  | 63.2(5)   |
| C7   | 8990.2(13) | 10263(3)    | 2735.8(9)  | 70.5(6)   |
| C8   | 8249.8(13) | 10546(2)    | 2612.2(8)  | 63.1(6)   |
| C9   | 7844.7(10) | 9935(2)     | 2951.9(6)  | 45.8(4)   |
| C10  | 5991.3(14) | 10458(3)    | 3697.3(15) | 103.9(11) |
| C11  | 5290.1(17) | 10030(4)    | 3674.7(17) | 115.7(12) |
| C12  | 5178.7(14) | 8619(4)     | 3438.7(14) | 100.5(10) |
| C13  | 7689.3(9)  | 7759.7(19)  | 4195.7(6)  | 40.1(4)   |
| C14  | 8161.0(9)  | 8663.6(19)  | 4663.1(6)  | 40.4(4)   |
| C15  | 7921.9(12) | 10084(2)    | 4833.7(7)  | 57.3(5)   |
| C16  | 8361.0(14) | 10966(3)    | 5239.7(8)  | 71.4(6)   |

|     |            |            |            |         |
|-----|------------|------------|------------|---------|
| C17 | 9053.1(14) | 10436(3)   | 5488.3(9)  | 75.7(7) |
| C18 | 9300.2(13) | 9020(3)    | 5335.1(9)  | 74.7(7) |
| C19 | 8853.0(10) | 8145(2)    | 4927.4(7)  | 52.6(5) |
| C20 | 8688.0(11) | 5681(2)    | 4458.1(8)  | 53.5(5) |
| C21 | 8977.2(13) | 4165(2)    | 4425.9(10) | 71.6(6) |
| C22 | 8569.9(14) | 3068(3)    | 4089.3(10) | 75.4(7) |
| C23 | 7880.4(15) | 3448(2)    | 3789.4(10) | 73.9(7) |
| C24 | 7592.8(12) | 4950(2)    | 3828.3(8)  | 58.5(5) |
| C25 | 7998.2(10) | 6098.2(19) | 4161.1(7)  | 42.6(4) |

**Table S4.** Anisotropic Displacement Parameters ( $\text{\AA}^2 \times 10^3$ ) for **4aaa**. The Anisotropic displacement factor exponent takes the form:  $-2\pi^2[h^2a^2U_{11}+2hka*b*U_{12}+\dots]$ .

| Atom | $U_{11}$ | $U_{22}$ | $U_{33}$  | $U_{23}$  | $U_{13}$  | $U_{12}$  |
|------|----------|----------|-----------|-----------|-----------|-----------|
| O1   | 61.6(9)  | 62.2(9)  | 93.4(11)  | -24.6(8)  | -12.0(8)  | 24.1(7)   |
| N1   | 57.3(9)  | 44.1(8)  | 39.8(8)   | 6.0(6)    | -1.4(6)   | 3.2(7)    |
| N2   | 42.1(8)  | 45.6(8)  | 60.3(9)   | -5.2(7)   | 3.6(7)    | 3.9(6)    |
| N3   | 75.0(13) | 86.0(15) | 110.5(17) | -22.2(13) | 23.1(12)  | -24.2(11) |
| C1   | 75.9(15) | 86.4(17) | 68.3(14)  | 29.7(13)  | -12.5(12) | 9.2(13)   |
| C2   | 47.2(9)  | 36.9(8)  | 42.5(9)   | -3.0(7)   | 3.1(7)    | 1.8(7)    |
| C3   | 45.0(8)  | 34.3(8)  | 34.0(8)   | -2.6(7)   | 6.9(6)    | 2.6(7)    |
| C4   | 49.8(9)  | 35.5(8)  | 32.2(7)   | -3.8(7)   | 6.9(7)    | -1.9(7)   |
| C5   | 48.4(9)  | 54.8(10) | 41.5(9)   | -0.7(8)   | 9.2(7)    | -0.6(8)   |
| C6   | 53.6(11) | 80.2(14) | 58.6(12)  | -0.9(11)  | 19.1(9)   | -10.5(10) |
| C7   | 74.7(15) | 84.9(16) | 56.5(12)  | 4.4(12)   | 25.4(11)  | -22.7(12) |
| C8   | 86.6(15) | 59.1(12) | 42.0(10)  | 8.5(9)    | 13.1(10)  | -13.2(11) |
| C9   | 58.7(11) | 39.4(9)  | 35.4(8)   | -1.8(7)   | 4.6(7)    | -3.5(8)   |
| C10  | 72.8(16) | 65.5(15) | 189(3)    | -46.6(18) | 62.5(19)  | -1.3(12)  |
| C11  | 81.3(19) | 86(2)    | 199(4)    | -9(2)     | 71(2)     | 21.9(16)  |
| C12  | 54.6(14) | 103(2)   | 140(3)    | 6(2)      | 16.8(16)  | -10.3(14) |
| C13  | 42.6(8)  | 42.2(8)  | 37.4(8)   | 3.6(7)    | 13.8(7)   | 3.0(7)    |
| C14  | 49.4(9)  | 40.8(8)  | 33.2(8)   | 3.0(7)    | 14.4(7)   | 6.6(7)    |
| C15  | 68.3(12) | 55.6(11) | 45.9(10)  | -3.8(9)   | 10.7(9)   | 18.5(9)   |
| C16  | 96.9(17) | 59.7(12) | 54.3(12)  | -17.5(10) | 12.6(12)  | 18.3(12)  |
| C17  | 90.7(17) | 72.4(15) | 52.8(12)  | -19.7(11) | -2.8(11)  | 6.8(13)   |
| C18  | 67.5(13) | 74.5(15) | 67.2(13)  | -15.6(12) | -11.2(11) | 15.8(11)  |

|     |          |          |          |           |          |           |
|-----|----------|----------|----------|-----------|----------|-----------|
| C19 | 56.3(11) | 49.3(10) | 47.8(10) | -5.4(8)   | 4.6(8)   | 11.1(8)   |
| C20 | 59.4(11) | 42.3(9)  | 57.7(11) | -2.0(9)   | 12.4(9)  | 8.9(8)    |
| C21 | 74.7(14) | 50.1(11) | 87.4(16) | -2.8(11)  | 15.8(12) | 18.8(11)  |
| C22 | 94.6(18) | 40.8(11) | 95.5(18) | -6.4(11)  | 32.5(15) | 7.6(11)   |
| C23 | 96.3(18) | 45.4(11) | 82.4(16) | -16.3(11) | 26.7(14) | -14.6(11) |
| C24 | 69.5(13) | 49.6(10) | 56.4(11) | -2.6(9)   | 15.8(10) | -5.8(9)   |
| C25 | 54.6(10) | 36.9(8)  | 39.7(8)  | 3.9(7)    | 17.9(7)  | -0.2(7)   |

**Table S5.** Bond Angles for **4aaa**.

| Atom | Atom | Atom | Angle/°    | Atom | Atom | Atom | Angle/°    |
|------|------|------|------------|------|------|------|------------|
| C20  | O1   | C19  | 118.55(14) | C12  | C11  | C10  | 107.3(2)   |
| C2   | N1   | C1   | 127.18(18) | C11  | C12  | N3   | 111.3(2)   |
| C9   | N1   | C1   | 125.39(17) | C3   | C13  | C25  | 111.08(13) |
| C9   | N1   | C2   | 107.36(13) | C14  | C13  | C3   | 111.27(13) |
| N3   | N2   | C2   | 122.77(16) | C14  | C13  | C25  | 110.72(13) |
| C10  | N2   | N3   | 111.73(19) | C15  | C14  | C13  | 121.20(15) |
| C10  | N2   | C2   | 125.47(17) | C19  | C14  | C13  | 121.83(15) |
| C12  | N3   | N2   | 103.7(2)   | C19  | C14  | C15  | 116.94(16) |
| N1   | C2   | N2   | 119.72(15) | C16  | C15  | C14  | 121.92(18) |
| C3   | C2   | N1   | 111.73(15) | C17  | C16  | C15  | 119.84(19) |
| C3   | C2   | N2   | 128.47(16) | C16  | C17  | C18  | 119.6(2)   |
| C2   | C3   | C4   | 105.52(14) | C17  | C18  | C19  | 119.9(2)   |
| C2   | C3   | C13  | 126.33(15) | C14  | C19  | O1   | 122.16(16) |
| C4   | C3   | C13  | 128.14(14) | C14  | C19  | C18  | 121.72(17) |
| C5   | C4   | C3   | 134.45(15) | C18  | C19  | O1   | 116.11(17) |
| C5   | C4   | C9   | 118.24(16) | O1   | C20  | C21  | 115.62(17) |
| C9   | C4   | C3   | 107.30(15) | C25  | C20  | O1   | 122.73(16) |
| C6   | C5   | C4   | 119.12(17) | C25  | C20  | C21  | 121.63(19) |
| C5   | C6   | C7   | 121.5(2)   | C22  | C21  | C20  | 119.5(2)   |
| C8   | C7   | C6   | 121.18(19) | C21  | C22  | C23  | 120.2(2)   |
| C7   | C8   | C9   | 117.93(19) | C22  | C23  | C24  | 120.0(2)   |
| N1   | C9   | C4   | 108.08(15) | C23  | C24  | C25  | 121.1(2)   |
| N1   | C9   | C8   | 129.83(17) | C20  | C25  | C13  | 121.26(15) |
| C8   | C9   | C4   | 122.06(18) | C20  | C25  | C24  | 117.54(16) |
| N2   | C10  | C11  | 106.0(2)   | C24  | C25  | C13  | 121.20(16) |

**Table S6.** Bond Lengths for **4aaa**.

| Atom | Atom | Length/Å | Atom | Atom | Length/Å |
|------|------|----------|------|------|----------|
| O1   | C19  | 1.382(2) | C8   | C9   | 1.392(3) |
| O1   | C20  | 1.379(2) | C10  | C11  | 1.343(4) |
| N1   | C1   | 1.453(2) | C11  | C12  | 1.321(4) |
| N1   | C2   | 1.379(2) | C13  | C14  | 1.507(2) |
| N1   | C9   | 1.369(2) | C13  | C25  | 1.517(2) |
| N2   | N3   | 1.339(2) | C14  | C15  | 1.380(2) |
| N2   | C2   | 1.404(2) | C14  | C19  | 1.371(2) |
| N2   | C10  | 1.326(3) | C15  | C16  | 1.373(3) |
| N3   | C12  | 1.335(3) | C16  | C17  | 1.363(3) |
| C2   | C3   | 1.356(2) | C17  | C18  | 1.366(3) |
| C3   | C4   | 1.431(2) | C18  | C19  | 1.379(3) |
| C3   | C13  | 1.512(2) | C20  | C21  | 1.389(3) |
| C4   | C5   | 1.394(2) | C20  | C25  | 1.368(3) |
| C4   | C9   | 1.412(2) | C21  | C22  | 1.359(3) |
| C5   | C6   | 1.373(3) | C22  | C23  | 1.362(3) |
| C6   | C7   | 1.392(3) | C23  | C24  | 1.381(3) |
| C7   | C8   | 1.358(3) | C24  | C25  | 1.381(3) |

**Table S7.** Hydrogen Atom Coordinates ( $\text{Å} \times 10^4$ ) and Isotropic Displacement Parameters ( $\text{Å}^2 \times 10^3$ ) for **4aaa**.

| Atom | x       | y        | z       | U(eq) |
|------|---------|----------|---------|-------|
| H1A  | 6581.04 | 10309.39 | 2155.97 | 123   |
| H1B  | 6647.79 | 11909.65 | 2479.82 | 123   |
| H1C  | 6068.83 | 10614    | 2543    | 123   |
| H5   | 9184.61 | 8249.86  | 3838.14 | 58    |
| H6   | 9842.95 | 9212.86  | 3262.65 | 76    |
| H7   | 9271.33 | 10653    | 2513.01 | 85    |
| H8   | 8020.62 | 11131.61 | 2309.96 | 76    |
| H10  | 6232.54 | 11380.07 | 3850.47 | 125   |
| H11  | 4946.71 | 10617.04 | 3801.69 | 139   |
| H12  | 4739.91 | 8042.32  | 3383.97 | 121   |
| H13  | 7193.52 | 7644.75  | 4255.66 | 48    |
| H15  | 7449.61 | 10453.86 | 4668.95 | 69    |
| H16  | 8186.86 | 11922.7  | 5344.82 | 86    |
| H17  | 9355.11 | 11035.81 | 5760.54 | 91    |
| H18  | 9769.59 | 8646.32  | 5505.76 | 90    |
| H21  | 9446.19 | 3903.57  | 4633.32 | 86    |
| H22  | 8762.36 | 2054.12  | 4063.59 | 90    |

|     |         |         |         |    |
|-----|---------|---------|---------|----|
| H23 | 7603.4  | 2695.54 | 3558.41 | 89 |
| H24 | 7118.05 | 5193.2  | 3627    | 70 |

---

## 8. Reference.

- 1 E. Böß, T. Hillringhaus, J. Nitsch and M. Klussmann, Lewis Acid-Catalysed One Pot Synthesis of Substituted Xanthenes. *Org. Biomol. Chem.*, 2011, **9**, 1744–1748.
- 2 J. Rodriguez, D. Vesseur, A. Tabey, S. Mallet-Ladeira, K. Miqueu and D. Bourissou, Au(I)/Au(III) Catalytic Allylation Involving  $\pi$ -Allyl Au(III) Complexes. *ACS Catal.*, 2022, **12**, 993–1003.
- 3 Y. Kong, J-K. Kim, Y. Li, J. Zhang, M. Huang and Y. Wu, An oxidant- and catalyst-free electrooxidative cross-coupling approach to 3-tetrahydroisoquinoline substituted coumarins. *Green Chem.*, 2021, **23**, 274–1279.

## 9. Analytic data of the obtained compounds.

### (1) 2-methoxy-9-methyl-7H-benzo[*c*]xanthene (2i)

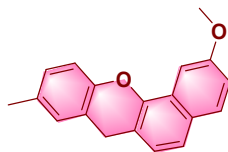

Yellow solid; m.p.: 80-83 °C; <sup>1</sup>HNMR (500 MHz, Chloroform-*d*) δ 7.70 (d, *J* = 8.9 Hz, 1H), 7.64 (d, *J* = 2.6 Hz, 1H), 7.44 (d, *J* = 8.2 Hz, 1H), 7.16 – 7.12 (m, 2H), 7.10 (d, *J* = 8.2 Hz, 1H), 7.04 (d, *J* = 10.1 Hz, 2H), 4.15 (s, 2H), 4.01 (s, 3H), 2.34 (s, 3H). <sup>13</sup>C NMR (125 MHz, CDCl<sub>3</sub>) δ 158.00, 149.87, 145.98, 132.64, 129.49, 129.27, 128.93, 128.31, 125.33, 124.40, 122.11, 120.24, 118.64, 116.43, 114.94, 100.02, 55.57, 28.36, 20.85. HRMS (ESI): Calcd. for C<sub>19</sub>H<sub>16</sub>O<sub>2</sub> [M+H]<sup>+</sup>: 277.1223; found: 277.1220.

### (2) methyl-3-(9H-xanthen-9-yl)-1H-indole (1a-1)

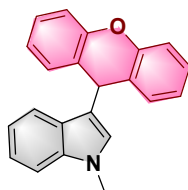

Known compounds, yellow solid, <sup>1</sup>HNMR (500 MHz, Chloroform-*d*) δ 7.42 (d, *J* = 8.0 Hz, 1H), 7.27 (d, *J* = 8.3 Hz, 2H), 7.23 – 7.13 (m, 7H), 7.18 – 7.12 (m, 6H), 7.00 (t, *J* = 7.5 Hz, 1H), 6.96 – 6.90 (m, 2H), 6.90 (s, 1H), 5.54 (s, 1H), 3.74 (s, 3H).

### (3) 1-methyl-2-(1H-pyrazol-1-yl)-1H-indole (1a-2)

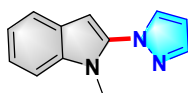

Known compounds, white solid, <sup>1</sup>HNMR (500 MHz, Chloroform-*d*) δ 7.83 (d, *J* = 1.2 Hz, 1H), 7.74 (d, *J* = 2.4 Hz, 1H), 7.64 (d, *J* = 6.9 Hz, 1H), 7.37 (d, *J* = 8.7 Hz, 1H), 7.31 (t, *J* = 7.1 Hz, 1H), 7.18 (t, *J* = 7.5 Hz, 1H), 6.53 (s, 1H), 6.49 – 6.47 (m, 1H), 3.69 (s, 3H).

### (4) 1-methyl-2-(1H-pyrazol-1-yl)-3-(9H-xanthen-9-yl)-1H-indole (4aaa)

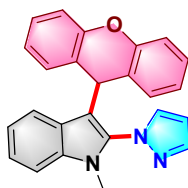



Yellow solid, (84.0 mg, 89% yield); m.p.: 226-228 °C; <sup>1</sup>HNMR (500 MHz, Chloroform-d) δ 7.86 (d, *J* = 1.9 Hz, 1H), 7.69 (d, *J* = 2.4 Hz, 1H), 7.33 (d, *J* = 8.9 Hz, 1H), 7.28 – 7.24 (m, 2H), 7.20 – 7.16 (m, 2H), 7.13 – 7.08 (m, 4H), 6.98 (t, *J* = 7.5 Hz, 1H), 6.95 – 6.90 (m, 2H), 6.52 (t, *J* = 2.2 Hz, 1H), 5.37 (s, 1H), 3.53 (s, 3H). <sup>13</sup>CNMR (125 MHz, CDCl<sub>3</sub>) δ 151.16, 142.30, 135.30, 133.18, 132.99, 129.63, 127.95, 124.20, 123.26, 123.15, 120.73, 120.32, 116.35, 113.98, 109.71, 107.23, 33.64, 29.35. HRMS (ESI): Calcd. for C<sub>25</sub>H<sub>18</sub>N<sub>3</sub>O [M+H]<sup>+</sup>: 378.1601; found: 378.1597

**(5)1-(cyclopropylmethyl)-2-(1*H*-pyrazol-1-yl)-3-(9*H*-xanthen-9-yl)-1*H*-indole**

**(4baa)**

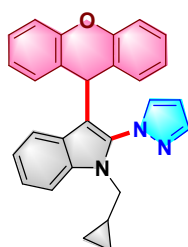

Yellow solid, (75.0 mg, 72% yield); m.p.: 192-194 °C; <sup>1</sup>HNMR (500 MHz, Chloroform-d) δ 7.86 (d, *J* = 1.9 Hz, 1H), 7.74 (d, *J* = 2.4 Hz, 1H), 7.42 (d, *J* = 8.3 Hz, 1H), 7.28 – 7.23 (m, 2H), 7.21 – 7.17 (m, 2H), 7.15 – 7.10 (m, 4H), 7.00 – 6.96 (m, 1H), 6.96 – 6.92 (m, 2H), 6.52 (t, *J* = 2.2 Hz, 1H), 5.33 (s, 1H), 3.88 (d, *J* = 6.8 Hz, 2H), 1.21 – 1.09 (m, 1H), 0.48 (q, *J* = 5.9 Hz, 2H), 0.14 (q, *J* = 5.9 Hz, 2H). <sup>13</sup>CNMR (125 MHz, CDCl<sub>3</sub>) δ 151.19, 142.19, 134.89, 133.50, 132.63, 129.62, 127.92, 124.24, 123.29, 123.20, 123.16, 120.80, 120.19, 116.34, 114.11, 110.22, 107.14, 47.81, 33.68, 11.39, 4.22. HRMS (ESI): Calcd. for C<sub>28</sub>H<sub>22</sub>N<sub>3</sub>O [M+H]<sup>+</sup>: 418.1914 ; found: 418.1911.

**(6) 1-allyl-2-(1*H*-pyrazol-1-yl)-3-(9*H*-xanthen-9-yl)-1*H*-indole (4caa)**

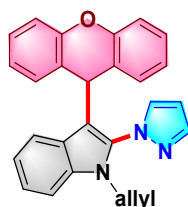

Yellow solid, (40.0 mg, 40% yield); m.p.: 169-171 °C; <sup>1</sup>HNMR (500 MHz, Chloroform-*d*) δ 7.84 (d, *J* = 1.9 Hz, 1H), 7.67 (d, *J* = 2.4 Hz, 1H), 7.31 (d, *J* = 8.1 Hz, 1H), 7.24 – 7.19 (m, 2H), 7.19 – 7.14 (m, 2H), 7.12 – 7.05 (m, 4H), 6.98 – 6.93 (m, 1H), 6.93 – 6.89 (m, 2H), 6.48 (t, *J* = 2.2 Hz, 1H), 5.90 (ddt, *J* = 17.2, 10.3, 5.1 Hz, 1H), 5.33 (s, 1H), 5.12 (d, *J* = 10.3 Hz, 1H), 4.92 (d, *J* = 17.1 Hz, 1H), 4.52 (dt, *J* = 5.0,

1.6 Hz, 2H).  $^{13}\text{C}$ NMR (125 MHz,  $\text{CDCl}_3$ )  $\delta$  151.21, 142.30, 134.84, 133.45, 133.36, 132.66, 129.62, 127.98, 124.33, 123.38, 123.32, 123.11, 120.92, 120.45, 116.92, 116.39, 114.41, 110.29, 107.16, 45.58, 33.66. HRMS (ESI): Calcd. for  $\text{C}_{27}\text{H}_{21}\text{N}_3\text{O}$   $[\text{M}+\text{H}]^+$ : 404.1757; found: 404.1752.

**(7) 1-benzyl-2-(1H-pyrazol-1-yl)-3-(9H-xanthen-9-yl)-1H-indole (4daa)**

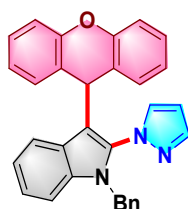

Yellow solid, (42.0 mg, 37% yield); m.p.: 214-215 °C;  $^1\text{H}$ NMR (500 MHz, Chloroform-*d*)  $\delta$  7.86 (t,  $J$  = 1.6 Hz, 1H), 7.53 (t,  $J$  = 2.0 Hz, 1H), 7.32 – 7.26 (m, 5H), 7.21 (q,  $J$  = 8.3 Hz, 3H), 7.17 – 7.12 (m, 4H), 7.08 – 7.04 (m, 2H), 6.98 (q,  $J$  = 7.6 Hz, 3H), 6.44 (t,  $J$  = 2.2 Hz, 1H), 5.38 (s, 1H), 5.19 (s, 2H).  $^{13}\text{C}$ NMR (125 MHz,  $\text{CDCl}_3$ )  $\delta$  151.24, 142.36, 137.41, 135.15, 133.40, 132.96, 129.61, 128.84, 128.02, 127.61, 126.61, 124.40, 123.54, 123.36, 123.08, 120.95, 120.55, 116.42, 114.59, 110.49, 107.24, 46.81, 33.70. HRMS (ESI): Calcd. for  $\text{C}_{31}\text{H}_{23}\text{N}_3\text{O}$   $[\text{M}+\text{H}]^+$ : 454.1914; found: 454.1908.

**(8) 1-phenyl-2-(1H-pyrazol-1-yl)-3-(9H-xanthen-9-yl)-1H-indole (4eaa)**

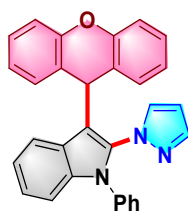

Yellow solid, (74.0 mg, 67% yield); m.p.: 199-201 °C;  $^1\text{H}$ NMR (500 MHz, Chloroform-*d*)  $\delta$  7.72 (d,  $J$  = 1.8 Hz, 1H), 7.49 (d,  $J$  = 2.4 Hz, 1H), 7.41 – 7.37 (m, 2H), 7.36 – 7.31 (m, 1H), 7.31 – 7.27 (m, 4H), 7.23 (d,  $J$  = 7.6 Hz, 2H), 7.22 – 7.16 (m, 3H), 7.15 – 7.13 (m, 2H), 7.00 – 6.94 (m, 3H), 6.34 (t,  $J$  = 2.2 Hz, 1H), 5.46 (s, 1H).  $^{13}\text{C}$ NMR (125 MHz,  $\text{CDCl}_3$ )  $\delta$  151.24, 141.81, 136.26, 135.72, 133.21, 132.51, 129.97, 129.43, 128.07, 127.77, 126.79, 124.43, 123.85, 123.37, 122.90, 121.16, 120.84, 116.48, 116.44, 110.92, 107.32, 33.70. HRMS (ESI): Calcd. for  $\text{C}_{30}\text{H}_{21}\text{N}_3\text{O}$   $[\text{M}+\text{H}]^+$ : 440.1757; found: 440.1755.

**(9) 1,6-dimethyl-2-(1H-pyrazol-1-yl)-3-(9H-xanthen-9-yl)-1H-indole (4faa)**

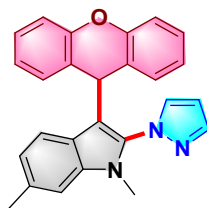

Yellow solid, (67.0 mg, 68% yield); m.p.: 195-197 °C; <sup>1</sup>HNMR (500 MHz, Chloroform-*d*) δ 7.86 (d, *J* = 1.8 Hz, 1H), 7.70 (d, *J* = 2.4 Hz, 1H), 7.21 – 7.16 (m, 2H), 7.15 – 7.08 (m, 6H), 6.93 (td, *J* = 7.4, 1.4 Hz, 2H), 6.82 (d, *J* = 6.7 Hz, 1H), 6.51 (t, *J* = 2.1 Hz, 1H), 5.33 (s, 1H), 3.51 (s, 3H), 2.46 (s, 3H). <sup>13</sup>CNMR (125 MHz, CDCl<sub>3</sub>) δ 151.18, 142.23, 135.71, 133.24, 133.21, 132.49, 129.61, 127.90, 123.27, 123.25, 122.10, 121.95, 120.41, 116.31, 113.78, 109.66, 107.14, 33.66, 29.26, 22.05. HRMS (ESI): Calcd. for C<sub>26</sub>H<sub>21</sub>N<sub>3</sub>O [M+H]<sup>+</sup>: 392.1757; found: 392.1751.

(10) **5-methoxy-1-methyl-2-(1H-pyrazol-1-yl)-3-(9H-xanthen-9-yl)-1H-indole (4gaa)**

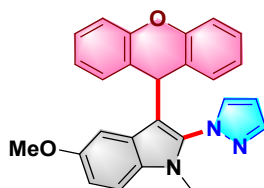

Yellow solid, (62.0 mg, 61% yield); m.p.: 230-232 °C; <sup>1</sup>HNMR (500 MHz, Chloroform-*d*) δ 7.84 (d, *J* = 1.9 Hz, 1H), 7.67 (d, *J* = 2.4 Hz, 1H), 7.19 (d, *J* = 8.9 Hz, 2H), 7.16 (td, *J* = 7.7, 1.0 Hz, 3H), 7.09 (dd, *J* = 8.1, 1.3 Hz, 4H), 6.92 (td, *J* = 7.4, 1.3 Hz, 3H), 6.88 (dd, *J* = 8.9, 2.5 Hz, 2H), 6.69 (d, *J* = 2.5 Hz, 1H), 6.50 (t, *J* = 2.2 Hz, 1H), 5.30 (s, 1H), 3.63 (s, 3H), 3.48 (s, 3H). <sup>13</sup>CNMR (125 MHz, CDCl<sub>3</sub>) δ 154.25, 151.27, 142.25, 133.18, 132.99, 130.52, 129.73, 127.97, 124.58, 123.35, 123.12, 116.29, 114.01, 113.43, 110.57, 107.22, 102.24, 55.69, 33.71, 29.48. HRMS (ESI): Calcd. for C<sub>26</sub>H<sub>21</sub>N<sub>3</sub>O<sub>2</sub> [M+H]<sup>+</sup>: 408.1706; found: 408.1701.

(11) **2-(1H-pyrazol-1-yl)-1-(9H-xanthen-9-yl)-5,6-dihydro-4H-pyrrolo[3,2,1-*ij*]quinoline (4haa)**

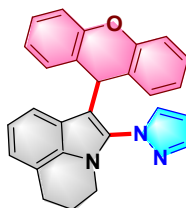

Yellow solid, (49.5 mg, 49% yield); m.p.: 155-157 °C; <sup>1</sup>HNMR (500 MHz, Chloroform-*d*) δ 7.84 (d, *J* = 1.8 Hz, 1H), 7.70 (d, *J* = 2.3 Hz, 1H), 7.22 – 7.14 (m, 2H), 7.14 – 7.07 (m, 4H), 7.03 (d, *J* = 7.1 Hz, 1H), 6.97 – 6.89 (m, 3H), 6.91 – 6.84 (m, 1H), 6.50 (t, *J* = 2.1 Hz, 1H), 5.41 (s, 1H), 3.99 – 3.93 (m, 2H), 2.99 (t, *J* = 6.1 Hz, 2H), 2.24 (m, 2H). <sup>13</sup>CNMR (125 MHz, CDCl<sub>3</sub>) δ 151.25, 142.10, 132.70, 132.39, 131.62, 129.65, 127.87, 123.42, 123.26, 122.36, 121.93, 120.31, 120.12, 118.06, 116.32, 113.05, 107.09, 41.62, 33.75, 24.83, 22.57. HRMS (ESI): Calcd. for C<sub>27</sub>H<sub>21</sub>N<sub>3</sub>O [M+H]<sup>+</sup>: 404.1757; found: 404.1752.

**(12) 1-methyl-2-(1*H*-pyrazol-1-yl)-4-(4,4,5,5-tetramethyl-1,3-dioxolan-2-yl)-3-(9*H*-xanthen-9-yl)-1*H*-indole (4iaa)**

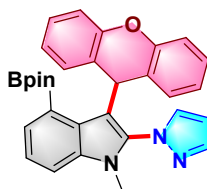

Yellow solid, (76.0 mg, 60% yield); m.p.: 192-194 °C; <sup>1</sup>HNMR (500 MHz, Chloroform-*d*) δ 7.83 (d, *J* = 6.0 Hz, 1H), 7.48 (d, *J* = 7.0 Hz, 1H), 7.43 – 7.36 (m, 2H), 7.17 (d, *J* = 7.4 Hz, 2H), 7.09 (t, *J* = 7.7 Hz, 3H), 6.91 – 6.85 (m, 5H), 6.90 – 6.83 (m, 5H), 6.55 (d, *J* = 2.5 Hz, 1H), 6.09 (t, *J* = 2.1 Hz, 1H), 3.31 (s, 3H), 1.33 (s, 13H). <sup>13</sup>CNMR (125MHz, CDCl<sub>3</sub>) δ 150.22, 141.21, 134.13, 133.80, 132.98, 130.05, 129.68, 129.41, 127.25, 124.29, 122.63, 122.20, 118.38, 115.78, 112.67, 106.08, 84.17, 32.04, 29.02, 24.89. HRMS (ESI): Calcd. for C<sub>31</sub>H<sub>30</sub>BN<sub>3</sub>O<sub>3</sub> [M+H]<sup>+</sup>: 503.2489; found: 504.2449.

**(13) 5-fluoro-1-methyl-2-(1*H*-pyrazol-1-yl)-3-(9*H*-xanthen-9-yl)-1*H*-indole (4jaa)**

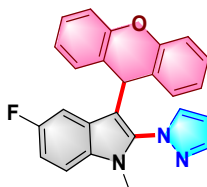

Yellow solid, (57.0 mg, 58% yield), m.p.: 239-241 °C; <sup>1</sup>HNMR (500 MHz, Chloroform-*d*) δ 7.85 (d, *J* = 1.8 Hz, 1H), 7.70 (d, *J* = 2.3 Hz, 1H), 7.22 (dd, *J* = 8.9, 4.2 Hz, 1H), 7.22 – 7.14 (m, 2H), 7.11 (dd, *J* = 8.1, 1.3 Hz, 2H), 7.05 (d, *J* = 7.8 Hz, 2H), 6.97 (td, *J* = 9.0, 2.5 Hz, 2H), 6.92 (td, *J* = 7.4, 1.3 Hz, 2H), 6.86 (dd, *J* = 9.5, 2.5 Hz, 1H), 6.52 (t, *J* = 2.1 Hz, 1H), 5.30 (s, 1H), 3.51 (s, 3H). <sup>13</sup>CNMR (125 MHz, CDCl<sub>3</sub>)

$\delta$  157.88 (d,  $J = 233.7$  Hz), 151.18, 142.46, 134.13, 133.10, 131.93, 129.50, 128.13, 124.38 (d,  $J = 10$  Hz), 123.34, 122.75, 116.54, 114.18 (d,  $J = 5$  Hz), 111.95 (d,  $J = 26.2$  Hz), 110.66 (d,  $J = 10$  Hz), 107.43, 105.68 (d,  $J = 23.7$  Hz), 33.61, 29.62.  $^{19}\text{F}$ NMR (470 MHz,  $\text{CDCl}_3$ )  $\delta$  -122.65. HRMS (ESI): Calcd. for  $\text{C}_{25}\text{H}_{18}\text{FN}_3\text{O}$   $[\text{M}+\text{H}]^+$ : 396.1507; found: 396.1504.

**(14) 5-chloro-1-methyl-2-(1*H*-pyrazol-1-yl)-3-(9*H*-xanthen-9-yl)-1*H*-indole (4kaa)**

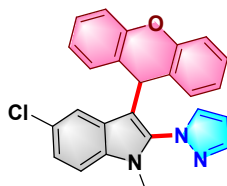

Yellow solid, (70.0 mg, 68% yield), m.p.: 252-254 °C;  $^1\text{H}$ NMR (500 MHz, Chloroform-*d*)  $\delta$  7.83 (d,  $J = 1.9$  Hz, 1H), 7.64 (d,  $J = 2.4$  Hz, 1H), 7.26 – 7.16 (m, 3H), 7.22 – 7.15 (m, 1H), 7.10 (dd,  $J = 8.2, 1.3$  Hz, 2H), 7.03 (dt,  $J = 7.8, 1.4$  Hz, 2H), 6.92 (td,  $J = 7.4, 1.3$  Hz, 2H), 6.49 (t,  $J = 2.2$  Hz, 1H), 5.32 (s, 1H), 3.50 (s, 3H).  $^{13}\text{C}$ NMR (125 MHz,  $\text{CDCl}_3$ )  $\delta$  151.15, 142.49, 134.09, 133.69, 133.09, 129.39, 128.18, 126.01, 125.17, 123.83, 123.35, 122.71, 120.04, 116.57, 113.65, 110.96, 107.43, 33.53, 29.60. HRMS (ESI): Calcd. for  $\text{C}_{25}\text{H}_{18}\text{ClN}_3\text{O}$   $[\text{M}+\text{H}]^+$ : 412.1211; found: 412.1205.

**(15) 6-bromo-1-methyl-2-(1*H*-pyrazol-1-yl)-3-(9*H*-xanthen-9-yl)-1*H*-indole (4laa)**

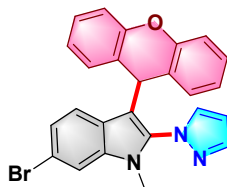

Yellow solid, (70.0 mg, 61% yield), m.p.: 222-224 °C;  $^1\text{H}$ NMR (500 MHz, Chloroform-*d*)  $\delta$  7.87 (d,  $J = 1.9$  Hz, 1H), 7.71 (d,  $J = 2.4$  Hz, 1H), 7.48 (d,  $J = 1.5$  Hz, 1H), 7.20 – 7.16 (m, 2H), 7.12 – 7.08 (m, 2H), 7.07 (s, 1H), 7.06 – 7.03 (m, 3H), 6.92 (td,  $J = 7.4, 1.3$  Hz, 2H), 6.53 (t,  $J = 2.2$  Hz, 1H), 5.32 (s, 1H), 3.49 (s, 3H).  $^{13}\text{C}$ NMR (125 MHz,  $\text{CDCl}_3$ )  $\delta$  151.12, 142.55, 136.11, 133.31, 133.14, 129.49, 128.14, 123.74, 123.36, 122.97, 122.80, 122.08, 117.06, 116.48, 114.32, 112.84, 107.49, 33.57, 29.53. HRMS (ESI): Calcd. for  $\text{C}_{25}\text{H}_{18}\text{BrN}_3\text{O}$   $[\text{M}+\text{H}]^+$ : 456.0706; found: 456.0700.

**(16) methyl 1-methyl-2-(1*H*-pyrazol-1-yl)-3-(9*H*-xanthen-9-yl)-1*H*-indole-7-carboxylate (4maa)**

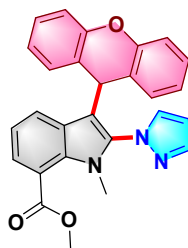

Yellow solid, (30.5 mg, 28% yield), m.p.: 202-204 °C; <sup>1</sup>HNMR (500 MHz, Chloroform-*d*) δ 7.86 (d, *J* = 1.7 Hz, 1H), 7.74 (d, *J* = 2.4 Hz, 1H), 7.65 (d, *J* = 7.6 Hz, 1H), 7.38 (d, *J* = 7.9 Hz, 1H), 7.20 – 7.15 (m, 2H), 7.08 (dd, *J* = 14.9, 7.8 Hz, 4H), 6.95 (t, *J* = 7.6 Hz, 1H), 6.91 (t, *J* = 7.4 Hz, 2H), 6.54 (t, *J* = 2.2 Hz, 1H), 5.35 (s, 1H), 3.96 (s, 3H), 3.49 (s, 3H). <sup>13</sup>CNMR (125 MHz, CDCl<sub>3</sub>) δ 167.97, 151.08, 142.53, 135.11, 133.35, 133.14, 129.64, 128.12, 126.44, 126.35, 125.04, 123.33, 122.78, 119.56, 116.65, 116.43, 114.83, 107.62, 52.39, 33.56, 33.04. HRMS (ESI): Calcd. for C<sub>27</sub>H<sub>21</sub>N<sub>3</sub>O<sub>3</sub> [M+H]<sup>+</sup>: 436.1655; found: 436.1652.

**(17) 1-methyl-2-(1H-pyrazol-1-yl)-3-(9H-xanthen-9-yl)-1H-indole-4-carbonitrile (4naa)**

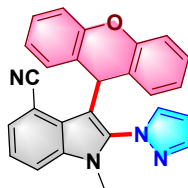

Yellow solid, (40.0 mg, 40% yield), m.p.: 126-128 °C; <sup>1</sup>HNMR (500 MHz, Chloroform-*d*) δ 7.59 (d, *J* = 1.6 Hz, 1H), 7.57 (dd, *J* = 8.0, 1.3 Hz, 1H), 7.44 (ddd, *J* = 8.7, 7.1, 1.7 Hz, 2H), 7.35 (dd, *J* = 8.2, 1.3 Hz, 2H), 7.25 (dd, *J* = 7.5, 1.3 Hz, 1H), 7.23 – 7.19 (m, 3H), 7.07 (td, *J* = 7.5, 1.3 Hz, 2H), 6.93 (d, *J* = 2.2 Hz, 1H), 6.47 (s, 1H), 6.14 (t, *J* = 2.1 Hz, 1H), 3.81 (s, 3H). <sup>13</sup>CNMR (125 MHz, CDCl<sub>3</sub>) δ 152.35, 140.16, 138.28, 132.95, 130.47, 129.99, 129.00, 127.83, 124.48, 123.85, 123.13, 121.57, 117.60, 117.20, 114.47, 104.87, 103.79, 64.44, 33.37. HRMS (ESI): Calcd. for C<sub>26</sub>H<sub>18</sub>N<sub>4</sub>O [M+H]<sup>+</sup>: 403.1553; found: 403.1547.

**(18) 2-(1H-pyrazol-1-yl)-3-(9H-xanthen-9-yl)-1H-indole (4oaa)**

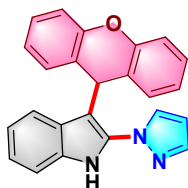

Brownish solid, (36.0 mg, 40% yield), m.p.: 142-144 °C; <sup>1</sup>HNMR (500 MHz, Chloroform-*d*) δ 9.84 (s, 1H), 7.77 (d, *J* = 1.9 Hz, 1H), 7.73 (d, *J* = 2.5 Hz, 1H), 7.34 (d, *J* = 8.0 Hz, 1H), 7.23 – 7.17 (m, 4H), 7.15 (dd, *J* = 8.2, 1.5 Hz, 2H), 7.01 (dt, *J* = 7.8, 1.4 Hz, 2H), 6.96 (t, *J* = 7.1 Hz, 1H), 6.91 – 6.87 (m, 2H), 6.40 (t, *J* = 2.2 Hz, 1H), 5.79 (s, 1H). <sup>13</sup>CNMR (125 MHz, CDCl<sub>3</sub>) δ 151.47, 151.00, 141.57, 133.82, 132.74, 130.66, 129.05, 128.13, 126.39, 123.39, 123.19, 123.05, 120.44, 120.43, 116.44, 111.36, 107.55, 107.14, 33.38. HRMS (ESI): Calcd. for C<sub>24</sub>H<sub>17</sub>N<sub>3</sub>O [M+H]<sup>+</sup>: 364.1444; found: 364.1440.

**(19) 5-methyl-2-(1*H*-pyrazol-1-yl)-3-(9*H*-xanthen-9-yl)-1*H*-indole (4paa)**

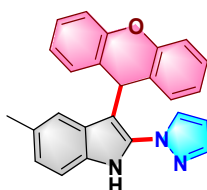

Brownish solid, (43.5 mg, 46% yield), m.p.: 194-196 °C; <sup>1</sup>HNMR (500 MHz, Chloroform-*d*) δ 9.64 (s, 1H), 7.73 (d, *J* = 1.9 Hz, 1H), 7.65 (d, *J* = 2.5 Hz, 1H), 7.25 – 7.19 (m, 3H), 7.16 (m, 2H), 7.01 (ddd, *J* = 7.8, 6.3, 1.6 Hz, 4H), 6.90 (td, *J* = 7.4, 1.4 Hz, 2H), 6.35 (t, *J* = 2.2 Hz, 1H), 5.76 (s, 1H), 2.28 (s, 3H). <sup>13</sup>CNMR (125 MHz, CDCl<sub>3</sub>) δ 151.51, 141.45, 132.86, 132.03, 132.01, 130.63, 130.60, 129.71, 128.96, 128.09, 126.79, 124.75, 123.40, 123.29, 119.90, 116.41, 111.05, 111.03, 107.41, 106.29, 33.34, 21.67. HRMS (ESI): Calcd. for C<sub>25</sub>H<sub>19</sub>N<sub>3</sub>O [M+H]<sup>+</sup>: 378.1601; found: 378.1597.

**(20) 6-fluoro-2-(1*H*-pyrazol-1-yl)-3-(9*H*-xanthen-9-yl)-1*H*-indole (4qaa)**

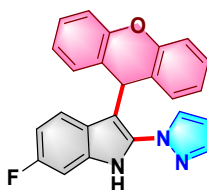

Brownish solid, (61.0 mg, 64% yield), m.p.: 171-173 °C; <sup>1</sup>HNMR (500 MHz, Chloroform-*d*) δ 10.17 – 9.98 (m, 1H), 7.77 (d, *J* = 1.9 Hz, 1H), 7.74 (d, *J* = 2.6 Hz, 1H), 7.22 (t, *J* = 6.8 Hz, 2H), 7.15 (d, *J* = 7.0 Hz, 2H), 7.06 (dd, *J* = 8.8, 5.2 Hz, 1H), 7.00 (dd, *J* = 9.3, 2.3 Hz, 1H), 6.97 (d, *J* = 7.7 Hz, 2H), 6.92 (td, *J* = 7.4, 1.3 Hz, 2H), 6.70 (td, *J* = 9.2, 2.4 Hz, 1H), 6.42 (t, *J* = 2.2 Hz, 1H), 5.72 (s, 1H). <sup>13</sup>CNMR (125 MHz, CDCl<sub>3</sub>) δ 160.41 (d, *J* = 238.8 Hz), 151.44, 141.70, 133.92 (d, *J* = 12.5 Hz), 132.82 (d, *J* = 2.5 Hz), 130.75, 128.94, 128.31, 123.48, 122.90, 122.66, 121.47 (d, *J* = 10 Hz), 116.57, 109.33 (d, *J* = 23.7 Hz), 107.65, 107.50, 97.82 (d, *J* = 26.2 Hz), 33.39. <sup>19</sup>FNMR

(470 MHz, CDCl<sub>3</sub>)  $\delta$  -118.98. HRMS (ESI): Calcd. for C<sub>24</sub>H<sub>16</sub>N<sub>4</sub>O [M+H]<sup>+</sup>: 382.1350; found: 382.1348.

**(21) 1-methyl-2-(1*H*-pyrazol-1-yl)-3-(9*H*-xanthen-9-yl)-1*H*-pyrrolo[2,3-*b*]pyridine (4raa)**

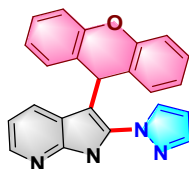

Yellow solid, (52.0 mg, 55% yield), m.p.: 173-175 °C; <sup>1</sup>HNMR (500 MHz, Chloroform-*d*)  $\delta$  8.32 (dd, *J* = 4.7, 1.6 Hz, 1H), 7.90 (d, *J* = 1.9 Hz, 1H), 7.78 (d, *J* = 2.5 Hz, 1H), 7.47 (dd, *J* = 7.9, 1.6 Hz, 1H), 7.20 – 7.16 (m, 2H), 7.11 (dd, *J* = 8.2, 1.3 Hz, 2H), 7.06 (d, *J* = 7.6 Hz, 2H), 6.93 (td, *J* = 7.4, 1.3 Hz, 2H), 6.89 (dd, *J* = 7.9, 4.7 Hz, 1H), 6.57 (t, *J* = 2.2 Hz, 1H), 5.34 (s, 1H), 3.65 (s, 3H). <sup>13</sup>CNMR (125 MHz, CDCl<sub>3</sub>)  $\delta$  151.14, 146.22, 144.56, 142.63, 133.01, 132.99, 129.63, 129.01, 128.22, 123.43, 122.79, 117.30, 116.72, 116.54, 112.95, 107.67, 33.60, 28.13. HRMS (ESI): Calcd. for C<sub>24</sub>H<sub>18</sub>N<sub>4</sub>O [M+H]<sup>+</sup>: 379.1553; found: 379.1551.

**(22) 1-methyl-3-(2-methyl-9*H*-xanthen-9-yl)-2-(1*H*-pyrazol-1-yl)-1*H*-indole (4aba)**

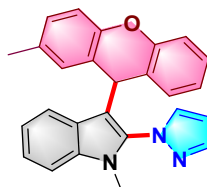

Yellow solid, (73.0 mg, 75% yield), m.p.: 195-197 °C; <sup>1</sup>HNMR (500 MHz, Chloroform-*d*)  $\delta$  7.88 (d, *J* = 1.8 Hz, 1H), 7.72 (d, *J* = 2.3 Hz, 1H), 7.33 (d, *J* = 8.3 Hz, 1H), 7.30 (d, *J* = 8.0 Hz, 1H), 7.28 – 7.25 (m, 1H), 7.19 – 7.14 (m, 1H), 7.12 – 7.08 (m, 2H), 7.03 (d, *J* = 8.3 Hz, 1H), 7.01 – 6.97 (m, 2H), 6.93 – 6.89 (m, 2H), 6.53 (t, *J* = 2.2 Hz, 1H), 5.34 (s, 1H), 3.54 (s, 3H), 2.19 (s, 3H). <sup>13</sup>CNMR (125 MHz, CDCl<sub>3</sub>)  $\delta$  151.27, 149.08, 142.27, 135.27, 133.19, 132.81, 132.49, 129.78, 129.67, 128.70, 127.85, 124.26, 123.21, 123.15, 123.05, 122.65, 120.76, 120.28, 116.29, 116.08, 114.24, 109.67, 107.21, 33.68, 29.35, 20.86. HRMS (ESI): Calcd. for C<sub>26</sub>H<sub>21</sub>N<sub>3</sub>O [M+H]<sup>+</sup>: 392.1757; found: 392.1751.

**(23) 3-(2-methoxy-9*H*-xanthen-9-yl)-1-methyl-2-(1*H*-pyrazol-1-yl)-1*H*-indole**



**(4aca)**

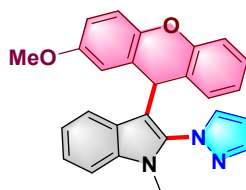

Yellow solid, (51.0 mg, 50% yield), m.p.: 155-157 °C; <sup>1</sup>HNMR (500 MHz, Chloroform-*d*) δ 7.87 (d, *J* = 1.8 Hz, 1H), 7.72 (d, *J* = 2.4 Hz, 1H), 7.32 (d, *J* = 8.3 Hz, 1H), 7.28 – 7.23 (m, 2H), 7.20 – 7.15 (m, 1H), 7.09 (dd, *J* = 7.9, 5.3 Hz, 2H), 7.06 (d, *J* = 8.9 Hz, 1H), 6.98 (t, *J* = 7.6 Hz, 1H), 6.91 (t, *J* = 7.5 Hz, 1H), 6.74 (dd, *J* = 8.9, 3.0 Hz, 1H), 6.67 (d, *J* = 2.4 Hz, 1H), 6.53 (t, *J* = 2.2 Hz, 1H), 5.33 (s, 1H), 3.53 (s, 3H). <sup>13</sup>CNMR (125 MHz, CDCl<sub>3</sub>) δ 155.35, 151.40, 145.30, 142.28, 135.28, 133.16, 132.82, 129.65, 127.91, 124.18, 123.92, 123.25, 123.00, 122.55, 120.71, 120.32, 117.01, 116.27, 114.25, 114.01, 113.67, 109.69, 107.26, 55.65, 34.08, 29.34. HRMS (ESI): Calcd. for C<sub>26</sub>H<sub>21</sub>N<sub>3</sub>O [M+H]<sup>+</sup>: 408.1706; found: 408.1704.

**(24) 3-(2-fluoro-9H-xanthen-9-yl)-1-methyl-2-(1H-pyrazol-1-yl)-1H-indole**

**(4ada)**

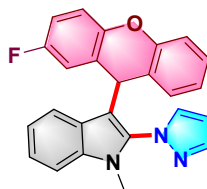

Yellow solid, (66.0 mg, 67% yield), m.p.: 219-221 °C; <sup>1</sup>HNMR (500 MHz, Chloroform-*d*) δ 7.87 (d, *J* = 1.9 Hz, 1H), 7.70 (d, *J* = 2.4 Hz, 1H), 7.34 (d, *J* = 8.3 Hz, 1H), 7.26 (d, *J* = 7.0 Hz, 1H), 7.23 (d, *J* = 8.0 Hz, 1H), 7.21 – 7.16 (m, 1H), 7.12 – 7.05 (m, 3H), 7.00 (t, *J* = 8.1 Hz, 1H), 6.93 (t, *J* = 7.4 Hz, 1H), 6.88 (td, *J* = 8.4, 3.1 Hz, 1H), 6.84 – 6.80 (m, 1H), 6.54 (t, *J* = 2.2 Hz, 1H), 5.33 (s, 1H), 3.54 (s, 3H). <sup>13</sup>CNMR (125 MHz, CDCl<sub>3</sub>) δ 158.57 (d, *J* = 240.0 Hz), 151.07, 147.29 (d, *J* = 2.5 Hz), 142.38, 135.32, 133.10, 133.07, 129.58, 128.12, 124.70 (d, *J* = 7.5 Hz), 124.00, 123.42, 123.41, 122.16, 120.55, 120.46, 117.50 (d, *J* = 7.5 Hz), 116.32, 115.58 (d, *J* = 23.7 Hz), 114.95 (d, *J* = 25 Hz), 113.42, 109.84, 107.39, 33.94, 29.37. <sup>19</sup>FNMR (470 MHz, CDCl<sub>3</sub>) δ -120.14. HRMS (ESI): Calcd. for C<sub>25</sub>H<sub>18</sub>FN<sub>3</sub>O [M+H]<sup>+</sup>: 396.1506; found: 396.1505.

**(25) 3-(3-chloro-9H-xanthen-9-yl)-1-methyl-2-(1H-pyrazol-1-yl)-1H-indole (4aea)**

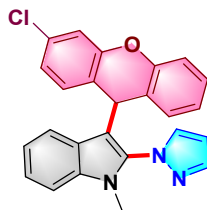

Yellow solid, (39.0 mg, 38% yield), m.p.: 201-203 °C; <sup>1</sup>HNMR (500 MHz, Chloroform-*d*) δ 7.85 (d, *J* = 1.8 Hz, 1H), 7.66 (d, *J* = 2.4 Hz, 1H), 7.33 (d, *J* = 8.2 Hz, 1H), 7.26 (d, *J* = 7.1 Hz, 1H), 7.24 – 7.20 (m, 1H), 7.18 (t, *J* = 6.8 Hz, 1H), 7.11 (d, *J* = 2.1 Hz, 1H), 7.10 – 7.06 (m, 2H), 7.00 (dd, *J* = 17.2, 8.1 Hz, 2H), 6.93 (t, *J* = 7.5 Hz, 1H), 6.88 (dd, *J* = 8.3, 2.1 Hz, 1H), 6.52 (t, *J* = 2.2 Hz, 1H), 5.30 (s, 1H), 3.52 (s, 3H). <sup>13</sup>CNMR (125 MHz, CDCl<sub>3</sub>) δ 151.58, 150.74, 142.38, 135.29, 133.12, 133.03, 133.02, 130.72, 129.61, 128.14, 124.03, 123.68, 123.51, 123.43, 122.78, 121.82, 120.52, 120.48, 116.59, 116.42, 113.68, 109.83, 107.37, 33.29, 29.37. HRMS (ESI): Calcd. for C<sub>25</sub>H<sub>18</sub>ClN<sub>3</sub>O [M+H]<sup>+</sup>: 412.1211; found: 412.1206.

**(26) 3-(2-chloro-9H-xanthen-9-yl)-1-methyl-2-(1H-pyrazol-1-yl)-1H-indole (4afa)**

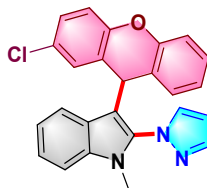

Yellow solid, (51.0 mg, 50% yield), m.p.: 208-210 °C; <sup>1</sup>HNMR (500 MHz, Chloroform-*d*) δ 7.87 (d, *J* = 1.9 Hz, 1H), 7.69 (d, *J* = 2.5 Hz, 1H), 7.34 (d, *J* = 8.2 Hz, 1H), 7.26 (d, *J* = 1.3 Hz, 1H), 7.24 – 7.21 (m, 1H), 7.17 (td, *J* = 7.9, 7.5, 1.6 Hz, 1H), 7.11 (s, 1H), 7.10 – 7.06 (m, 3H), 7.04 (d, *J* = 8.7 Hz, 1H), 6.99 (s, 1H), 6.92 (d, *J* = 1.3 Hz, 1H), 6.53 (t, *J* = 2.1 Hz, 1H), 5.31 (s, 1H), 3.53 (s, 3H). <sup>13</sup>CNMR (125 MHz, CDCl<sub>3</sub>) δ 150.78, 149.80, 142.39, 135.29, 133.11, 129.70, 129.28, 128.15, 128.13, 127.94, 124.86, 124.02, 123.59, 123.41, 122.42, 120.49, 120.45, 117.81, 116.35, 113.59, 109.87, 107.41, 33.65, 29.39. HRMS (ESI): Calcd. for C<sub>25</sub>H<sub>18</sub>ClN<sub>3</sub>O [M+H]<sup>+</sup>: 412.1211; found: 412.1207.

**(27) 3-(2-bromo-9H-xanthen-9-yl)-1-methyl-2-(1H-pyrazol-1-yl)-1H-indole (4aga)**

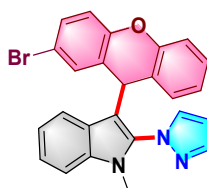

Yellow solid, (65.0 mg, 57% yield), m.p.: 200-202 °C; <sup>1</sup>HNMR (500 MHz, Chloroform-*d*) δ 7.87 (d, *J* = 1.9 Hz, 1H), 7.68 (d, *J* = 2.5 Hz, 1H), 7.33 (d, *J* = 8.3 Hz, 1H), 7.28 (s, 1H), 7.25 (d, *J* = 5.5 Hz, 1H), 7.23 (d, *J* = 8.1 Hz, 1H), 7.21 (d, *J* = 1.4 Hz, 1H), 7.19 – 7.15 (m, 1H), 7.08 (dt, *J* = 7.8, 1.6 Hz, 2H), 6.99 (t, *J* = 8.6 Hz, 2H), 6.92 (t, *J* = 7.4 Hz, 1H), 6.53 (t, *J* = 2.2 Hz, 1H), 5.32 (s, 1H), 3.53 (s, 3H). <sup>13</sup>CNMR (125 MHz, CDCl<sub>3</sub>) δ 150.72, 150.33, 142.39, 135.28, 133.11, 132.23, 131.03, 129.73, 128.16, 125.37, 124.03, 123.62, 123.42, 122.48, 120.51, 120.43, 118.25, 116.36, 115.42, 113.64, 109.88, 107.42, 33.58, 29.40. HRMS (ESI): Calcd. for C<sub>25</sub>H<sub>18</sub>BrN<sub>3</sub>O [M+H]<sup>+</sup>: 456.0706; found: 456.0700.

**(28) 1-methyl-2-(1*H*-pyrazol-1-yl)-3-(2-(trifluoromethyl)-9*H*-xanthen-9-yl)-1*H*-indole (4aha)**

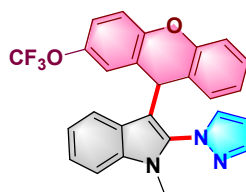

Yellow solid, (50.0 mg, 43% yield), m.p.: 221-223 °C; <sup>1</sup>HNMR (500 MHz, Chloroform-*d*) δ 7.85 (d, *J* = 1.9 Hz, 1H), 7.65 (d, *J* = 2.4 Hz, 1H), 7.34 (d, *J* = 8.2 Hz, 1H), 7.26 (d, *J* = 15.3 Hz, 1H), 7.19 (dd, *J* = 15.2, 7.4 Hz, 2H), 7.13 – 7.00 (m, 4H), 6.99 (t, *J* = 7.9 Hz, 2H), 6.94 (dd, *J* = 13.5, 7.5 Hz, 2H), 6.52 (t, *J* = 2.2 Hz, 1H), 5.33 (s, 1H), 3.53 (s, 3H). <sup>13</sup>CNMR (125 MHz, CDCl<sub>3</sub>) δ 150.88, 149.71, 144.52 (q, *J* = 3.7, 1.2 Hz), 142.41, 135.32, 133.16, 133.03, 129.60, 128.22, 124.76, 124.00, 123.73, 123.45, 122.30, 121.57, 120.85, 120.51, 120.48, 119.53, 117.50, 116.38, 113.20, 109.90, 107.45, 33.85, 29.42. <sup>19</sup>FNMR (470 MHz, CDCl<sub>3</sub>) δ -58.13. HRMS (ESI): Calcd. for C<sub>26</sub>H<sub>18</sub>F<sub>3</sub>N<sub>3</sub>O [M+H]<sup>+</sup>: 462.1423; found: 462.1416.

**(29) 3-(2-methoxy-10-methyl-12*H*-benzo[*a*]xanthen-12-yl)-1-methyl-2-(1*H*-pyrazol-1-yl)-1*H*-indole (4aia)**

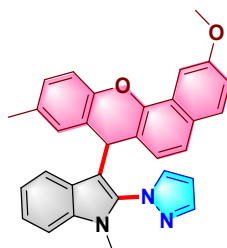

Yellow solid, (12.0 mg, 10% yield), m.p.: 226-228 °C; <sup>1</sup>HNMR (500 MHz, Chloroform-*d*) δ 7.86 (d, *J* = 1.9 Hz, 1H), 7.75 (dd, *J* = 4.2, 2.5 Hz, 2H), 7.63 (d, *J* = 8.9 Hz, 1H), 7.31 – 7.27 (m, 3H), 7.20 (t, *J* = 8.0 Hz, 2H), 7.14 (dd, *J* = 8.9, 2.6 Hz, 1H), 7.01 (d, *J* = 8.6 Hz, 2H), 6.94 (s, 1H), 6.92 (t, *J* = 8.1 Hz, 1H), 6.52 (t, *J* = 2.2 Hz, 1H), 5.43 (s, 1H), 4.05 (s, 3H), 3.52 (s, 3H), 2.21 (s, 3H). <sup>13</sup>CNMR (125 MHz, CDCl<sub>3</sub>) δ 157.99, 148.94, 145.08, 142.29, 135.26, 133.30, 132.79, 132.55, 130.06, 129.23, 128.90, 128.68, 125.10, 124.63, 124.43, 123.21, 122.60, 122.28, 120.67, 120.30, 118.70, 117.30, 116.23, 114.92, 109.65, 107.25, 100.41, 55.59, 34.07, 29.35, 20.93. HRMS (ESI): Calcd. for C<sub>31</sub>H<sub>25</sub>N<sub>3</sub>O<sub>2</sub> [M+H]<sup>+</sup>: 472.2019; found: 472.2015.

**(30) 1-methyl-2-(4-methyl-1H-pyrazol-1-yl)-3-(9H-xanthen-9-yl)-1H-indole (4aab)**

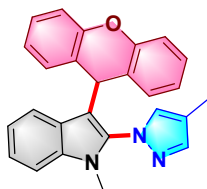

Yellow solid, (68.5 mg, 70% yield), m.p.: 194-196 °C; <sup>1</sup>HNMR (500 MHz, Chloroform-*d*) δ 7.66 (s, 1H), 7.44 (s, 1H), 7.32 (d, *J* = 8.2 Hz, 1H), 7.25 – 7.20 (m, 2H), 7.19 – 7.15 (m, 2H), 7.12 – 7.07 (m, 4H), 6.96 (t, *J* = 7.6 Hz, 1H), 6.92 (td, *J* = 7.4, 1.3 Hz, 2H), 5.37 (s, 1H), 3.54 (s, 3H), 2.19 (s, 3H). <sup>13</sup>CNMR (125 MHz, CDCl<sub>3</sub>) δ 151.20, 143.15, 135.27, 133.44, 131.50, 129.67, 127.90, 124.18, 123.26, 123.12, 120.73, 120.22, 117.68, 116.29, 113.64, 109.68, 33.64, 29.37, 8.96. HRMS (ESI): Calcd. for C<sub>26</sub>H<sub>21</sub>N<sub>3</sub>O [M+H]<sup>+</sup>: 392.1757; found: 392.1750.

**(31) 2-(3-cyclopropyl-1H-pyrazol-1-yl)-1-methyl-3-(9H-xanthen-9-yl)-1H-indole (4aac)**

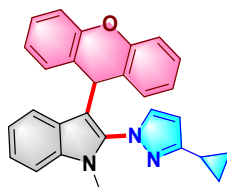

Yellow solid, (53.0 mg, 51% yield), m.p.: 121-123 °C; <sup>1</sup>HNMR (500 MHz, Chloroform-*d*) δ 7.49 (d, *J* = 2.4 Hz, 1H), 7.30 (d, *J* = 8.3 Hz, 1H), 7.23 (dd, *J* = 13.9, 8.1 Hz, 2H), 7.18 – 7.15 (m, 2H), 7.10 – 7.06 (m, 4H), 6.96 (t, *J* = 7.6 Hz, 1H), 6.92 – 6.89 (m, 2H), 6.13 (d, *J* = 2.4 Hz, 1H), 5.38 (s, 1H), 3.54 (s, 3H), 2.02 (ddd, *J* = 13.4, 8.5, 5.0 Hz, 1H), 1.01 – 0.97 (m, 2H), 0.85 – 0.81 (m, 2H). <sup>13</sup>CNMR (125 MHz, CDCl<sub>3</sub>)

$\delta$  158.03, 151.17, 135.23, 133.63, 133.29, 129.68, 127.88, 124.33, 123.31, 123.21, 123.11, 120.58, 120.21, 116.31, 113.78, 109.67, 103.91, 33.61, 29.42, 9.38, 8.47. HRMS (ESI): Calcd. for  $C_{28}H_{23}N_3O$   $[M+H]^+$ : 418.1914; found: 418.1908.

**(32) 1-methyl-2-(3-phenyl-1H-pyrazol-1-yl)-3-(9H-xanthen-9-yl)-1H-indole (4aad)**

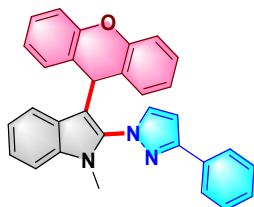

Yellow solid, (57.0 mg, 50% yield), m.p.: 253-254 °C;  $^1H$ NMR (500 MHz, Chloroform-*d*)  $\delta$  7.89 (d,  $J$  = 6.9 Hz, 2H), 7.66 (d,  $J$  = 2.4 Hz, 1H), 7.45 (t,  $J$  = 7.6 Hz, 2H), 7.38 (t,  $J$  = 7.4 Hz, 1H), 7.32 (dd,  $J$  = 12.4, 8.1 Hz, 2H), 7.27 – 7.24 (m, 1H), 7.16 (t,  $J$  = 7.8 Hz, 4H), 7.08 (d,  $J$  = 6.9 Hz, 2H), 7.00 (t,  $J$  = 7.0 Hz, 1H), 6.95 – 6.89 (m, 2H), 6.79 (d,  $J$  = 2.4 Hz, 1H), 5.49 (s, 1H), 3.60 (s, 3H).  $^{13}C$ NMR (125 MHz,  $CDCl_3$ )  $\delta$  154.14, 151.16, 135.31, 134.44, 133.04, 132.89, 129.71, 128.83, 128.44, 127.95, 126.17, 124.38, 123.30, 123.25, 123.21, 120.64, 120.38, 116.38, 114.27, 109.77, 104.64, 33.68, 29.52. HRMS (ESI): Calcd. for  $C_{31}H_{23}N_3O$   $[M+H]^+$ : 454.1914; found: 454.1908.

**(33) 2-(4-chloro-1H-pyrazol-1-yl)-1-methyl-3-(9H-xanthen-9-yl)-1H-indole (4aae)**

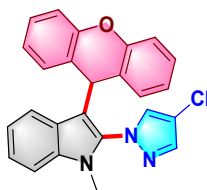

Yellow solid, (36.0 mg, 35% yield), m.p.: 164-166 °C;  $^1H$ NMR (500 MHz, Chloroform-*d*)  $\delta$  7.72 (s, 1H), 7.54 (s, 1H), 7.32 (d,  $J$  = 8.3 Hz, 2H), 7.28 (m, 1H), 7.20 – 7.15 (m, 2H), 7.09 (dd,  $J$  = 8.2, 1.4 Hz, 2H), 7.05 (d,  $J$  = 7.7 Hz, 2H), 7.03 – 7.00 (m, 1H), 6.93 – 6.89 (m, 2H), 5.40 (s, 1H), 3.52 (s, 3H).  $^{13}C$ NMR (125 MHz,  $CDCl_3$ )  $\delta$  151.08, 140.89, 135.19, 132.17, 130.84, 129.55, 128.10, 124.20, 123.66, 123.30, 122.86, 120.72, 120.60, 116.45, 114.94, 112.09, 109.83, 33.55, 29.38. HRMS (ESI): Calcd. for  $C_{25}H_{18}ClN_3O$   $[M+H]^+$ : 412.1211; found: 412.1207.

**(34) 2-(4-iodo-1H-pyrazol-1-yl)-1-methyl-3-(9H-xanthen-9-yl)-1H-indole (4aaf)**

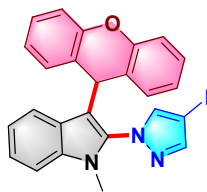

Yellow solid (35.0 mg, 28% yield), m.p.: 198-200 °C; <sup>1</sup>HNMR (500 MHz, Chloroform-*d*) δ 7.79 (s, 1H), 7.55 (s, 1H), 7.34 (dd, *J* = 13.7, 8.1 Hz, 2H), 7.28 (d, *J* = 7.1 Hz, 1H), 7.20 – 7.16 (m, 2H), 7.10 (d, *J* = 6.9 Hz, 2H), 7.06 – 7.02 (m, 3H), 6.93 – 6.89 (m, 2H), 5.42 (s, 1H), 3.50 (s, 3H). <sup>13</sup>CNMR (125 MHz, CDCl<sub>3</sub>) δ 151.00, 147.23, 137.26, 135.16, 131.95, 129.56, 128.08, 124.27, 123.62, 123.28, 122.85, 120.64, 120.58, 116.44, 114.99, 109.82, 58.66, 33.49, 29.39. HRMS (ESI): Calcd. for C<sub>25</sub>H<sub>18</sub>IN<sub>3</sub>O [M+H]<sup>+</sup>: 504.0567; found: 504.0562.

**(35) 2-(4-bromo-3-methyl-1H-pyrazol-1-yl)-1-methyl-3-(9H-xanthen-9-yl)-1H-indole (4aag)**

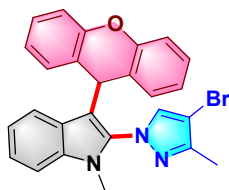

Yellow solid, (53.0 mg, 45% yield), m.p.: 140-142 °C; <sup>1</sup>HNMR (500 MHz, Chloroform-*d*) δ 7.46 (s, 1H), 7.34 (d, *J* = 8.1 Hz, 1H), 7.32 (d, *J* = 8.3 Hz, 1H), 7.26 (d, *J* = 1.2 Hz, 1H), 7.20 – 7.16 (m, 2H), 7.09 (dd, *J* = 8.2, 1.3 Hz, 2H), 7.05 (d, *J* = 7.8 Hz, 2H), 7.02 (t, *J* = 8.1 Hz, 1H), 6.93 – 6.89 (m, 2H), 5.44 (s, 1H), 3.53 (s, 3H), 2.32 (s, 3H). <sup>13</sup>CNMR (125 MHz, CDCl<sub>3</sub>) δ 151.04, 150.48, 135.13, 133.26, 132.46, 129.58, 127.97, 127.95, 124.31, 123.48, 123.24, 123.00, 120.58, 120.48, 116.36, 114.84, 109.78, 96.28, 33.48, 29.38, 12.22. HRMS (ESI): Calcd. for C<sub>26</sub>H<sub>20</sub>BrN<sub>3</sub>O [M+H]<sup>+</sup>: 470.0862; found: 470.0860.

**(36) 1-(1-methyl-3-(9H-xanthen-9-yl)-1H-indol-2-yl)-1H-indazole (4aah)**

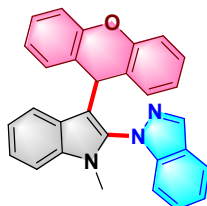

Yellow solid, (13.0 mg, 12% yield), m.p.: 202-204 °C; <sup>1</sup>HNMR (500 MHz, Chloroform-*d*) δ 8.33 (s, 1H), 7.86 (d, *J* = 8.0 Hz, 1H), 7.44 (t, *J* = 8.2 Hz, 1H), 7.37 –

7.33 (m, 2H), 7.32 – 7.26 (m, 4H), 7.17 – 7.13 (m, 1H), 7.13 – 7.09 (m, 1H), 7.06 (d,  $J = 6.9$  Hz, 1H), 7.01 – 6.96 (m, 3H), 6.94 – 6.91 (m, 1H), 6.89 – 6.85 (m, 1H), 5.23 (s, 1H), 3.39 (s, 3H).  $^{13}\text{C}$ NMR (125 MHz,  $\text{CDCl}_3$ )  $\delta$  151.40, 150.97, 142.70, 137.08, 135.70, 130.84, 130.14, 129.60, 128.06, 127.92, 127.80, 124.46, 124.33, 123.39, 123.30, 123.28, 123.11, 122.95, 122.10, 121.52, 120.89, 120.26, 116.67, 116.44, 116.18, 109.76, 109.73, 33.93, 29.30. HRMS (ESI): Calcd. for  $\text{C}_{29}\text{H}_{21}\text{N}_3\text{O}$   $[\text{M}+\text{H}]^+$ : 428.1757; found: 428.1752.

**(37) 1-methyl-2-(1*H*-1,2,4-triazol-1-yl)-3-(9*H*-xanthen-9-yl)-1*H*-indole (4aai)**

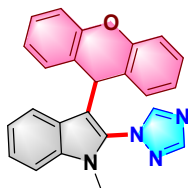

Yellow solid, (37.0 mg, 39% yield), m.p.: 205-208 °C;  $^1\text{H}$ NMR (500 MHz, Chloroform- $d$ )  $\delta$  8.14 (s, 1H), 8.10 (s, 1H), 7.47 (d,  $J = 8.1$  Hz, 1H), 7.35 (d,  $J = 8.3$  Hz, 1H), 7.32 (t,  $J = 7.0$  Hz, 1H), 7.20 – 7.15 (m, 2H), 7.09 (ddd,  $J = 12.1, 8.1, 1.3$  Hz, 3H), 7.06 – 7.03 (m, 2H), 6.92 (td,  $J = 7.4, 1.3$  Hz, 2H), 5.43 (s, 1H), 3.49 (s, 3H).  $^{13}\text{C}$ NMR (125 MHz,  $\text{CDCl}_3$ )  $\delta$  153.41, 150.84, 146.38, 135.35, 129.39, 128.48, 128.25, 124.44, 124.04, 123.32, 122.57, 120.87, 120.52, 116.60, 116.11, 109.92, 33.42, 29.39. HRMS (ESI): Calcd. for  $\text{C}_{24}\text{H}_{18}\text{N}_4\text{O}$   $[\text{M}+\text{H}]^+$ : 379.1553; found: 379.1548.

**(38) 6-(1*H*-pyrazol-1-yl)-7-(9*H*-xanthen-9-yl)-5*H*-pyrrolo[3,2-*d*]pyrimidine (4saa)**

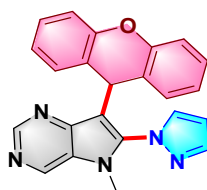

Yellow solid, (26.0 mg, 34% yield), m.p.: 102-105 °C;  $^1\text{H}$ NMR (500 MHz, Chloroform- $d$ )  $\delta$  9.96 (s, 1H), 8.86 (s, 1H), 8.73 (d,  $J = 2.7$  Hz, 1H), 7.81 (d,  $J = 1.6$  Hz, 1H), 7.41 (dd,  $J = 7.7, 1.6$  Hz, 2H), 7.24 – 7.19 (m, 2H), 7.14 (dd,  $J = 8.2, 1.3$  Hz, 2H), 7.02 (d,  $J = 2.8$  Hz, 1H), 7.00 (td,  $J = 7.4, 1.4$  Hz, 2H), 6.52 (dd,  $J = 2.7, 1.7$  Hz, 1H), 5.95 (s, 1H).  $^{13}\text{C}$ NMR (125 MHz,  $\text{CDCl}_3$ )  $\delta$  151.47, 150.36, 149.88, 143.58, 141.71, 130.54, 129.87, 128.02, 127.83, 124.68, 123.46, 123.42, 116.64, 116.02, 108.23, 33.55. HRMS (ESI): Calcd. for  $\text{C}_{22}\text{H}_{15}\text{N}_5\text{O}$   $[\text{M}+\text{H}]^+$ : 366.1349; found: 366.1347.

**(39)1-(1-methyl-2-(1*H*-pyrazol-1-yl)-1*H*-indol-3-yl)-2-(4(trifluoromethyl)phenyl)-1,2,3,4-tetrahydroisoquinoline (4aja)**

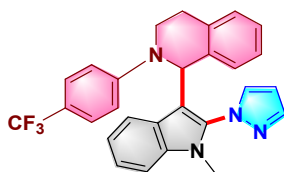

Yellow solid, (16.0 mg, 13% yield), m.p.: 83-85 °C; <sup>1</sup>HNMR (500 MHz, Chloroform-*d*) δ 7.83 (s, 1H), 7.38 (d, *J* = 8.4 Hz, 2H), 7.34 – 7.27 (m, 2H), 7.27 – 7.21 (m, 2H), 7.16 (m, 2H), 7.09 (dt, *J* = 15.4, 8.3 Hz, 3H), 6.79 (d, *J* = 8.5 Hz, 2H), 6.37 (t, *J* = 2.3 Hz, 1H), 6.20 (s, 1H), 3.79 – 3.65 (m, 2H), 3.40 (s, 3H), 3.06 (dt, *J* = 15.5, 7.0 Hz, 1H), 2.87 (dt, *J* = 16.3, 4.5 Hz, 1H). <sup>13</sup>CNMR (125 MHz, CDCl<sub>3</sub>) δ 151.80, 141.98, 136.53, 134.93, 134.67, 133.48, 133.14, 128.66, 127.99, 126.97, 126.47, 126.44, 126.41, 126.39, 125.43, 124.97 (d, *J* = 268.7), 123.10, 120.66, 120.51, 119.60 (q, *J* = 32.7), 115.02, 111.65, 109.83, 107.13, 55.08, 43.30, 29.23, 27.22. <sup>19</sup>FNMR (470 MHz, CDCl<sub>3</sub>) δ -61.07. HRMS (ESI): Calcd. for C<sub>28</sub>H<sub>23</sub>F<sub>3</sub>N<sub>4</sub> [M+H]<sup>+</sup>: 473.1947; found: 473.1944.



## 10. NMR spectra of the obtained compounds.

### (1) $^1\text{H-NMR}$ (500 MHz, $\text{CDCl}_3$ ) spectrum of 2i

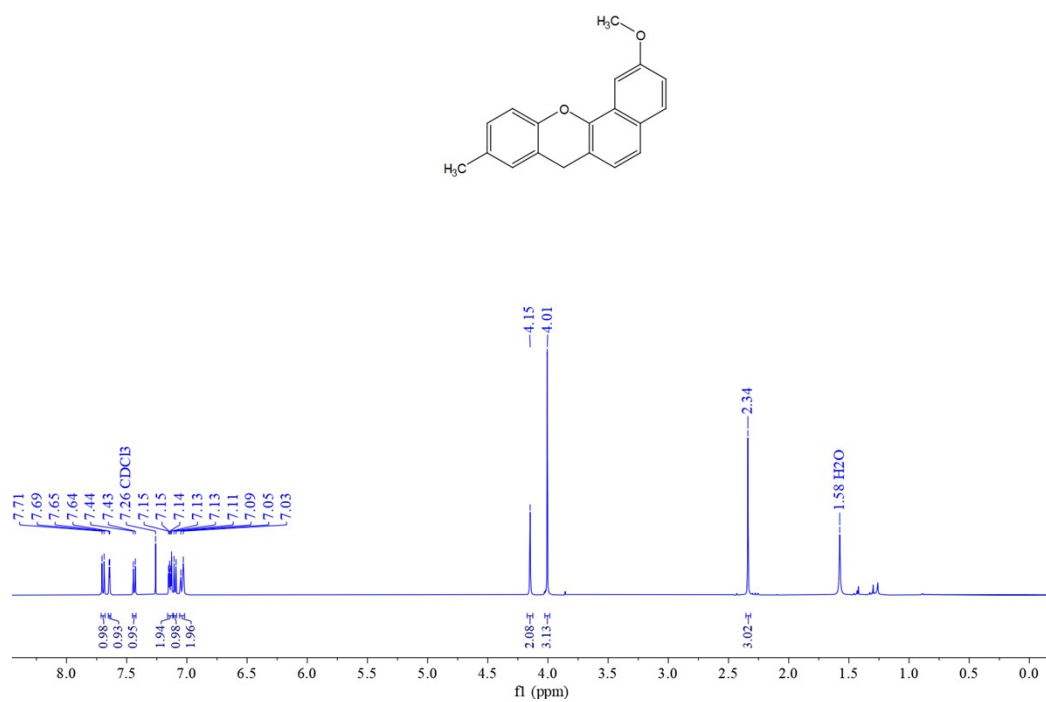

### (2) $^{13}\text{C-NMR}$ (125 MHz, $\text{CDCl}_3$ ) spectrum of 2i

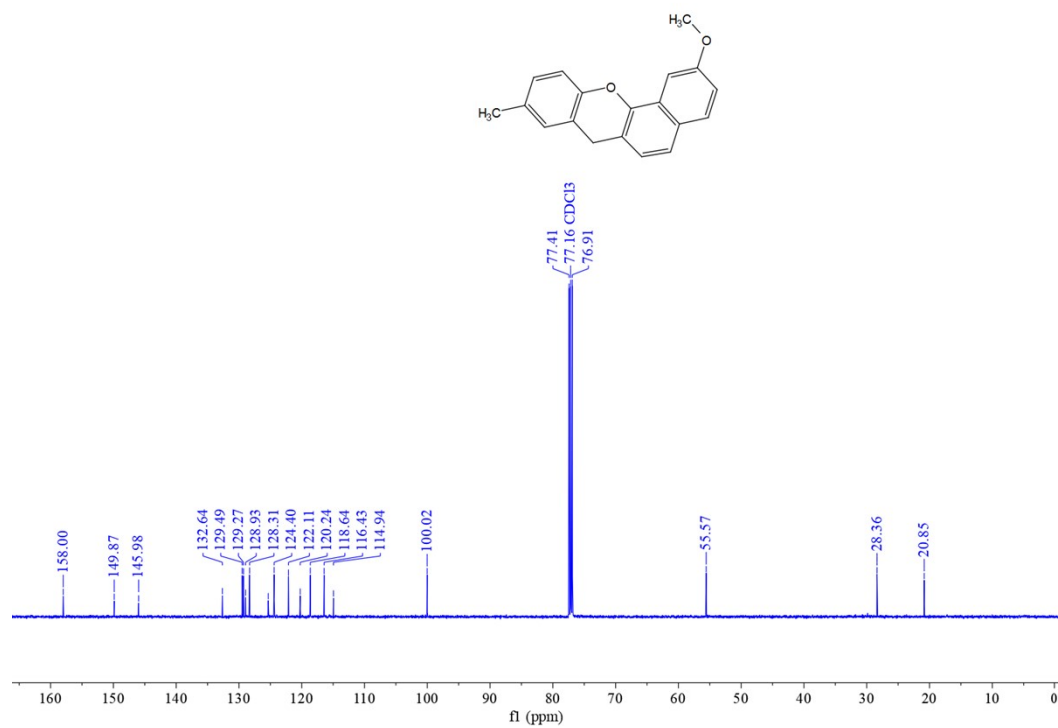

(3)  $^1\text{H-NMR}$  (500 MHz,  $\text{CDCl}_3$ ) spectrum of 2a-1

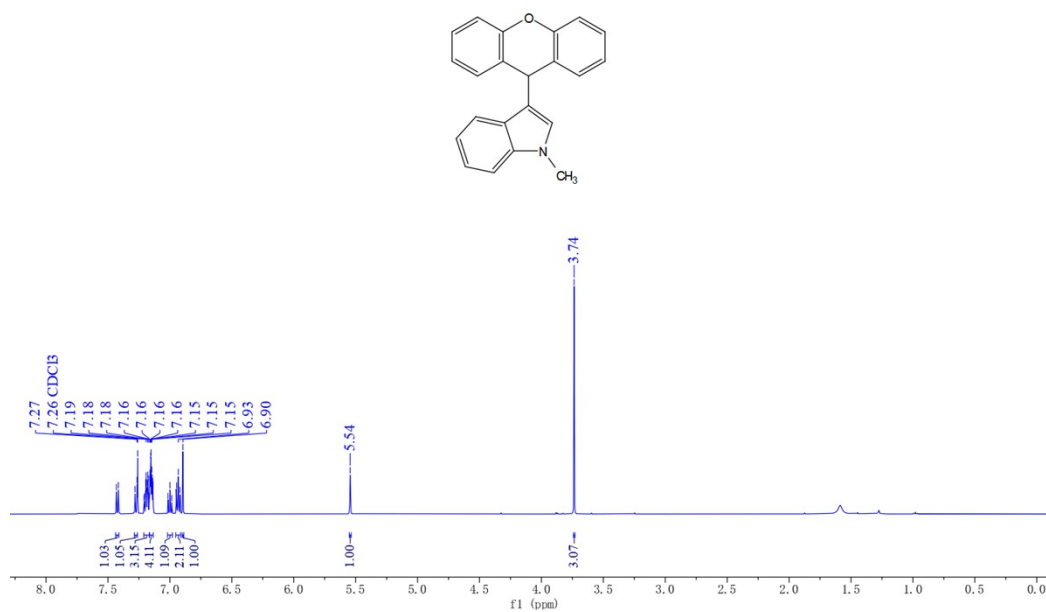

(4)  $^1\text{H-NMR}$  (500 MHz,  $\text{CDCl}_3$ ) spectrum of 2a-2

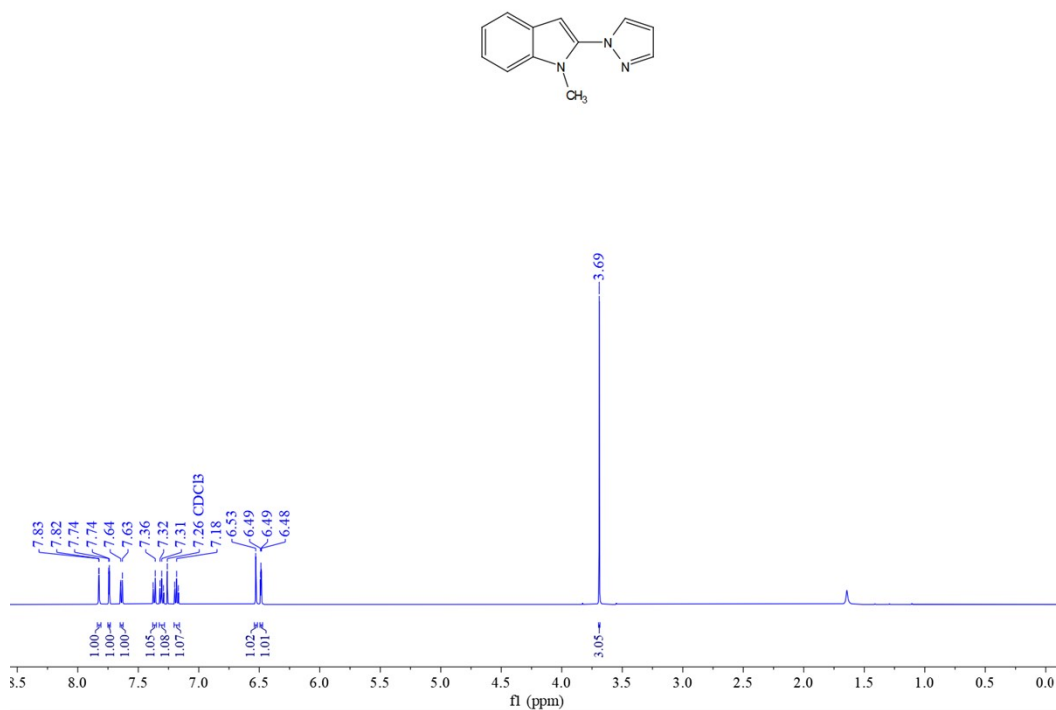

(5)  $^1\text{H-NMR}$  (500 MHz,  $\text{CDCl}_3$ ) spectrum of 4aaa

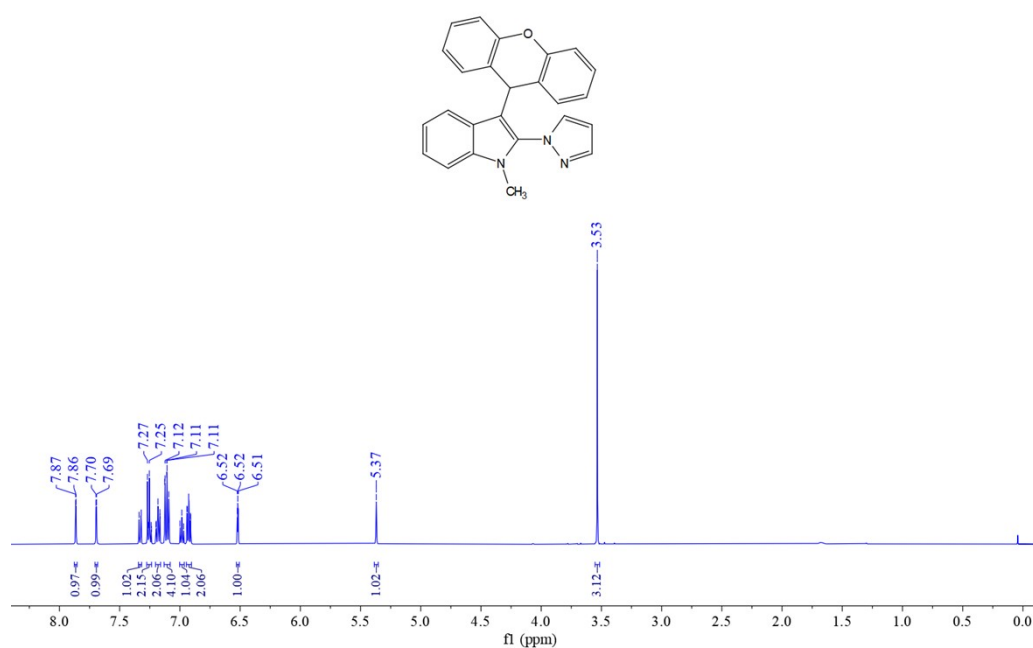

(6)  $^{13}\text{C-NMR}$  (125 MHz,  $\text{CDCl}_3$ ) spectrum of 4aaa

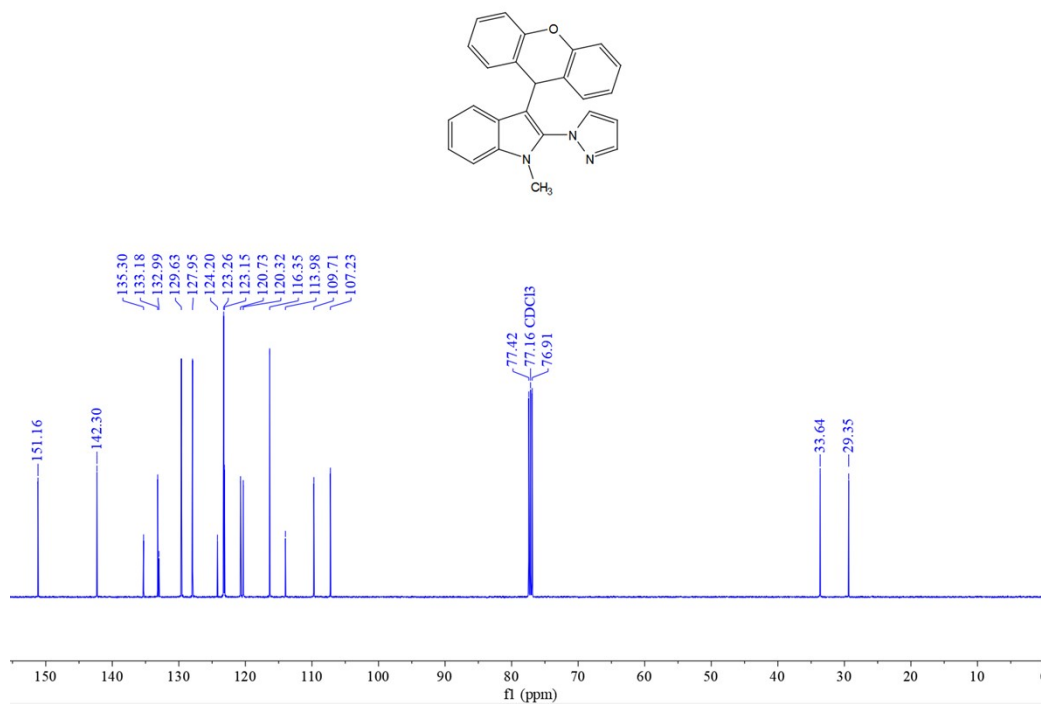

(7)  $^1\text{H-NMR}$  (500 MHz,  $\text{CDCl}_3$ ) spectrum of 4baa

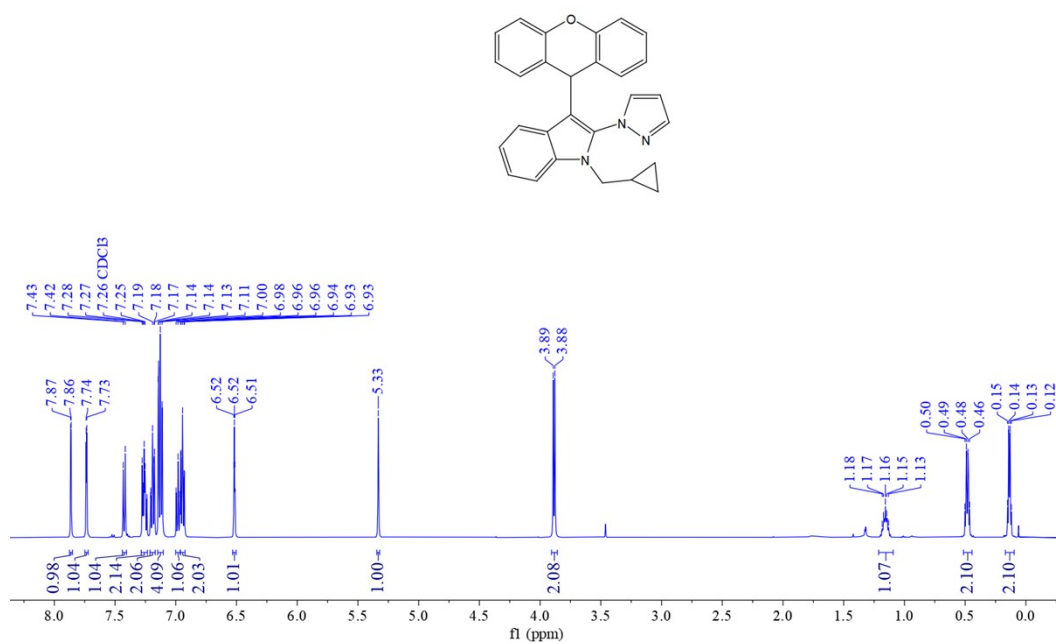

(8)  $^{13}\text{C-NMR}$  (125 MHz,  $\text{CDCl}_3$ ) spectrum of 4baa

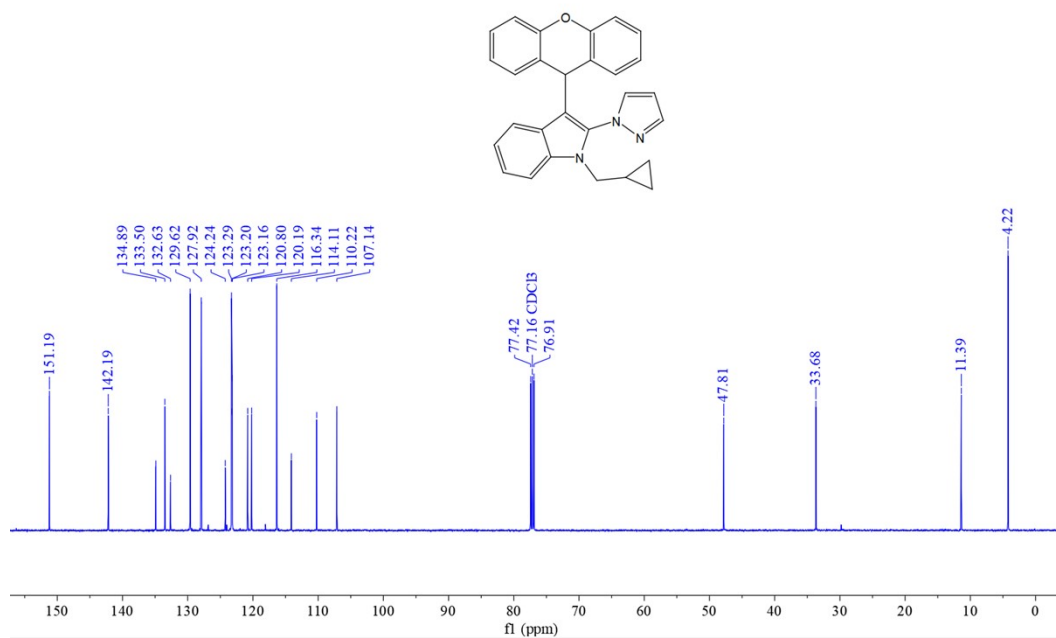

(9)  $^1\text{H-NMR}$  (500 MHz,  $\text{CDCl}_3$ ) spectrum of 4caa

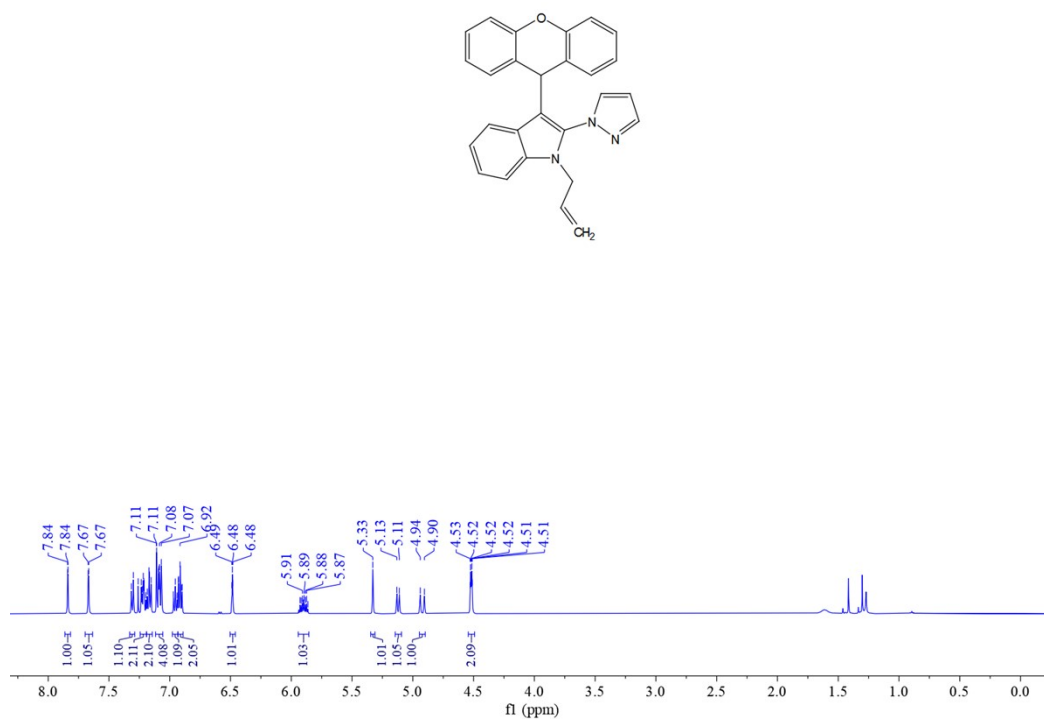

(10)  $^{13}\text{C-NMR}$  (125 MHz,  $\text{CDCl}_3$ ) spectrum of 4caa

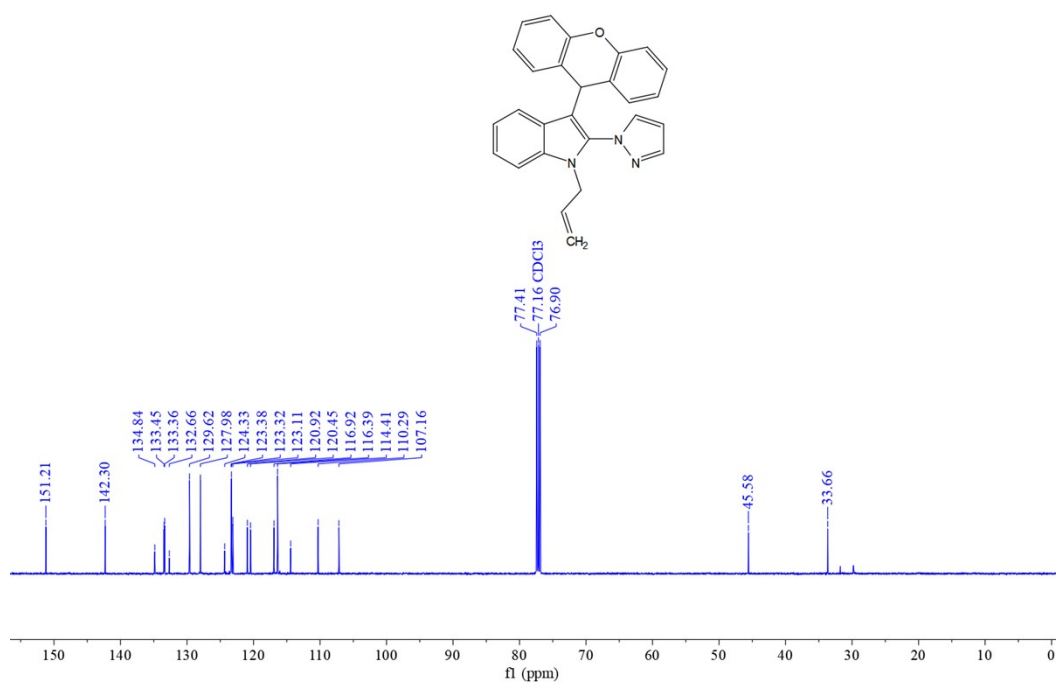

(11)  $^1\text{H-NMR}$  (500 MHz,  $\text{CDCl}_3$ ) spectrum of 4daa

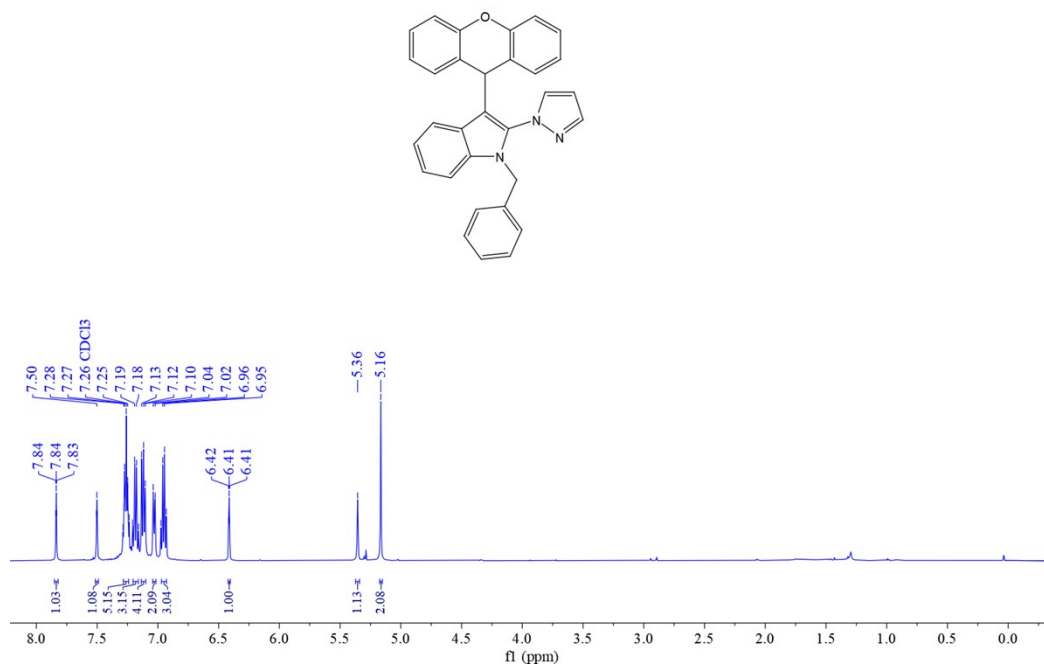

(12)  $^{13}\text{C-NMR}$  (125 MHz,  $\text{CDCl}_3$ ) spectrum of 4daa

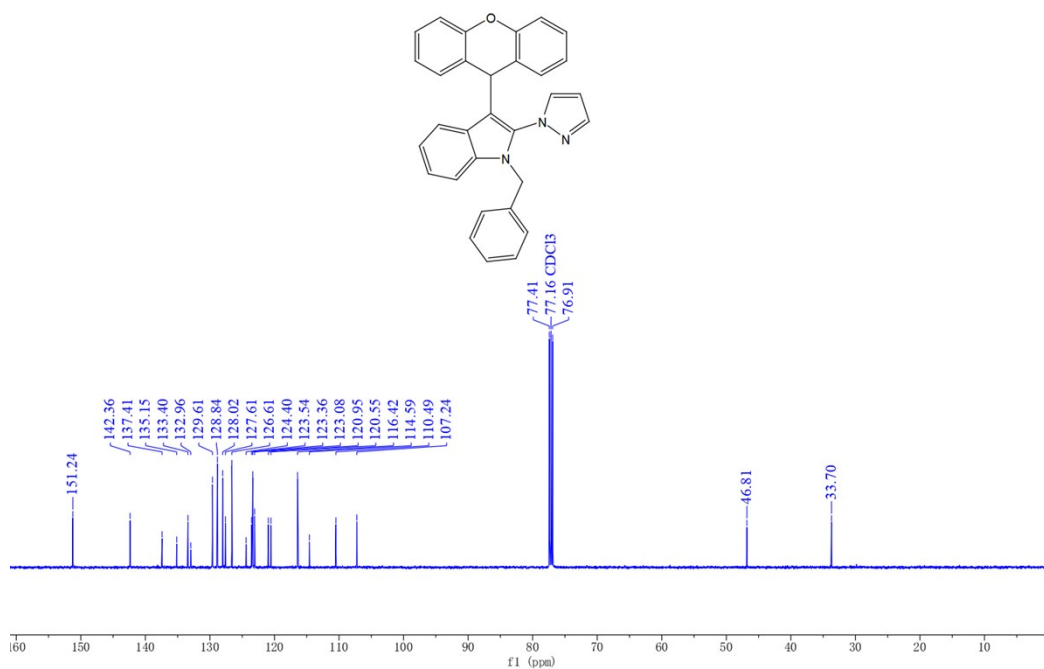

(13)  $^1\text{H-NMR}$  (500 MHz,  $\text{CDCl}_3$ ) spectrum of 4eaa

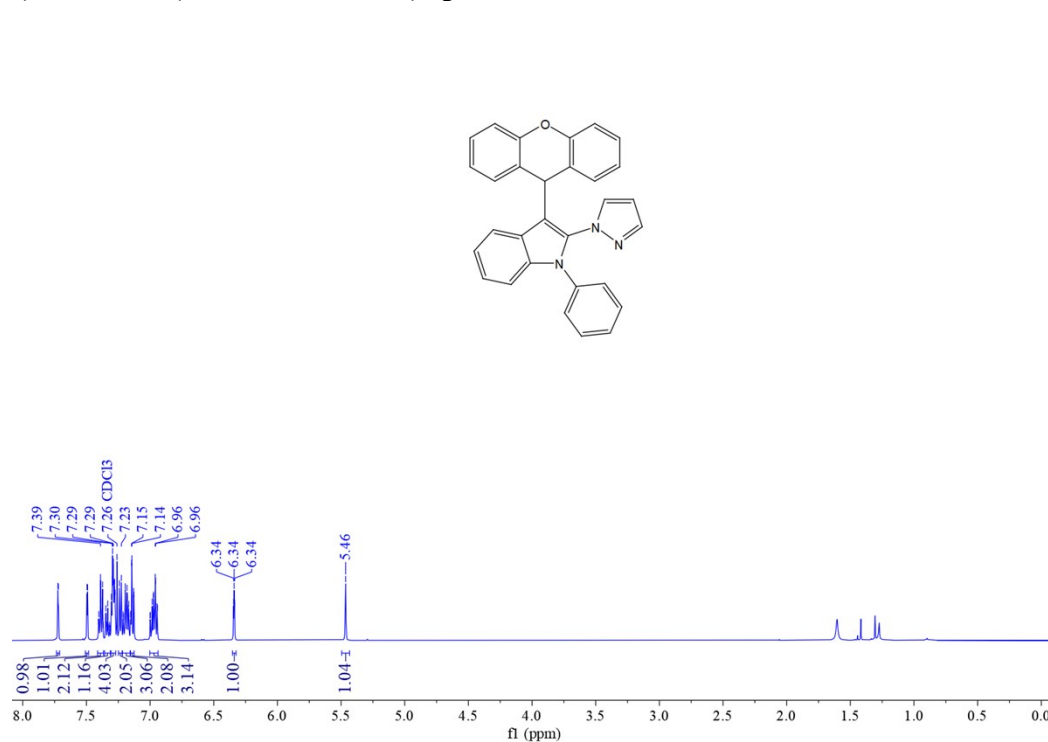

(14)  $^{13}\text{C-NMR}$  (125 MHz,  $\text{CDCl}_3$ ) spectrum of 4eaa

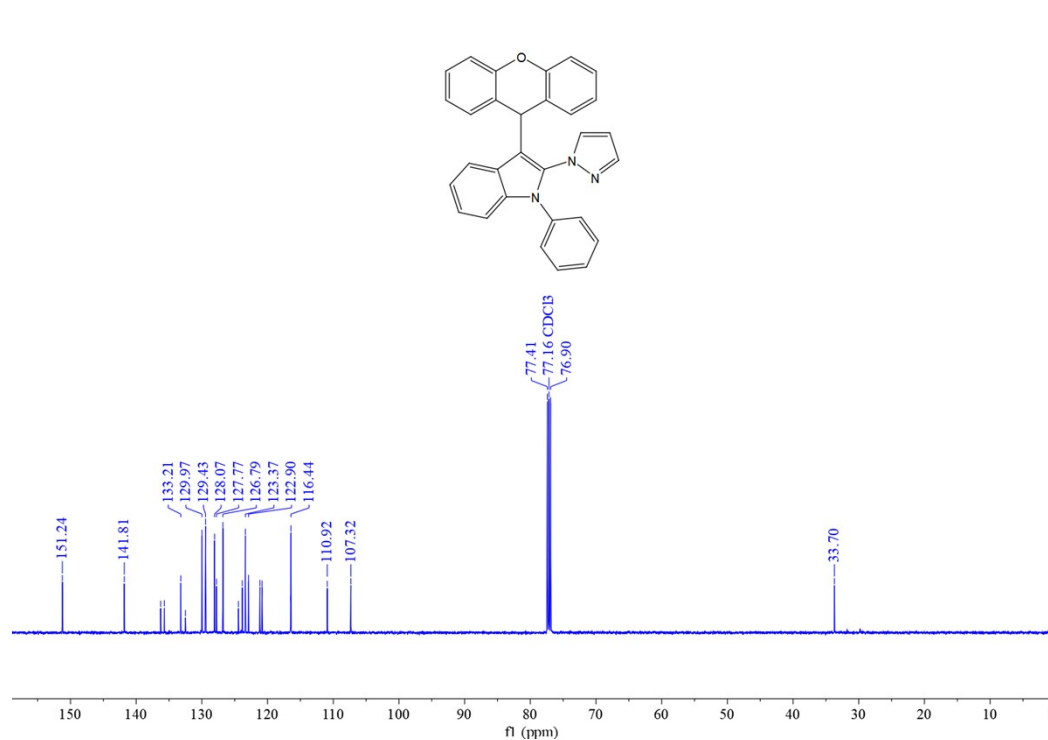

(15)  $^1\text{H-NMR}$  (500 MHz,  $\text{CDCl}_3$ ) spectrum of 4faa

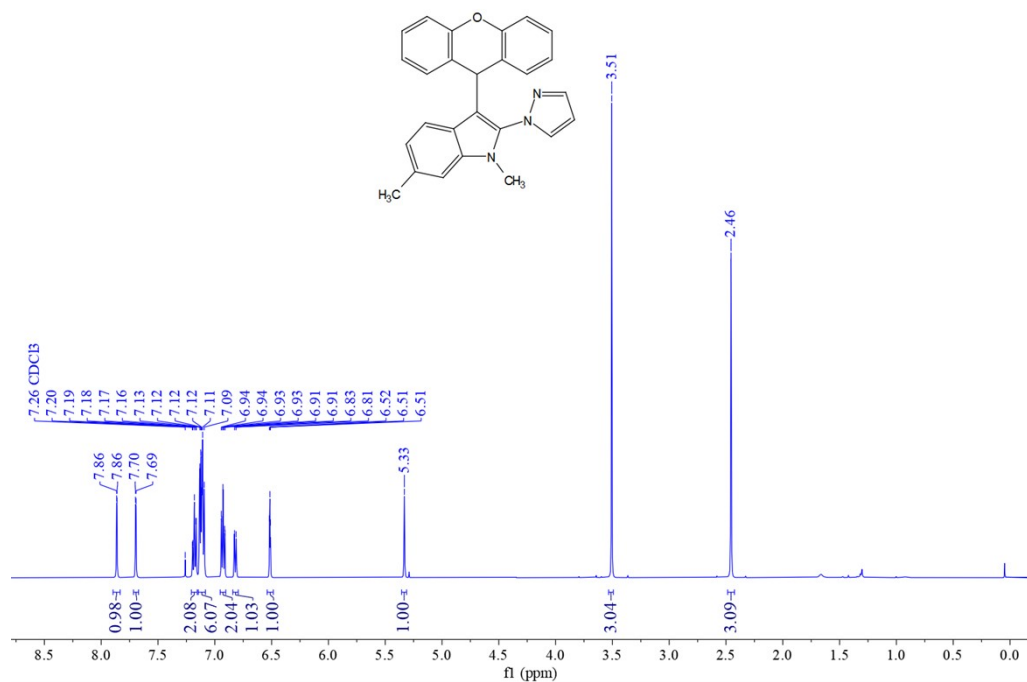

(16)  $^{13}\text{C-NMR}$  (125 MHz,  $\text{CDCl}_3$ ) spectrum of 4faa

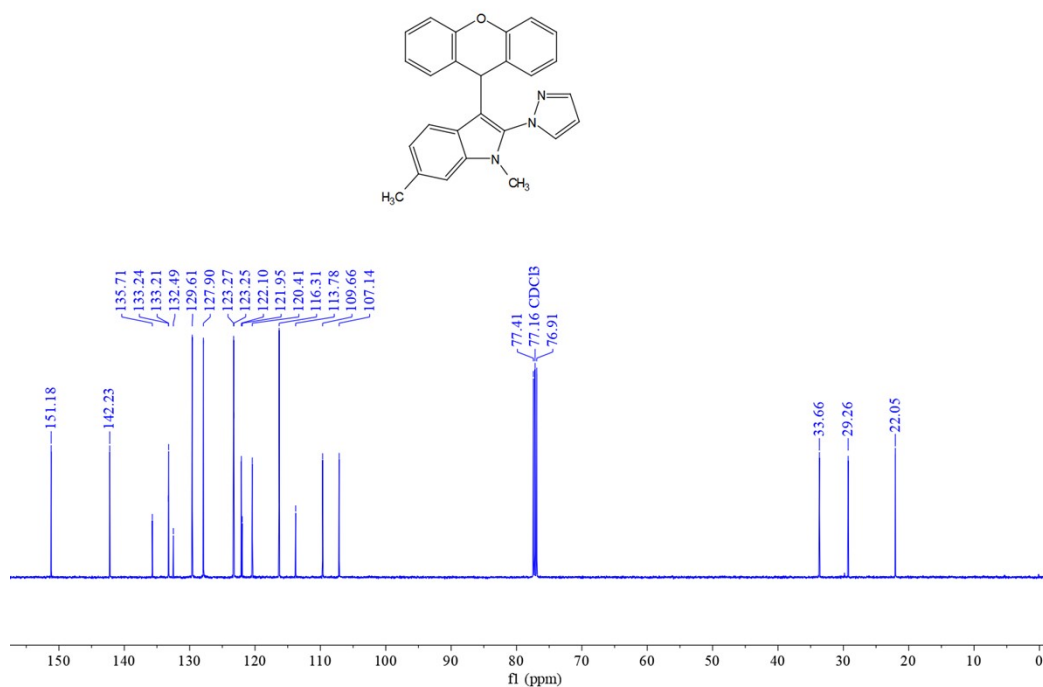



(17) <sup>1</sup>H-NMR (500 MHz, CDCl<sub>3</sub>) spectrum of 4gaa

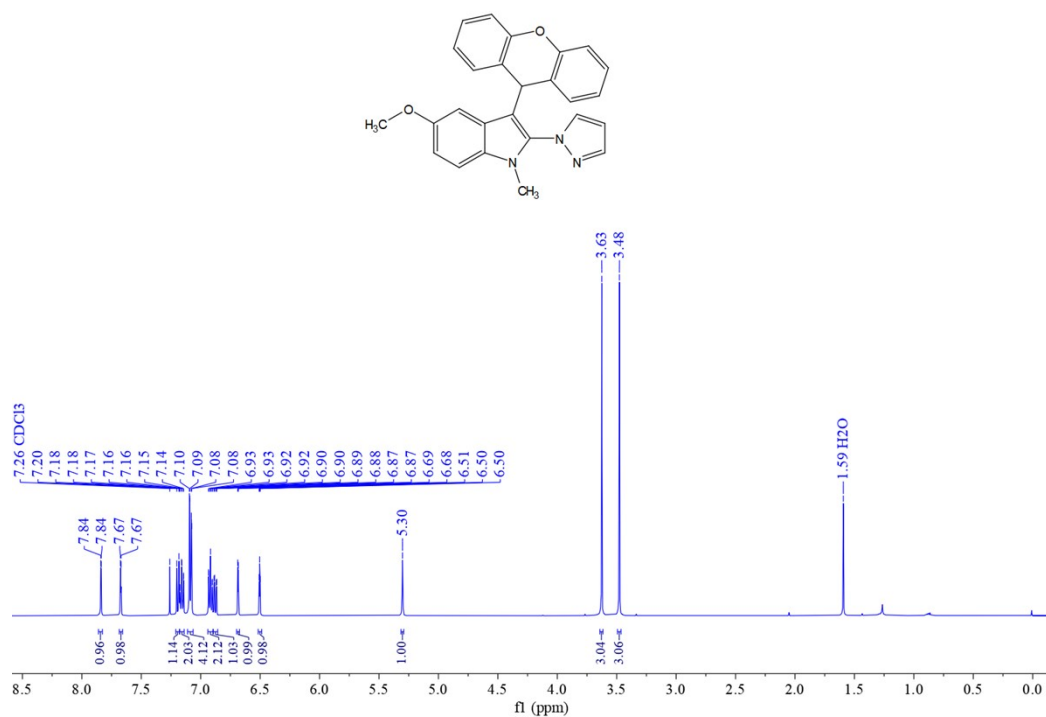

(18) <sup>13</sup>C-NMR (125 MHz, CDCl<sub>3</sub>) spectrum of 4gaa

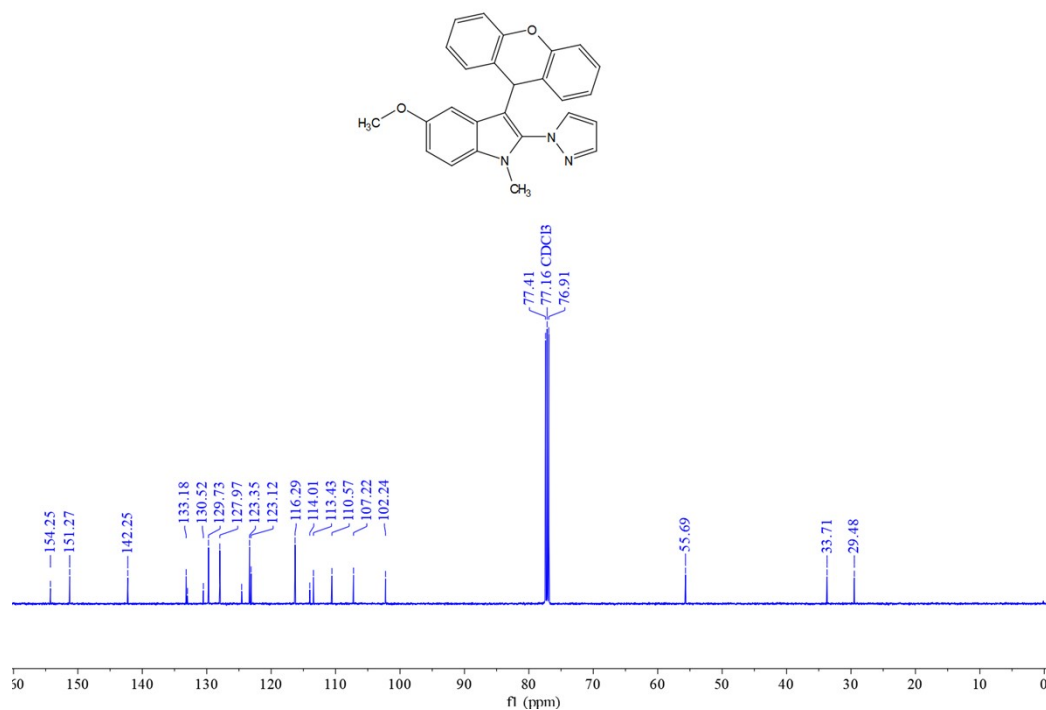

(19)  $^1\text{H-NMR}$  (500 MHz,  $\text{CDCl}_3$ ) spectrum of 4haa

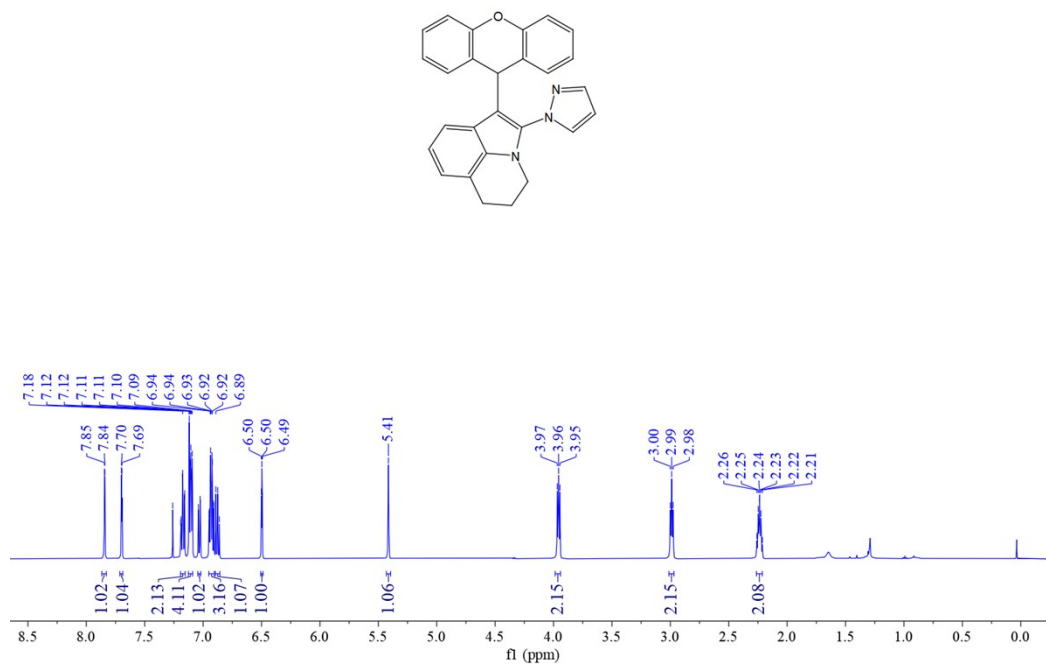

(20)  $^{13}\text{C-NMR}$  (125 MHz,  $\text{CDCl}_3$ ) spectrum of 4haa

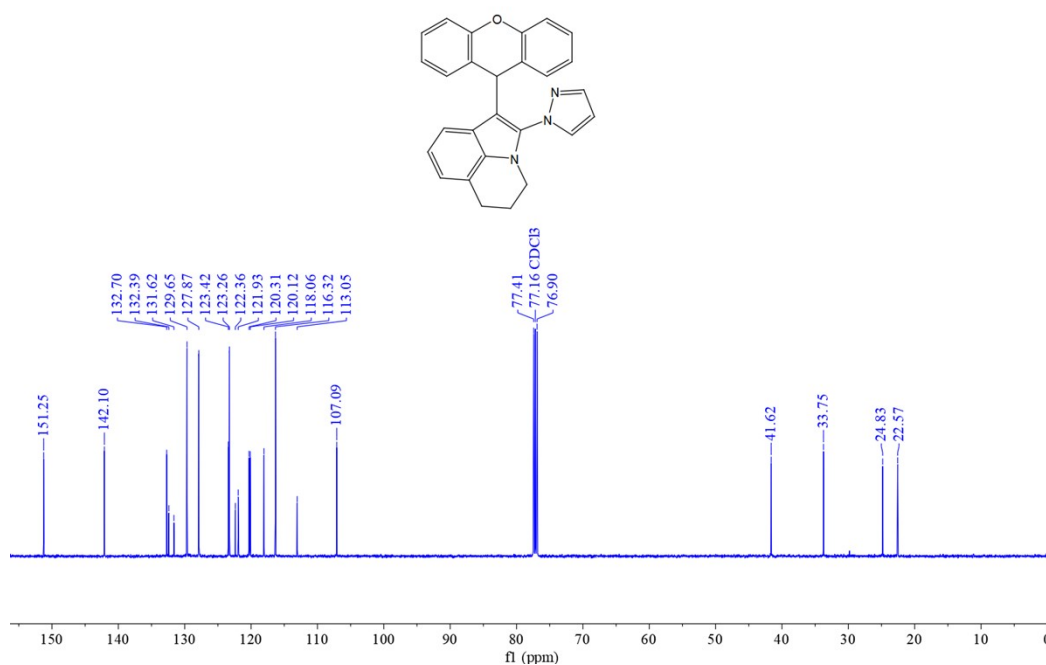

(21)  $^1\text{H-NMR}$  (500 MHz,  $\text{CDCl}_3$ ) spectrum of 4iaa

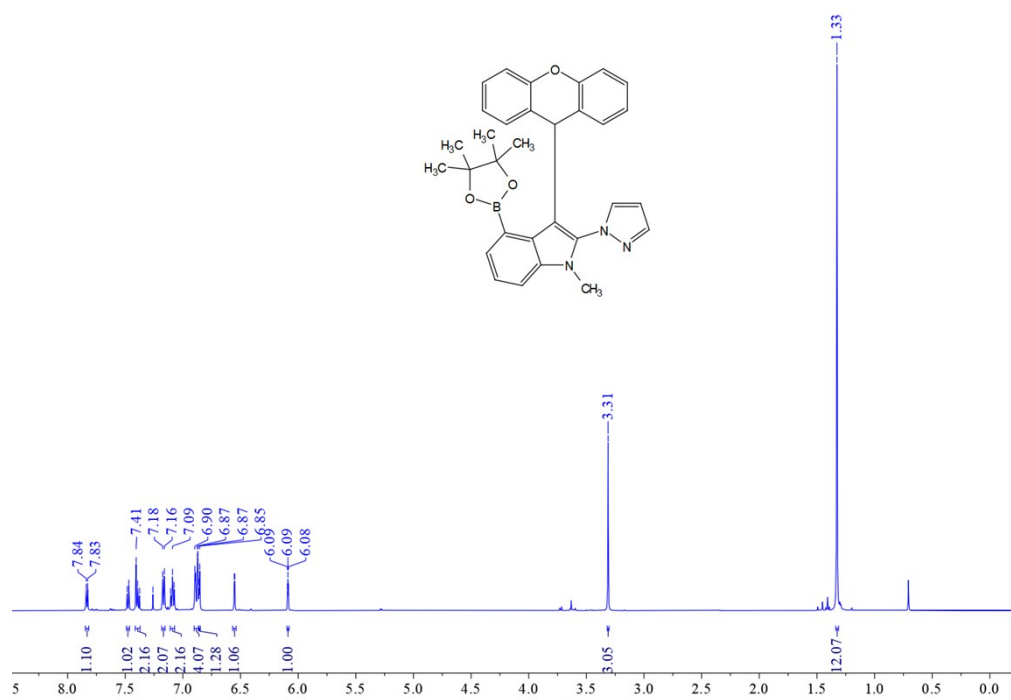

(22)  $^{13}\text{C-NMR}$  (125 MHz,  $\text{CDCl}_3$ ) spectrum of 4iaa

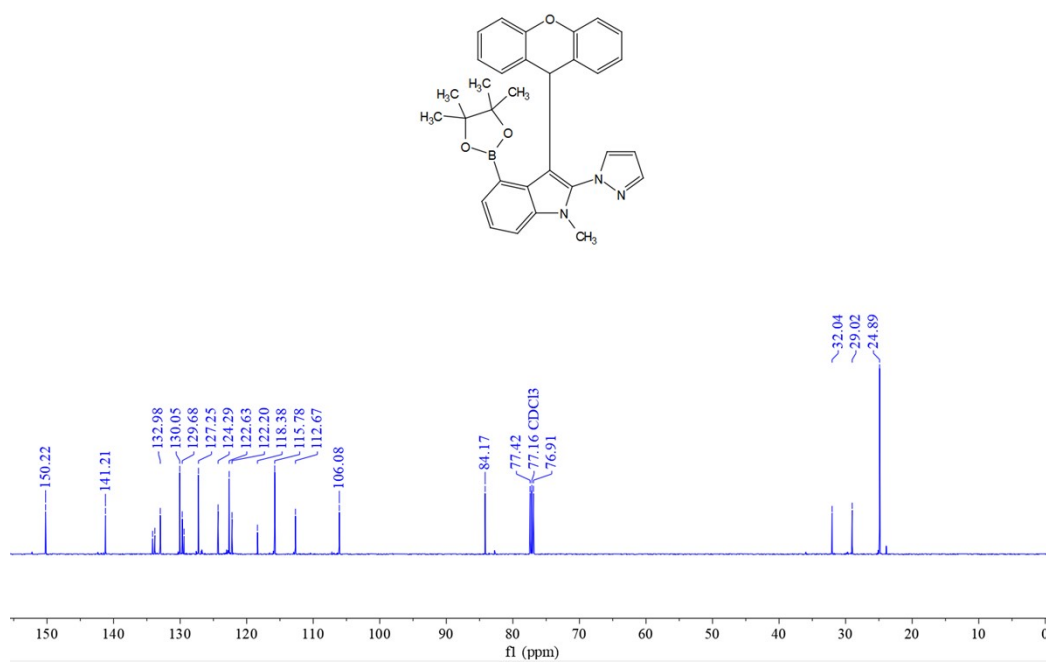

(23)  $^1\text{H-NMR}$  (500 MHz,  $\text{CDCl}_3$ ) spectrum of 4jaa

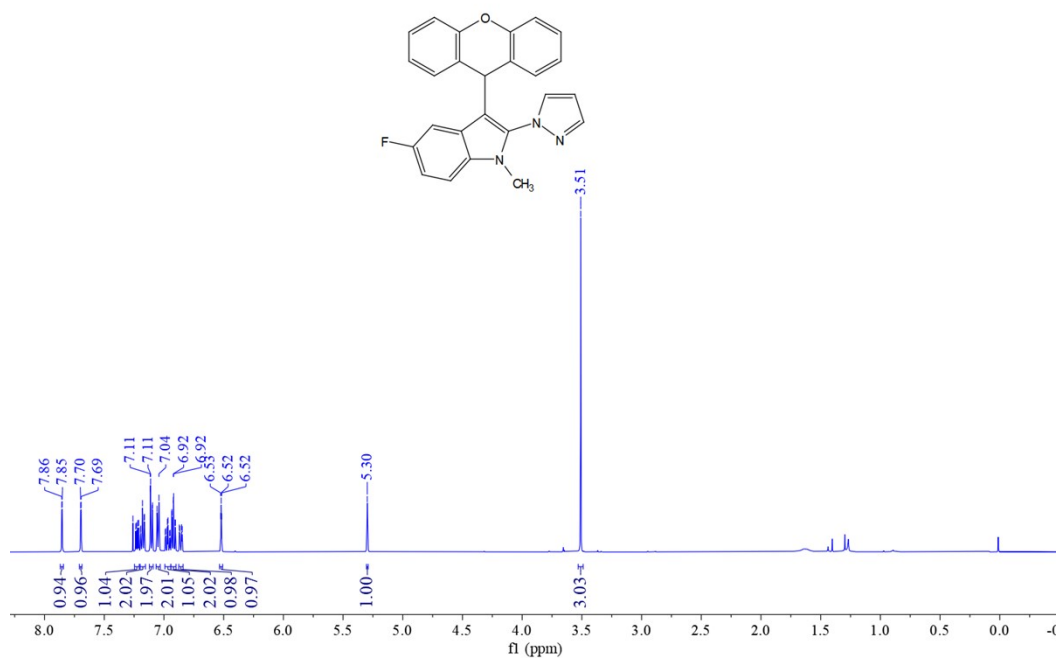

(24)  $^{13}\text{C-NMR}$  (125 MHz,  $\text{CDCl}_3$ ) spectrum of 4jaa

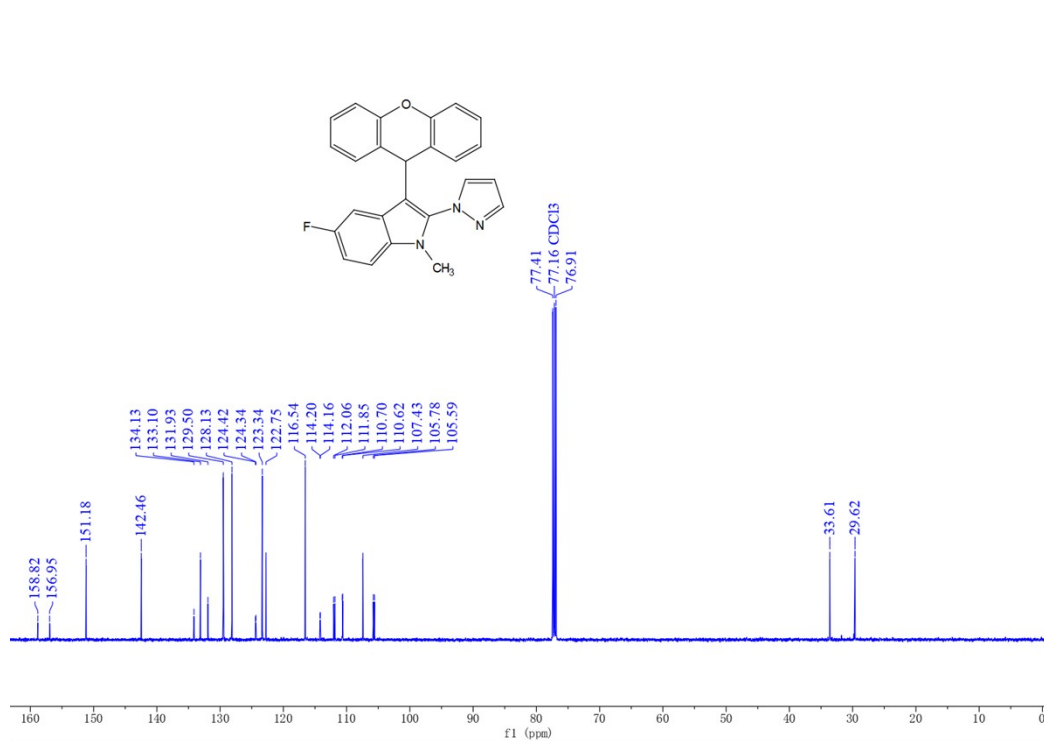

(25)  $^{19}\text{F}$ -NMR (470 MHz,  $\text{CDCl}_3$ ) spectrum of 4jaa

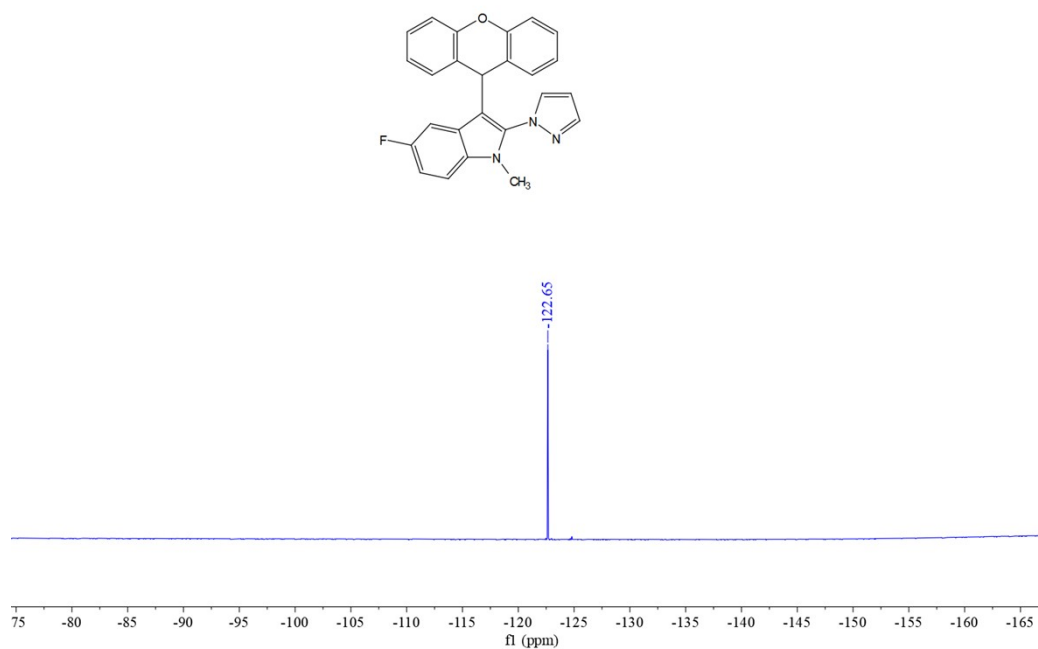

(26)  $^1\text{H}$ -NMR (500 MHz,  $\text{CDCl}_3$ ) spectrum of 4kaa

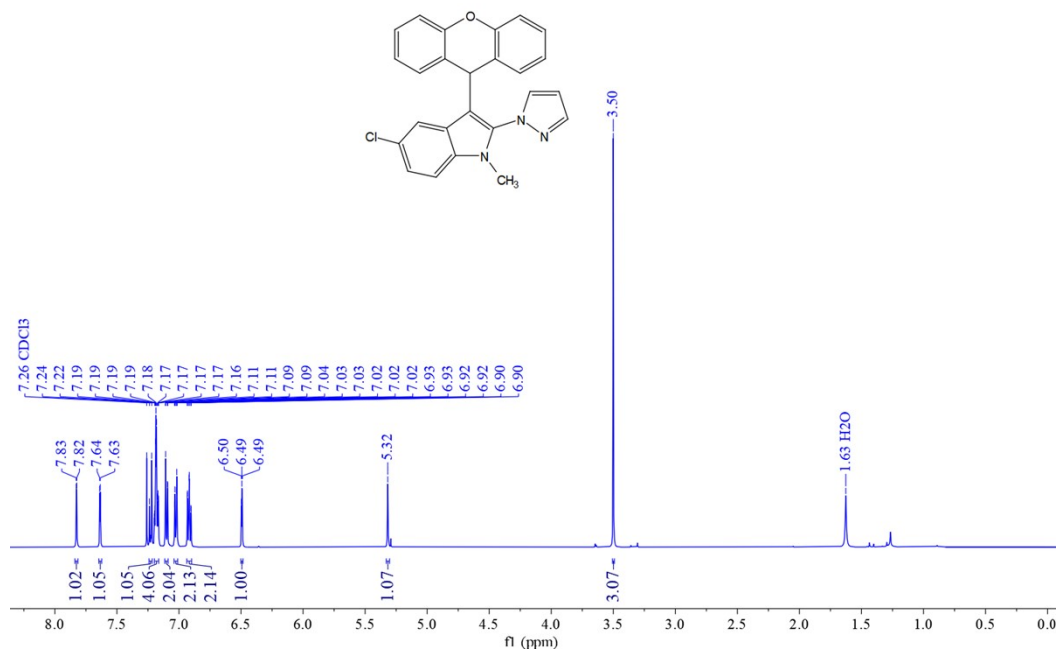

(27)  $^{13}\text{C}$ -NMR (125 MHz,  $\text{CDCl}_3$ ) spectrum of 4kaa

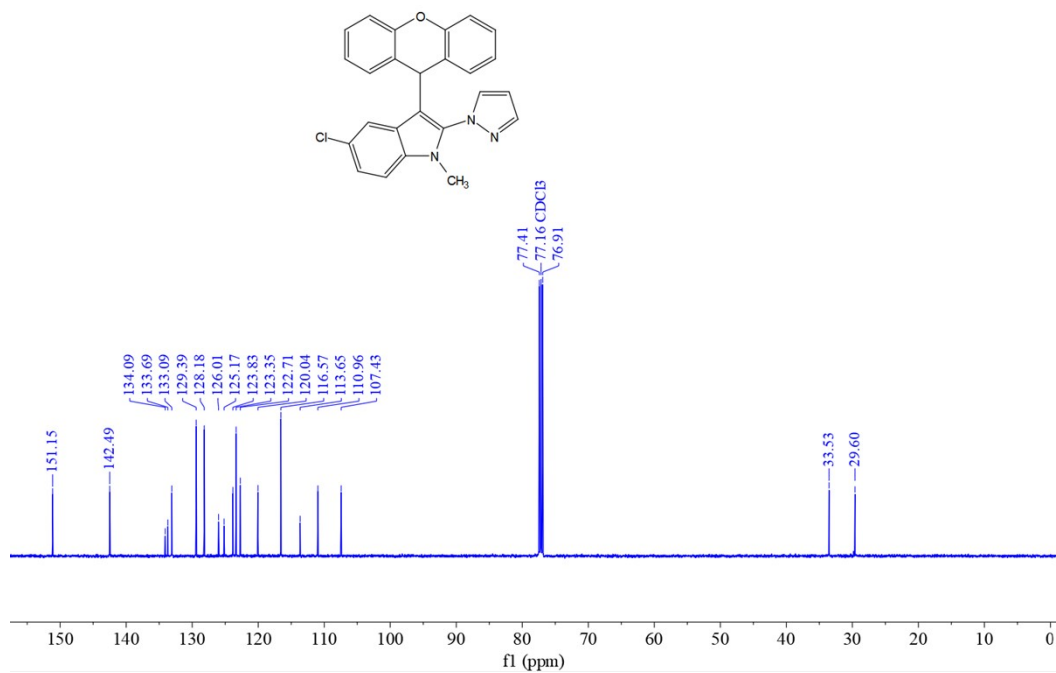

(28)  $^1\text{H}$ -NMR (500 MHz,  $\text{CDCl}_3$ ) spectrum of 4laa

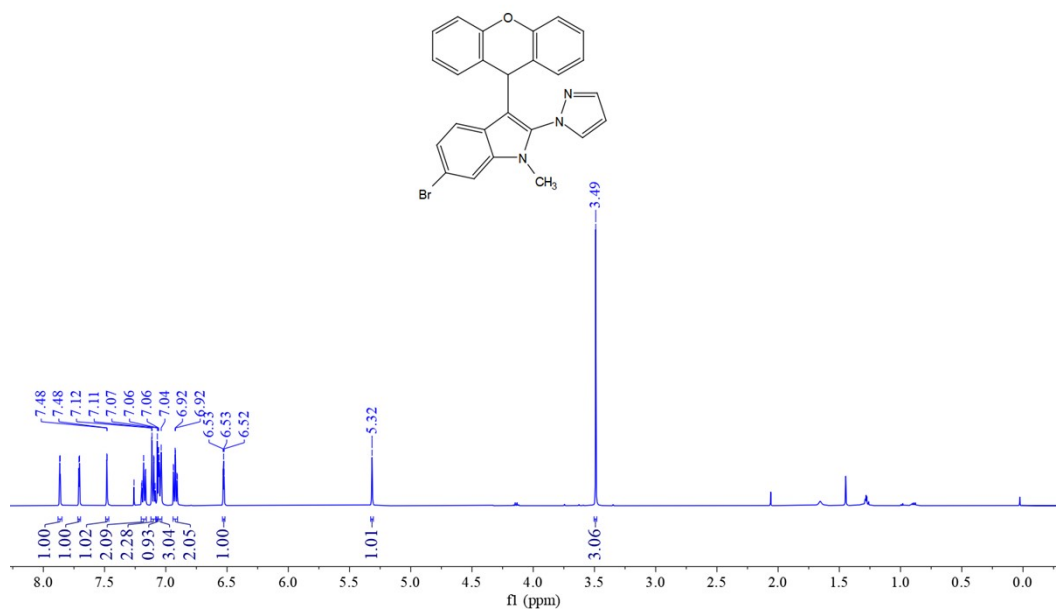

(29)  $^{13}\text{C}$ -NMR (125 MHz,  $\text{CDCl}_3$ ) spectrum of 4laa

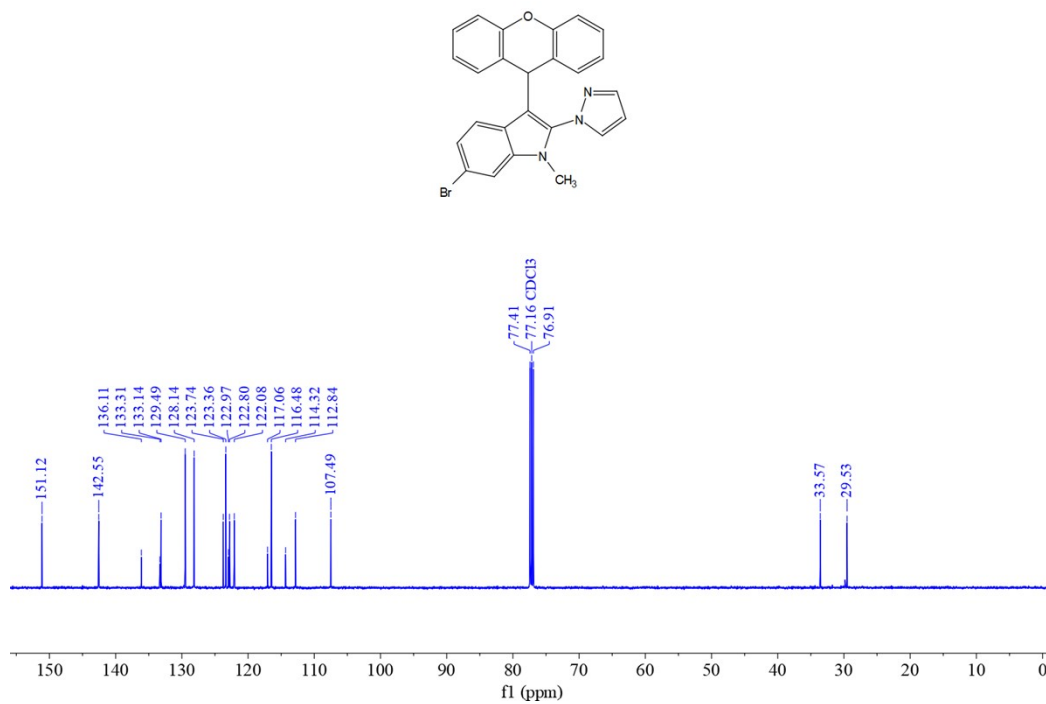

(30)  $^1\text{H}$ -NMR (500 MHz,  $\text{CDCl}_3$ ) spectrum of 4maa

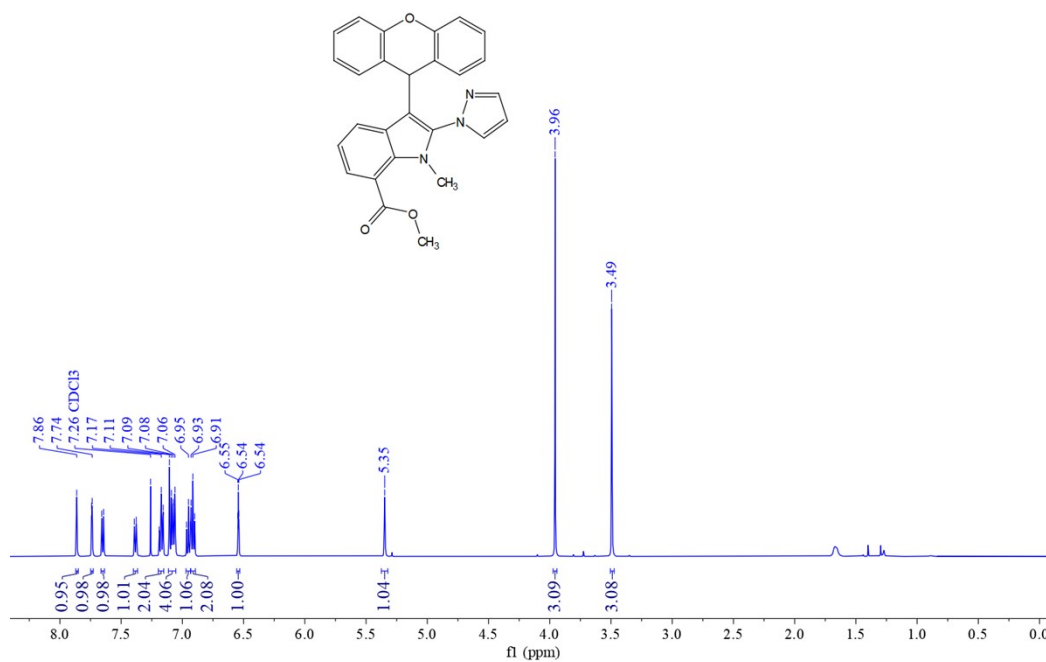

**(31)  $^{13}\text{C}$ -NMR (125 MHz,  $\text{CDCl}_3$ ) spectrum of 4maa**

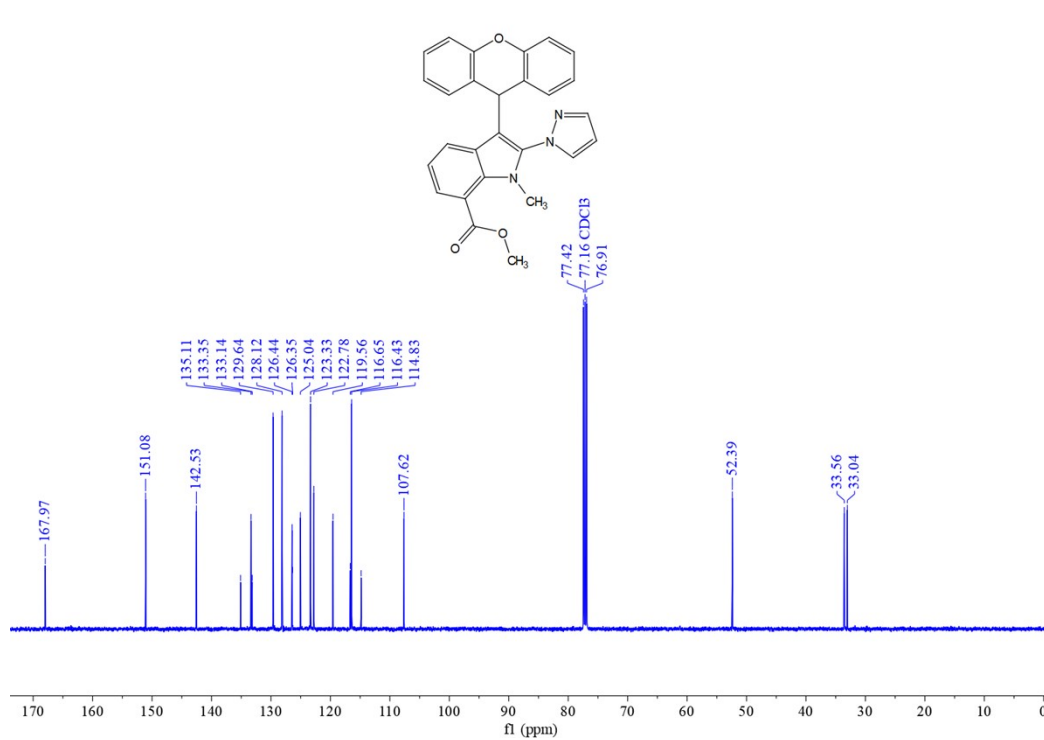

**(32)  $^1\text{H}$ -NMR (500 MHz,  $\text{CDCl}_3$ ) spectrum of 4naa**

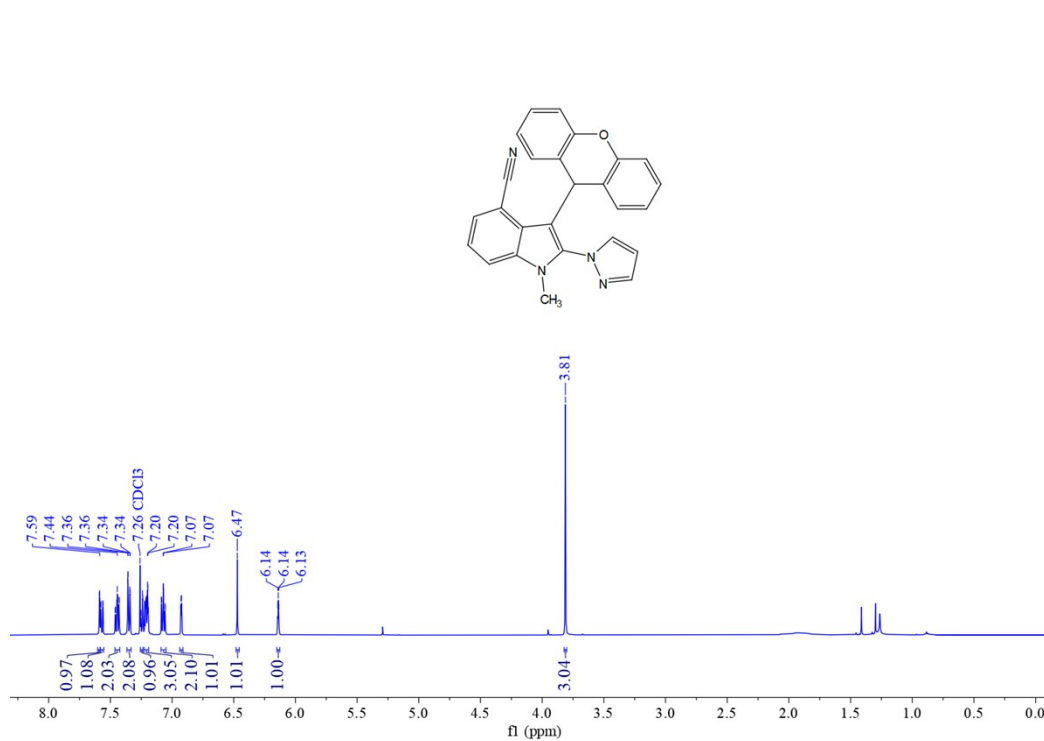



(33)  $^{13}\text{C}$ -NMR (125 MHz,  $\text{CDCl}_3$ ) spectrum of 4naa

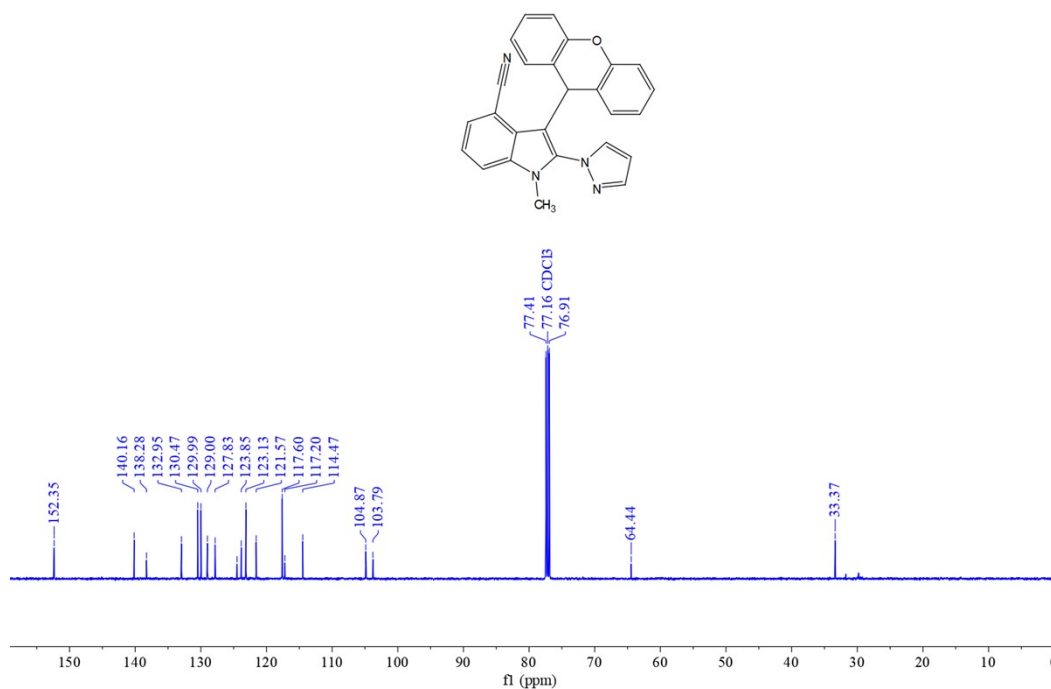

(34)  $^1\text{H}$ -NMR (500 MHz,  $\text{CDCl}_3$ ) spectrum of 4oaa

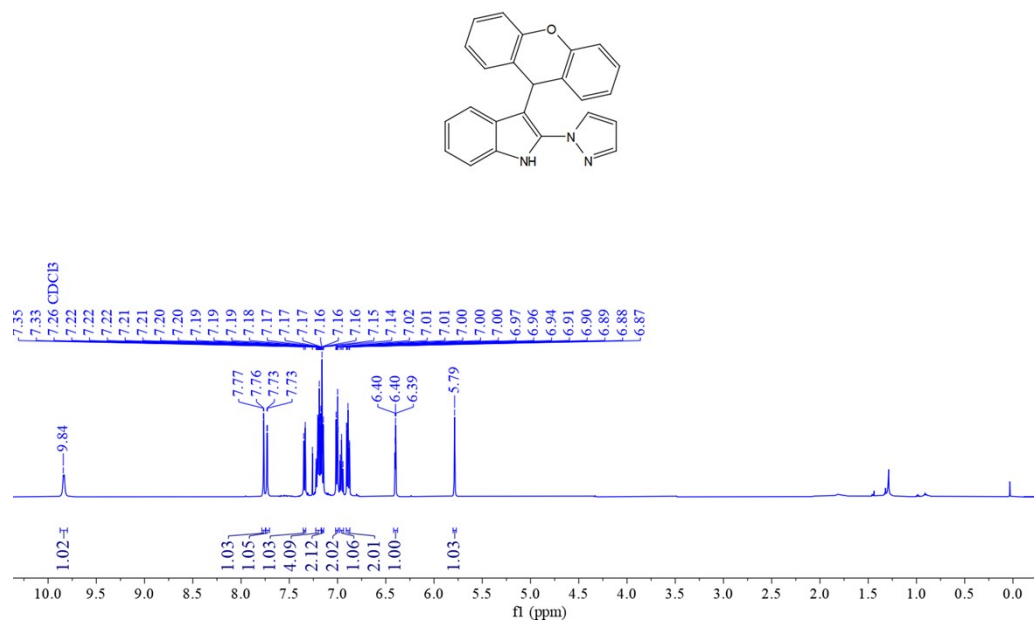

**(35)  $^{13}\text{C}$ -NMR (125 MHz,  $\text{CDCl}_3$ ) spectrum of 4oaa**

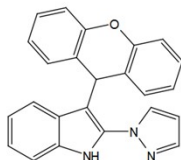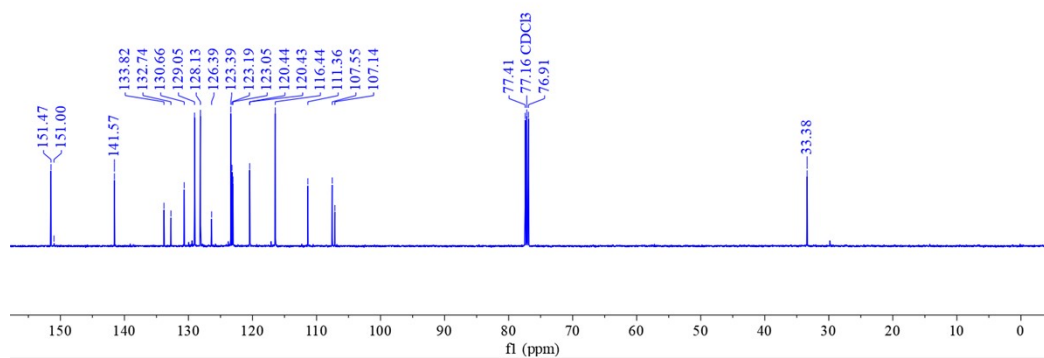

**(36)  $^1\text{H}$ -NMR (500 MHz,  $\text{CDCl}_3$ ) spectrum of 4paa**

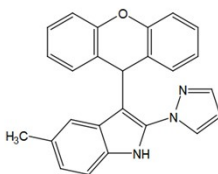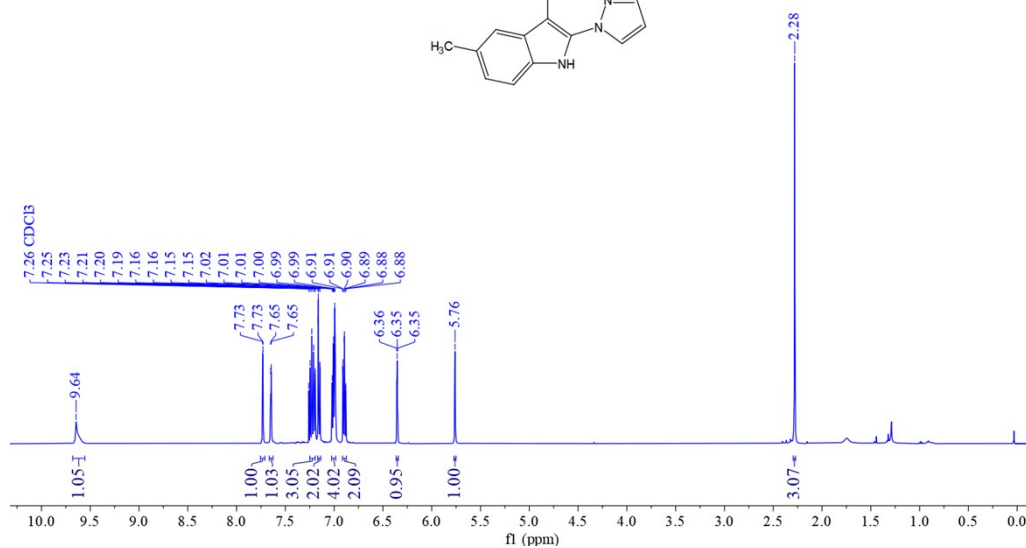

(37)  $^{13}\text{C}$ -NMR (125 MHz,  $\text{CDCl}_3$ ) spectrum of 4paa

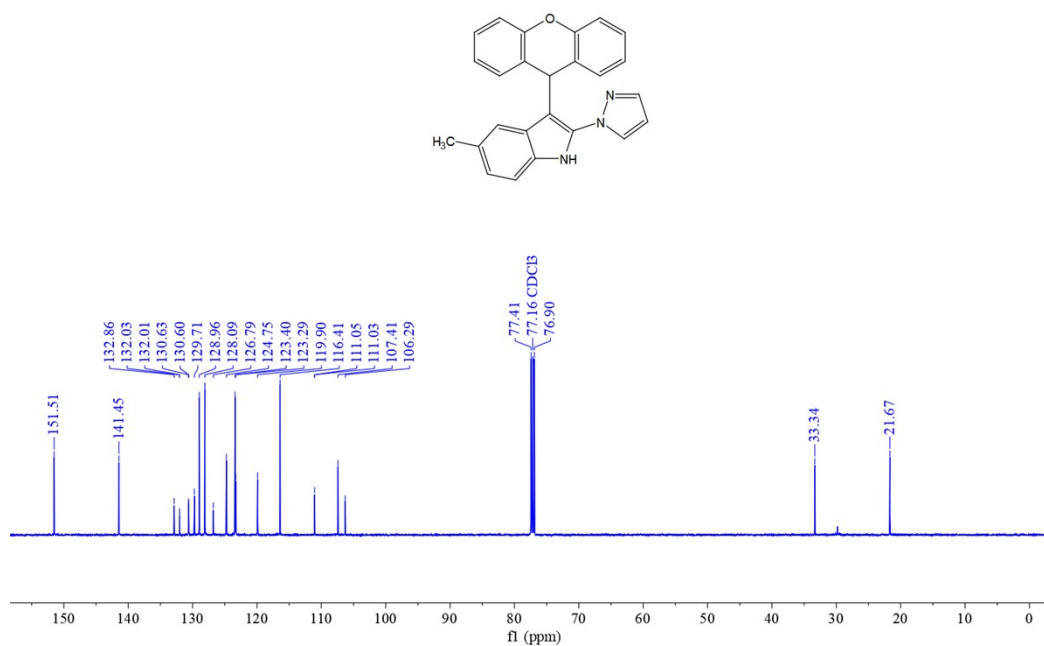

(38)  $^1\text{H}$ -NMR (500 MHz,  $\text{CDCl}_3$ ) spectrum of 4qaa

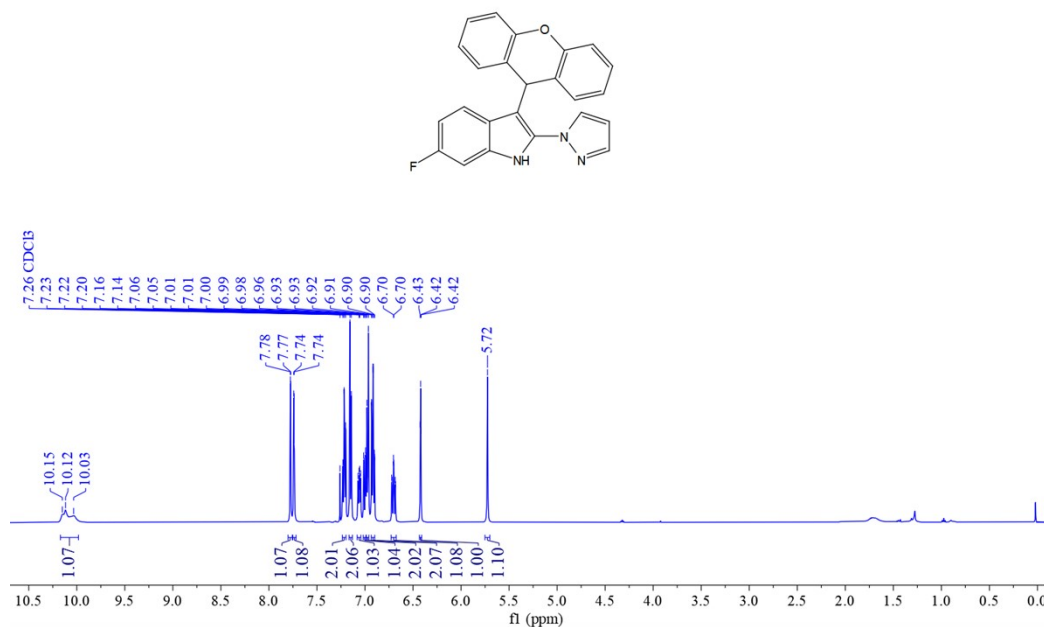

**(39)  $^{13}\text{C}$ -NMR (125 MHz,  $\text{CDCl}_3$ ) spectrum of 4qaa**

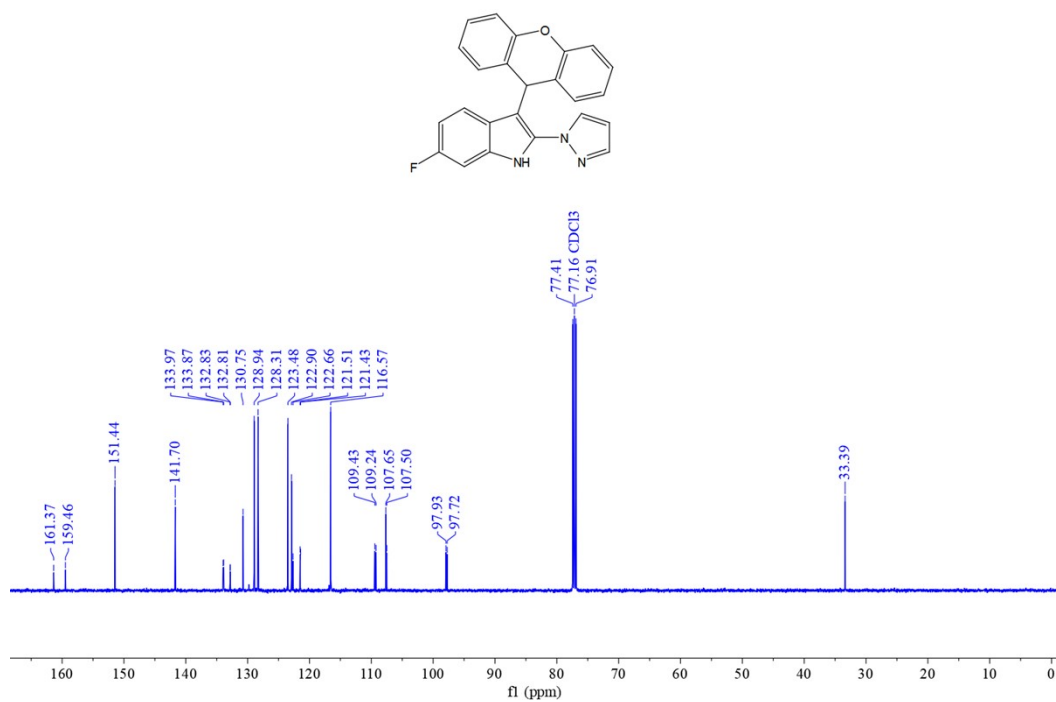

**(40)  $^{19}\text{F}$ -NMR (470 MHz,  $\text{CDCl}_3$ ) spectrum of 4qaa**

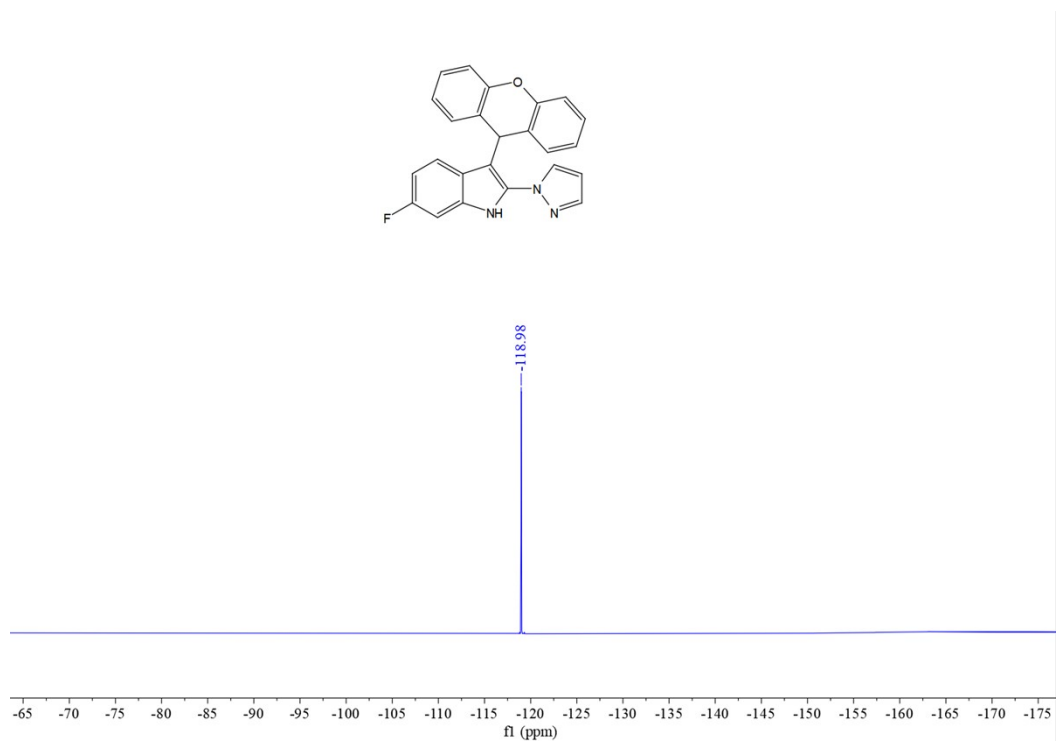

**(41)  $^1\text{H-NMR}$  (500 MHz,  $\text{CDCl}_3$ ) spectrum of 4raa**

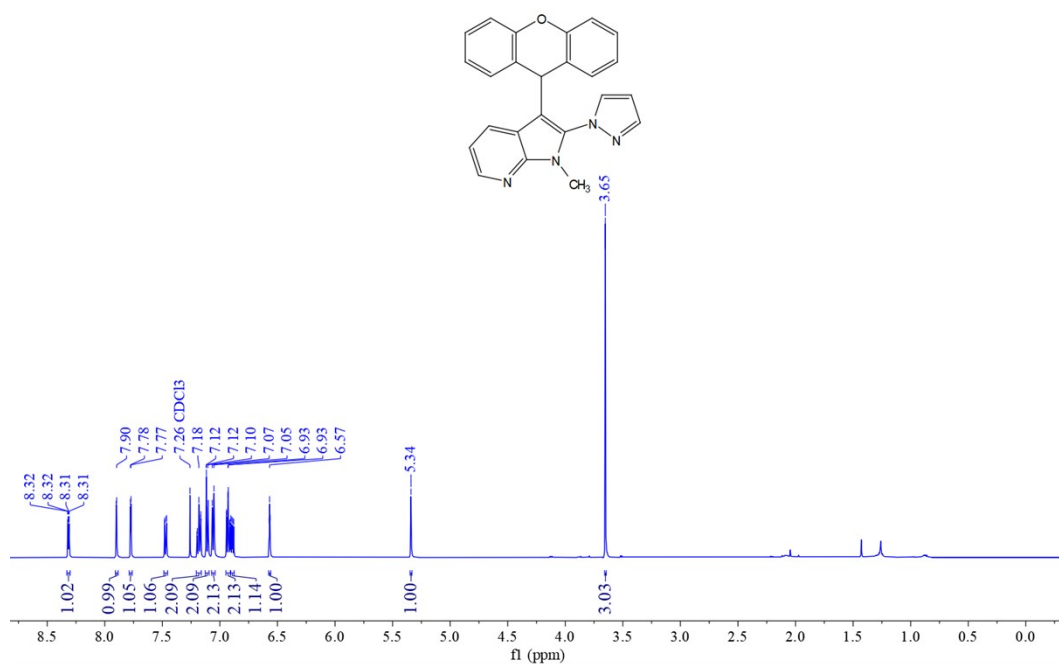

**(42)  $^{13}\text{C-NMR}$  (125 MHz,  $\text{CDCl}_3$ ) spectrum of 4raa**

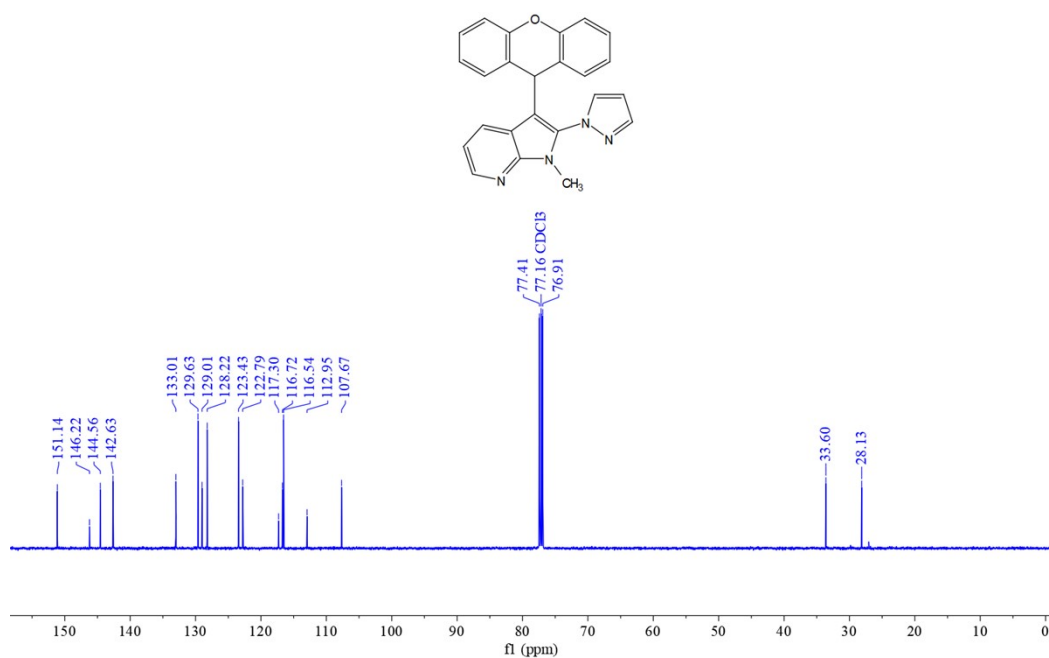

(43) <sup>1</sup>H-NMR (500 MHz, CDCl<sub>3</sub>) spectrum of 4aba

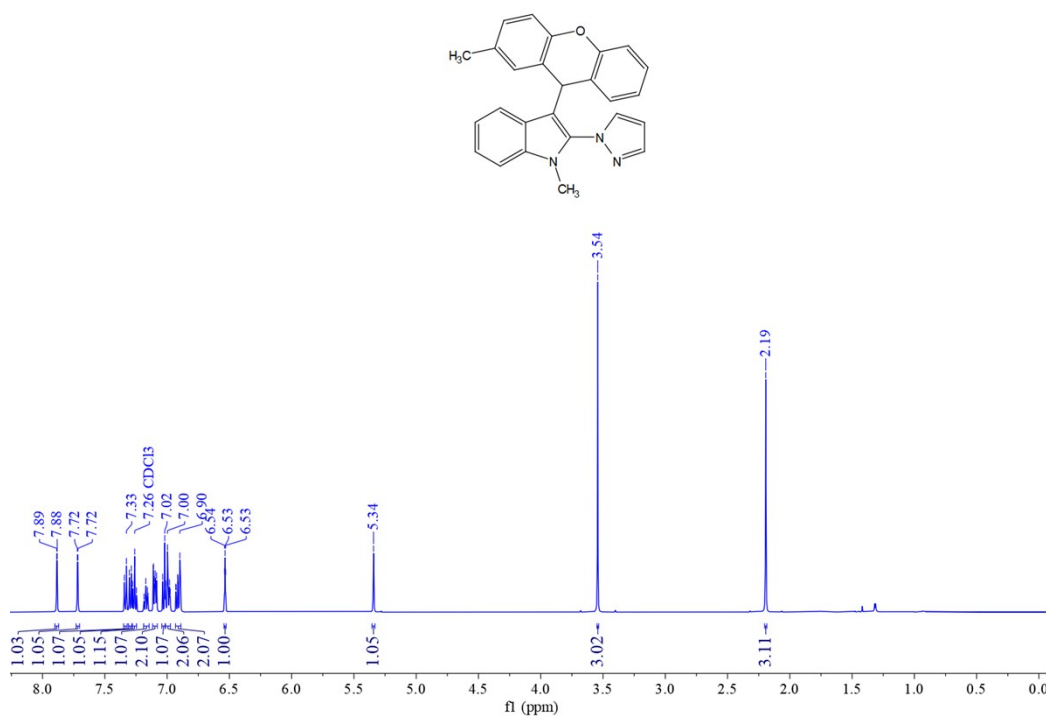

(44) <sup>13</sup>C-NMR (125 MHz, CDCl<sub>3</sub>) spectrum of 4aba

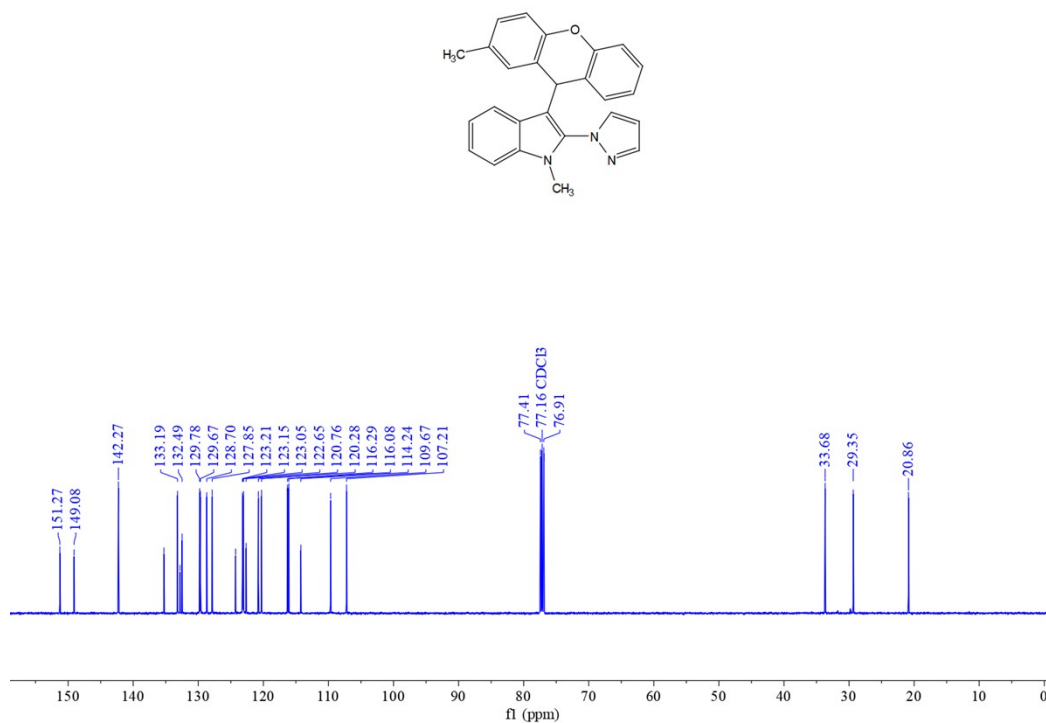

(45)  $^1\text{H-NMR}$  (500 MHz,  $\text{CDCl}_3$ ) spectrum of 4aca

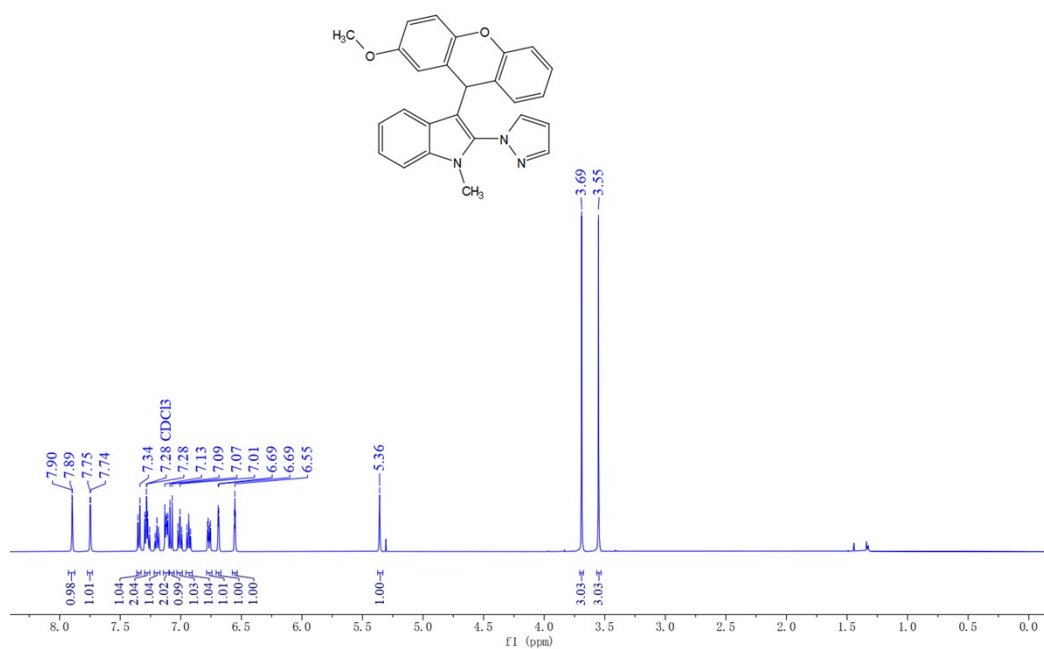

(46)  $^{13}\text{C-NMR}$  (125 MHz,  $\text{CDCl}_3$ ) spectrum of 4aca

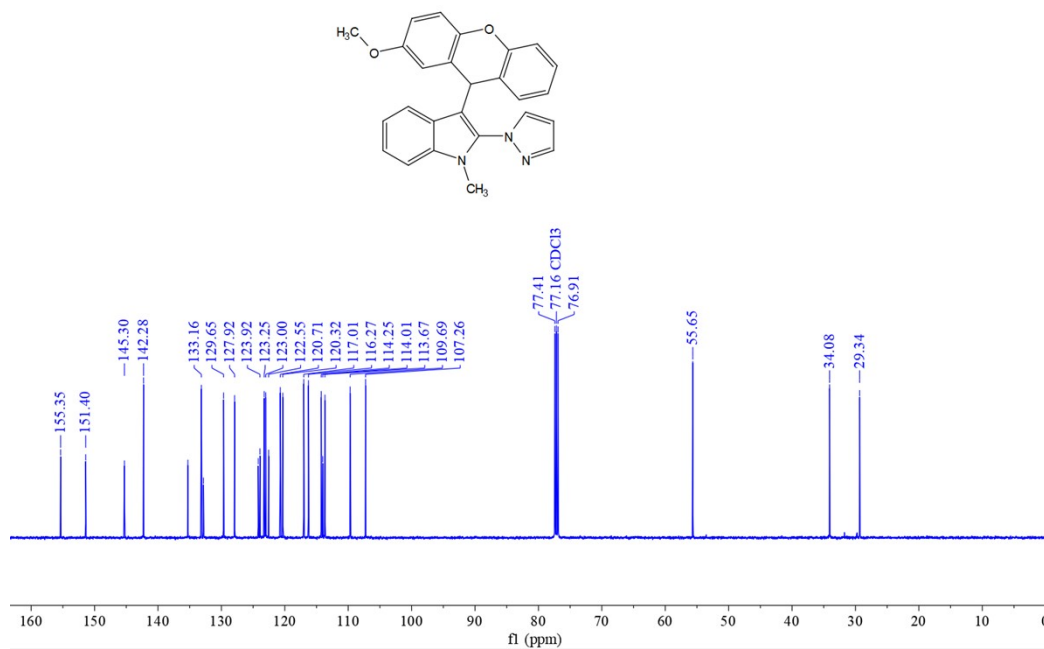

(47) <sup>1</sup>H-NMR (500 MHz, CDCl<sub>3</sub>) spectrum of 4ada

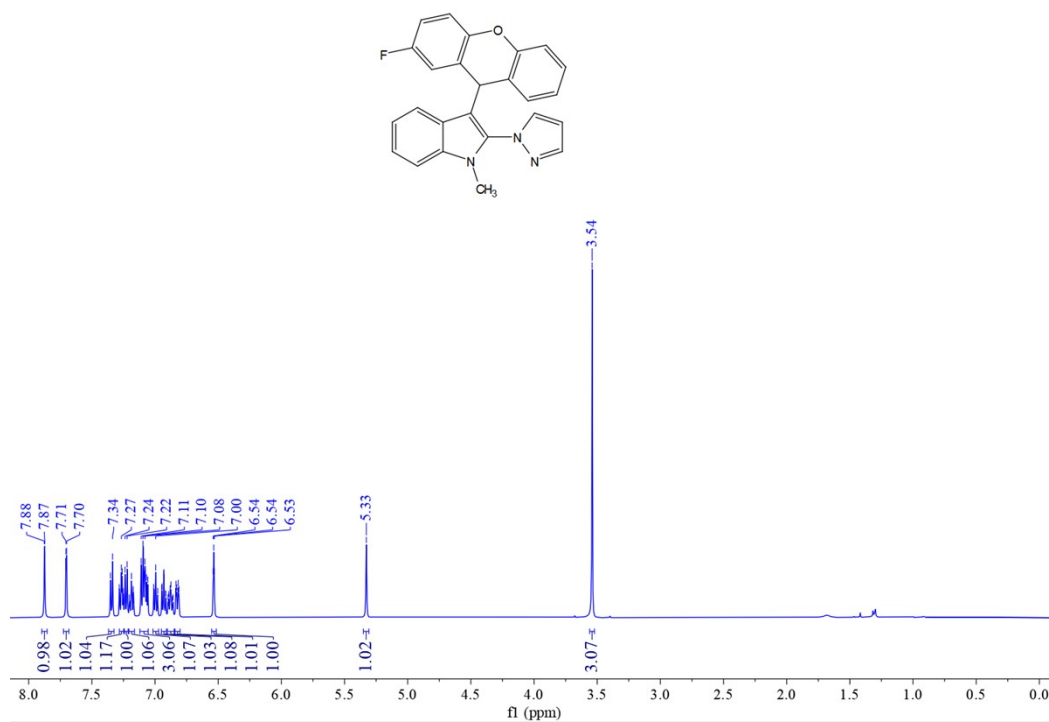

(48) <sup>13</sup>C-NMR (125 MHz, CDCl<sub>3</sub>) spectrum of 4ada

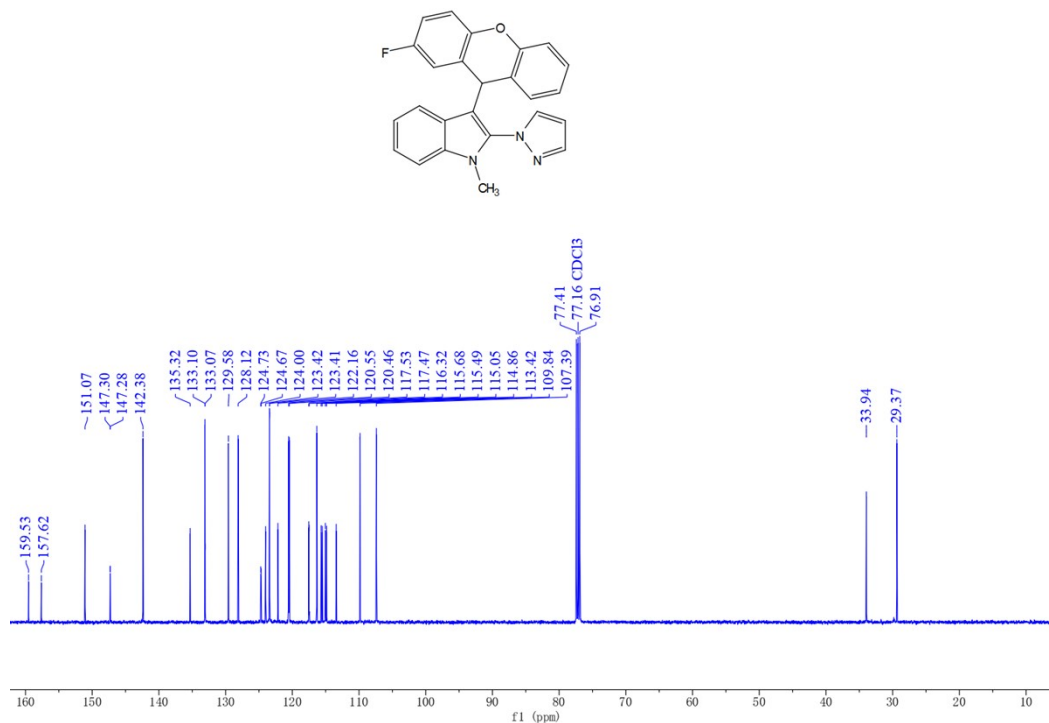



(49)  $^{19}\text{F}$ -NMR (470 MHz,  $\text{CDCl}_3$ ) spectrum of 4ada

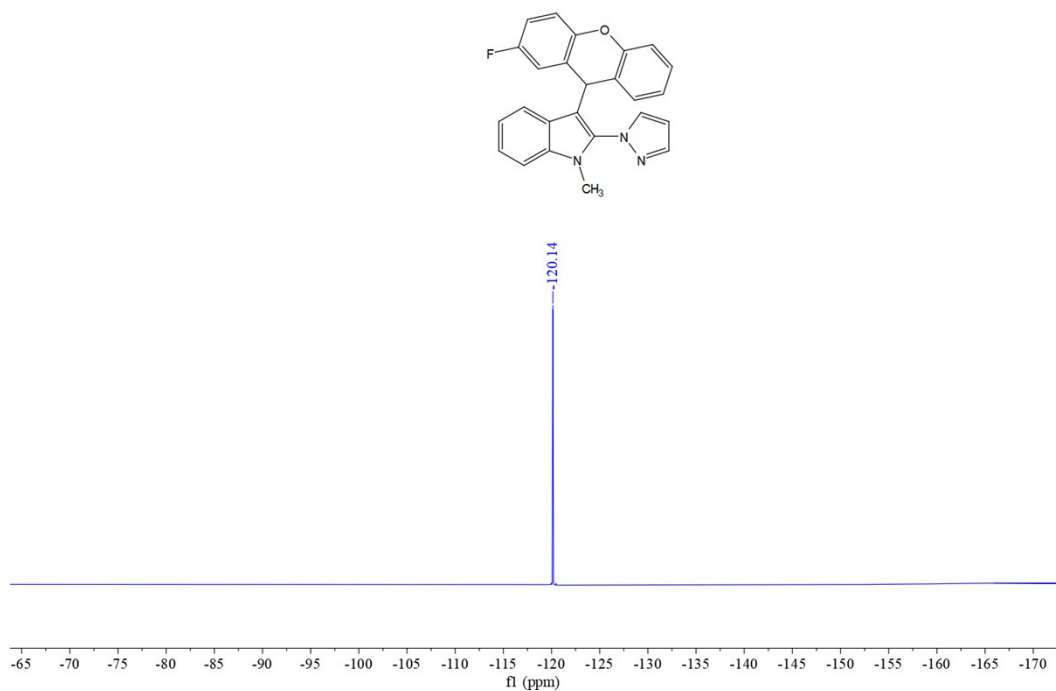

(50)  $^1\text{H}$ -NMR (500 MHz,  $\text{CDCl}_3$ ) spectrum of 4aea

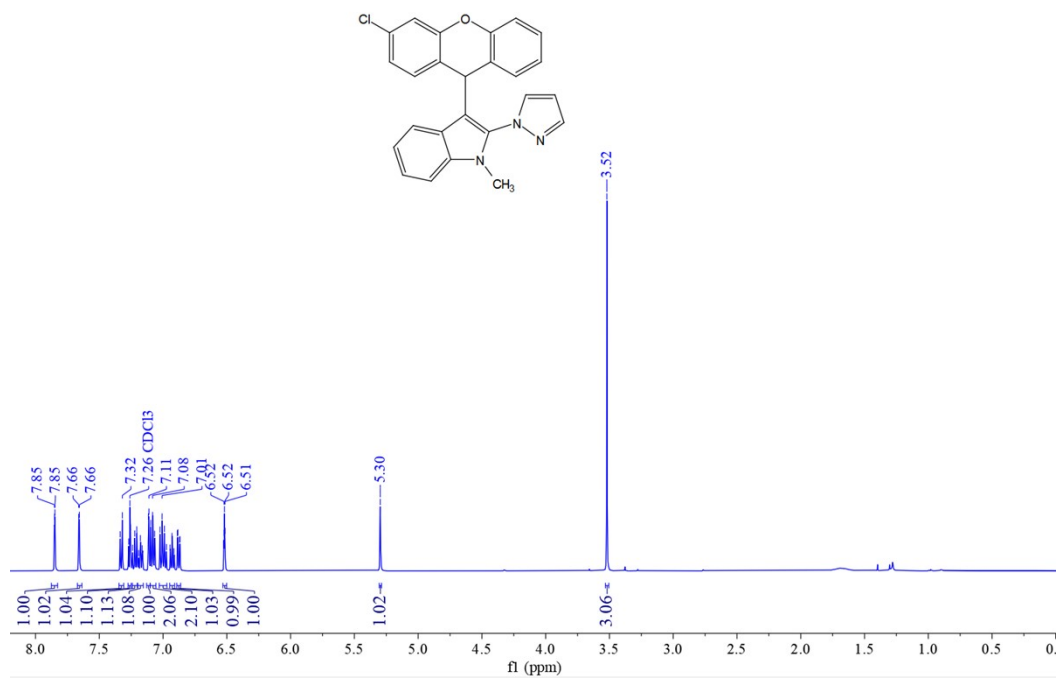

**(51)  $^{13}\text{C}$ -NMR (125 MHz,  $\text{CDCl}_3$ ) spectrum of 4aea**

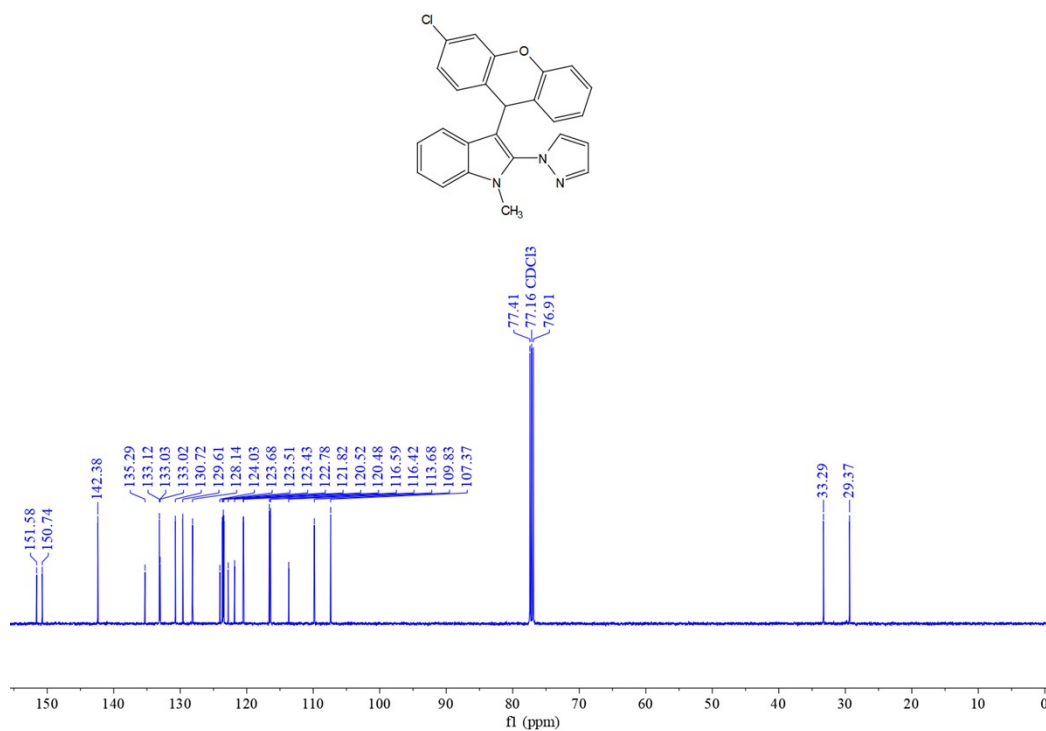

**(52)  $^1\text{H}$ -NMR (500 MHz,  $\text{CDCl}_3$ ) spectrum of 4afa**

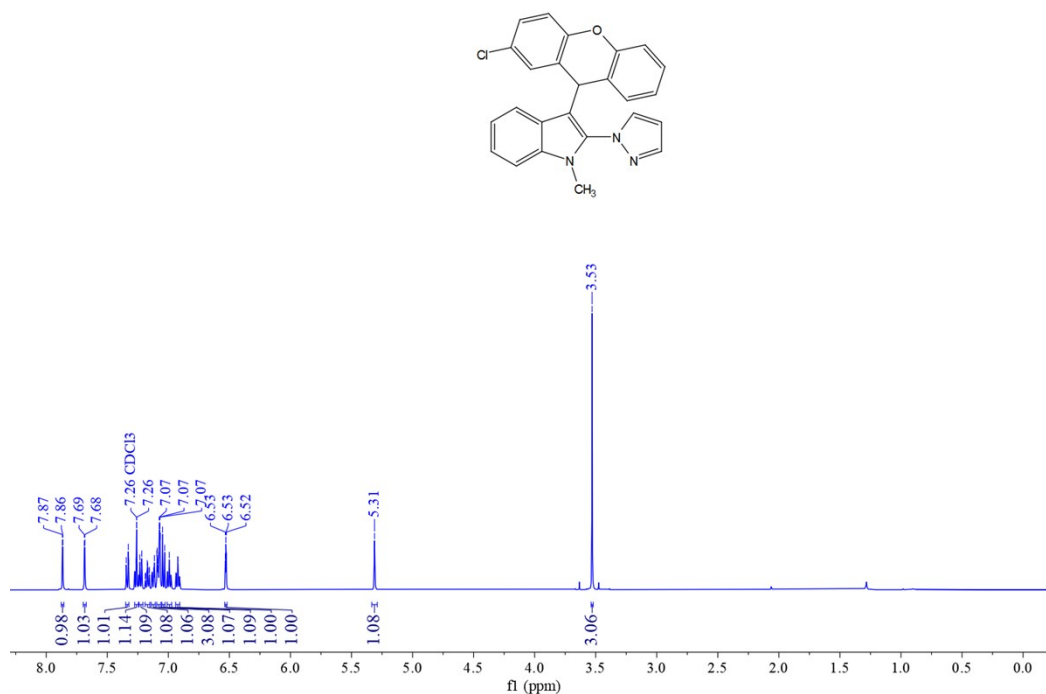

(53)  $^{13}\text{C}$ -NMR (125 MHz,  $\text{CDCl}_3$ ) spectrum of 4afa

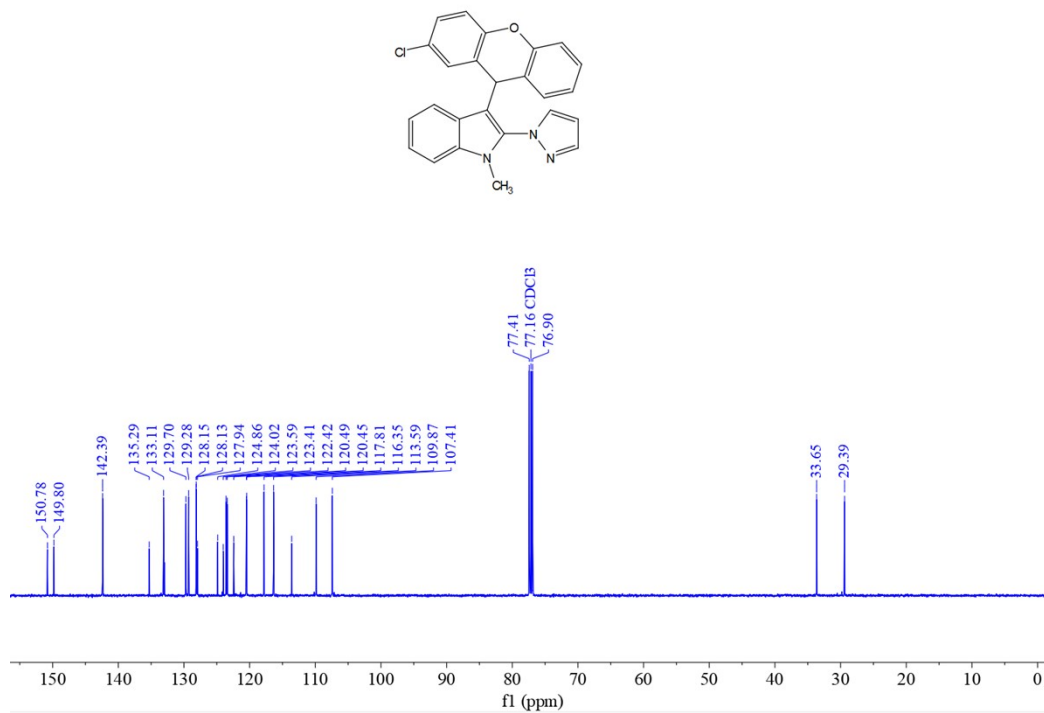

(54)  $^1\text{H}$ -NMR (500 MHz,  $\text{CDCl}_3$ ) spectrum of 4aga

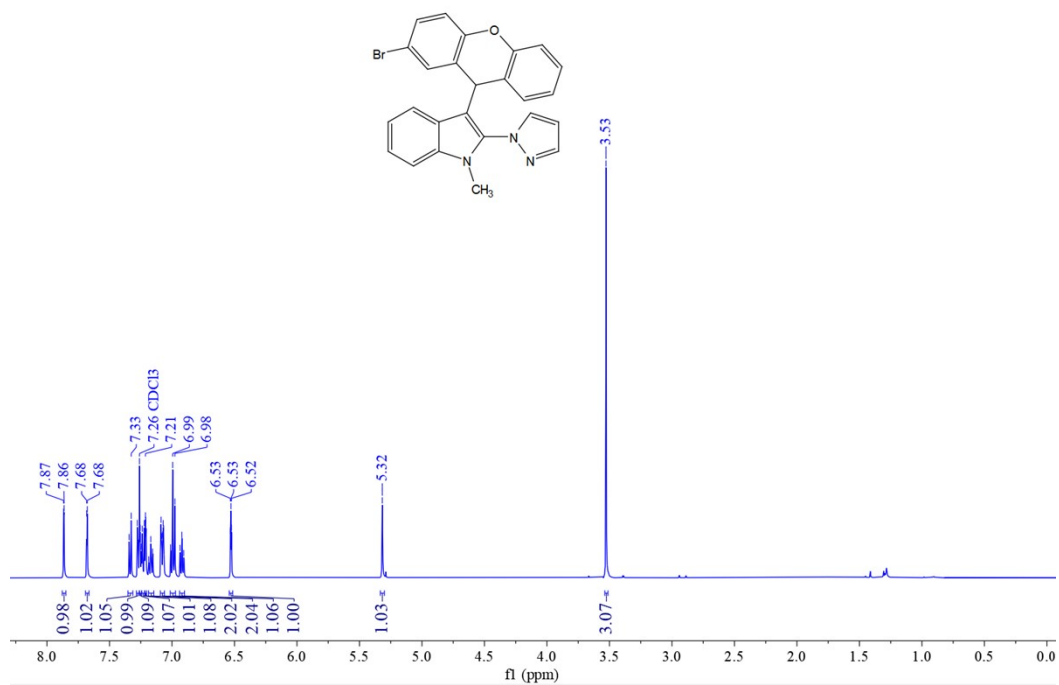

(55)  $^{13}\text{C}$ -NMR (125 MHz,  $\text{CDCl}_3$ ) spectrum of 4aga

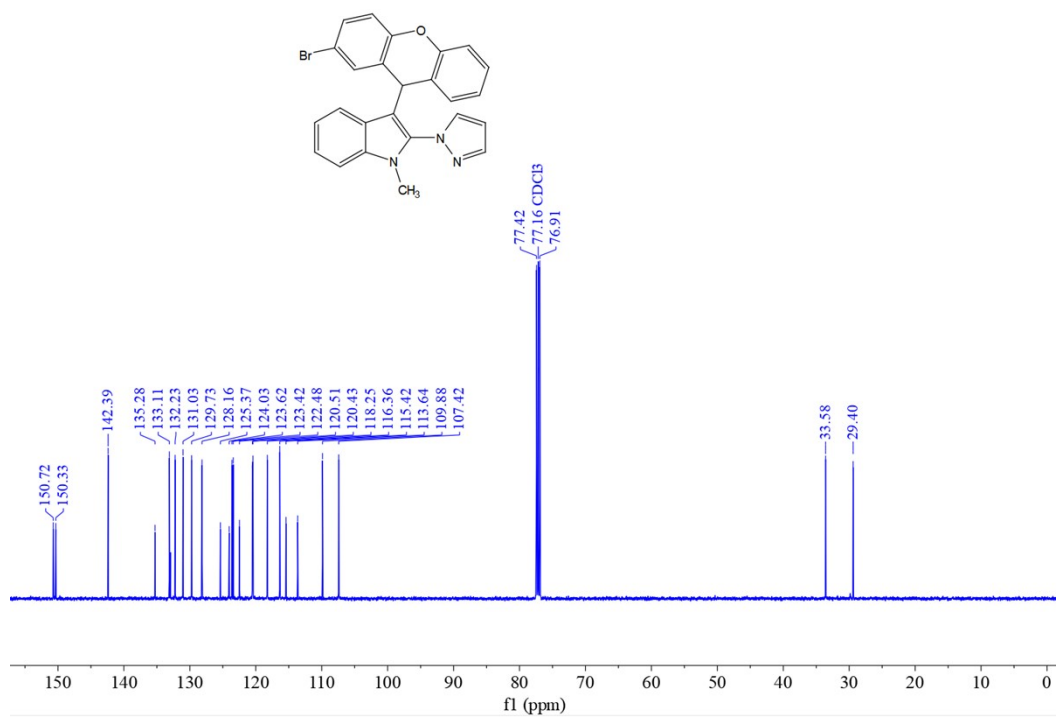

(56)  $^1\text{H}$ -NMR (500 MHz,  $\text{CDCl}_3$ ) spectrum of 4aha

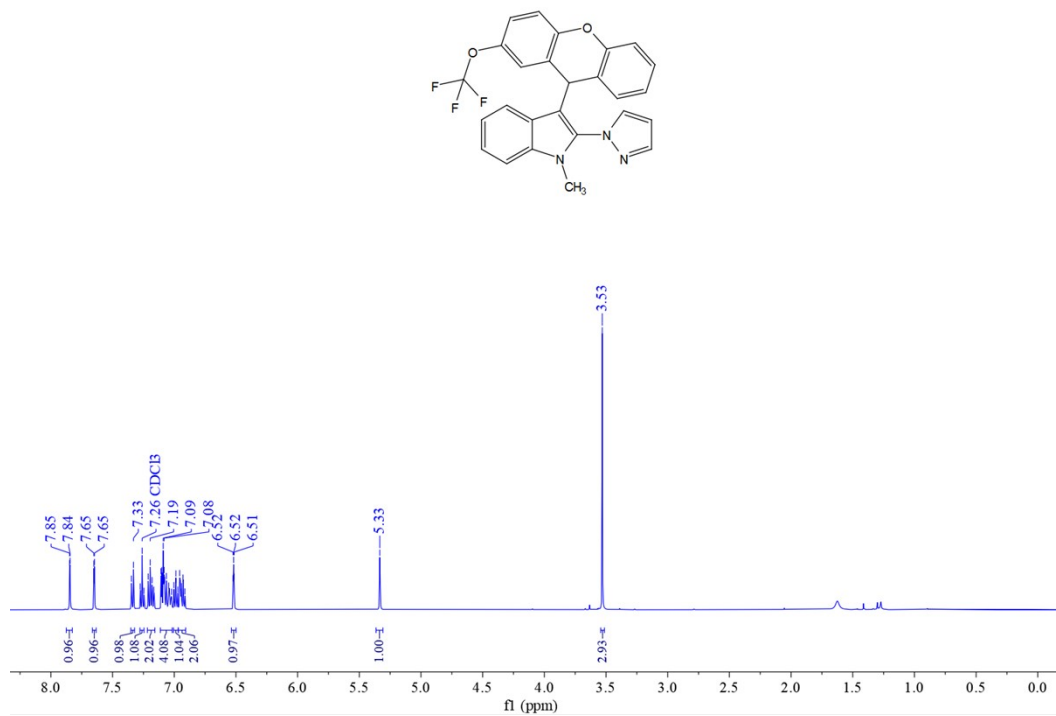

(57)  $^{13}\text{C}$ -NMR (125 MHz,  $\text{CDCl}_3$ ) spectrum of 4aha

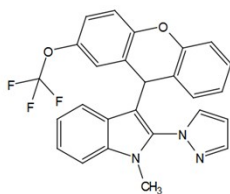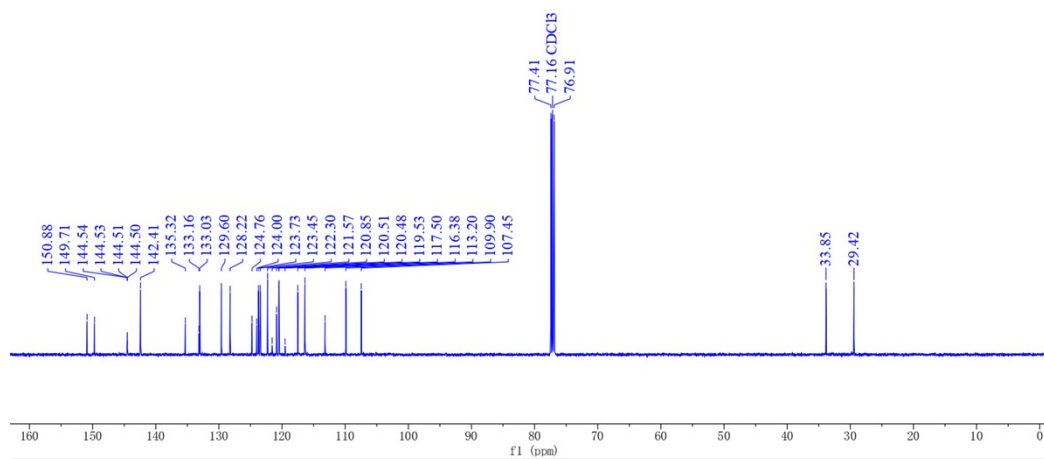

(58)  $^{19}\text{F}$ -NMR (470 MHz,  $\text{CDCl}_3$ ) spectrum of 4aha

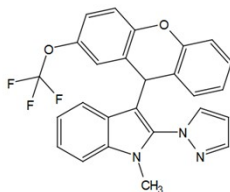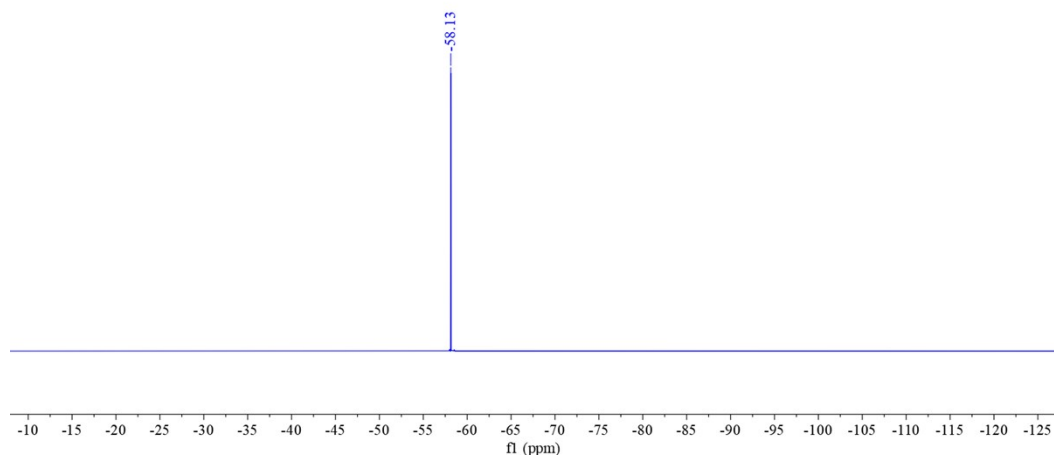

(59)  $^1\text{H-NMR}$  (500 MHz,  $\text{CDCl}_3$ ) spectrum of 4aia

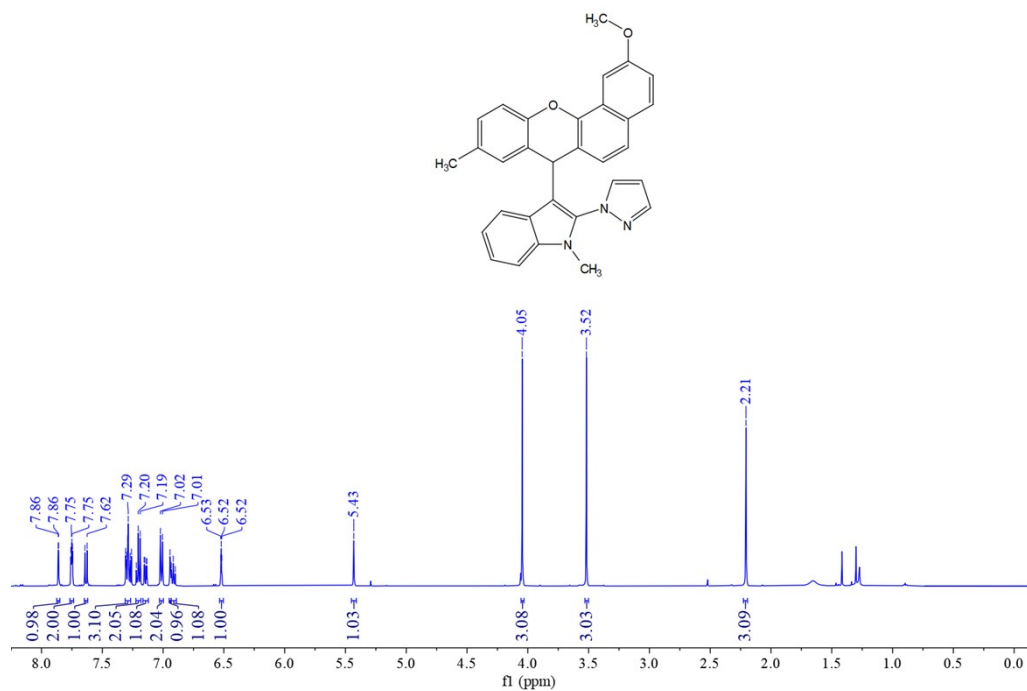

(60)  $^{13}\text{C-NMR}$  (125 MHz,  $\text{CDCl}_3$ ) spectrum of 4aia

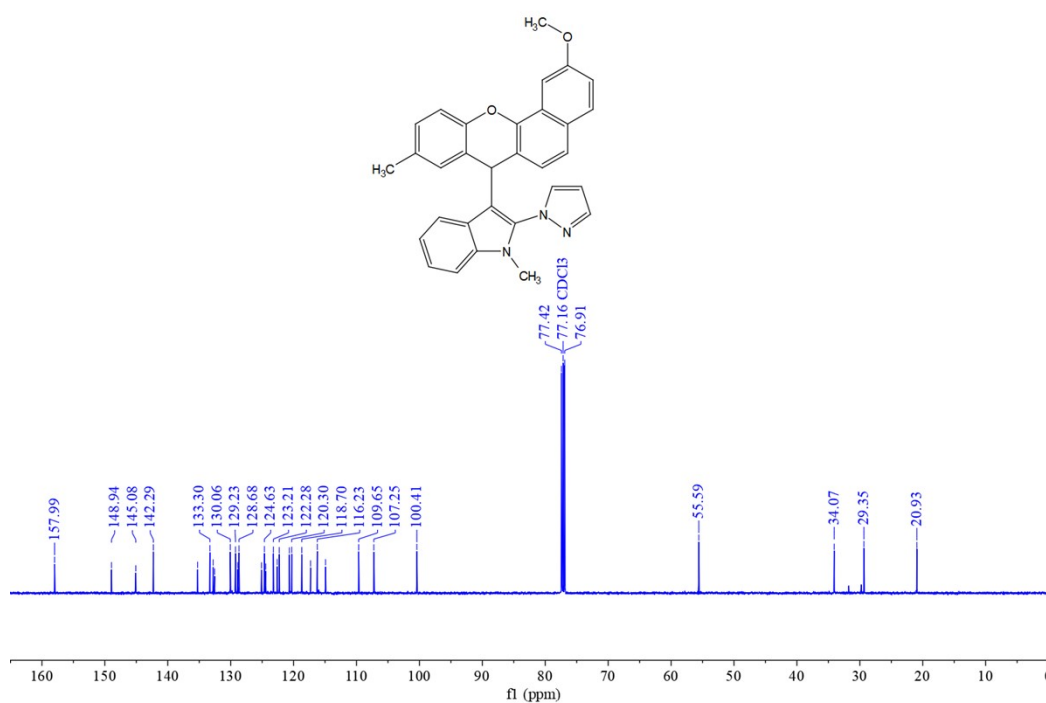

**(61)  $^1\text{H-NMR}$  (500 MHz,  $\text{CDCl}_3$ ) spectrum of 4aab**

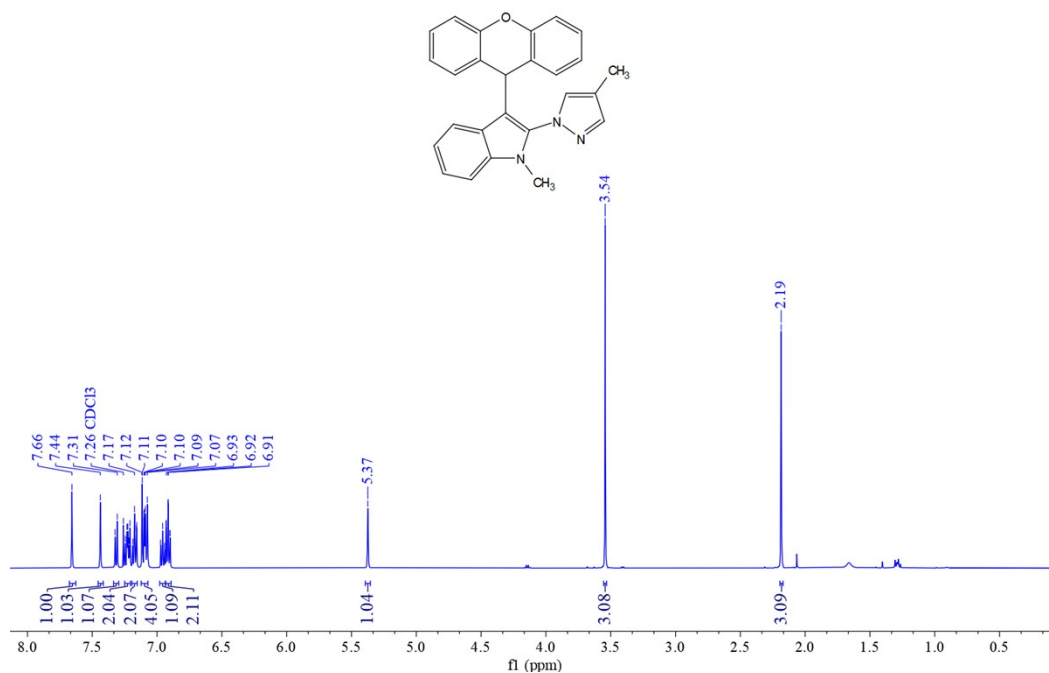

**(62)  $^{13}\text{C-NMR}$  (125 MHz,  $\text{CDCl}_3$ ) spectrum of 4aab**

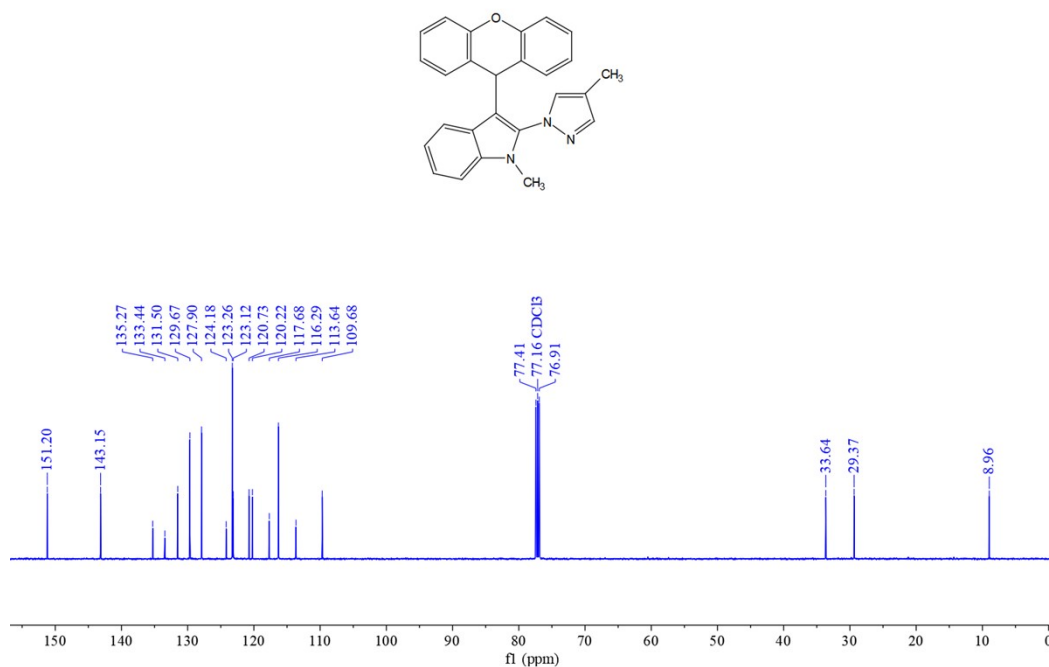

(63)  $^1\text{H-NMR}$  (500 MHz,  $\text{CDCl}_3$ ) spectrum of 4aac

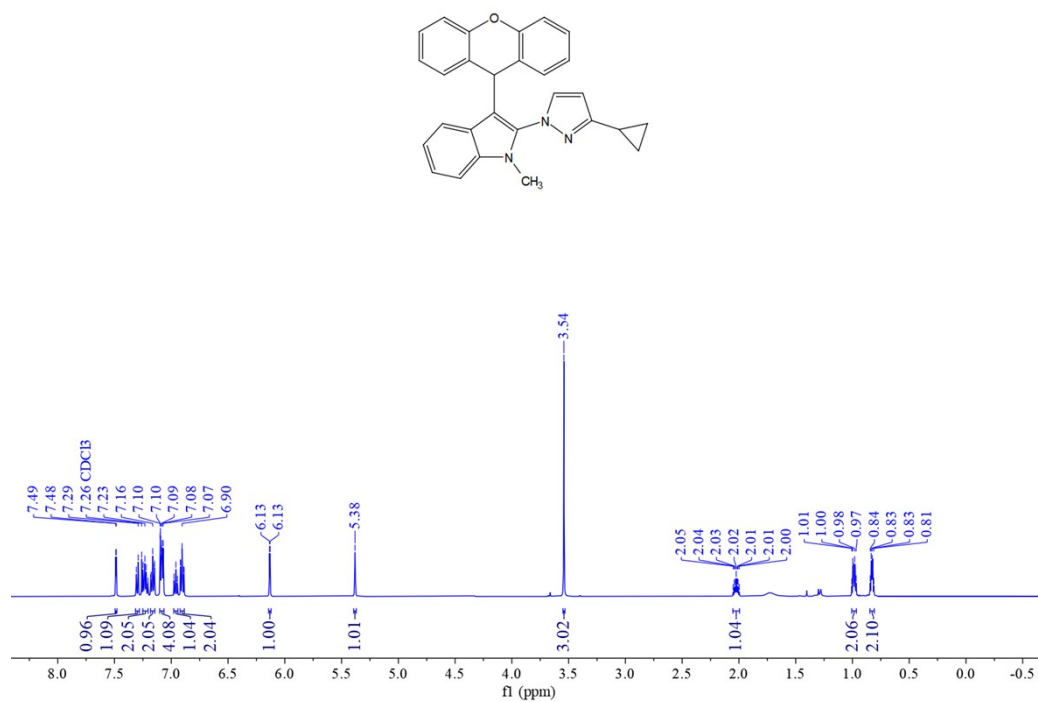

(64)  $^{13}\text{C-NMR}$  (125 MHz,  $\text{CDCl}_3$ ) spectrum of 4aac

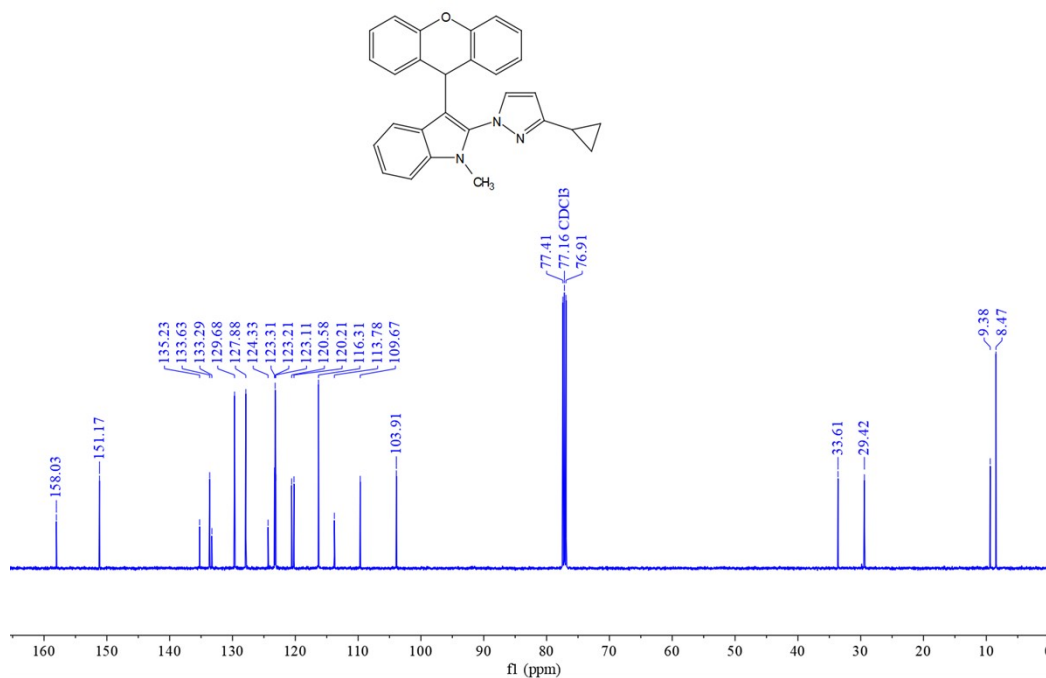



(65) <sup>1</sup>H-NMR (500 MHz, CDCl<sub>3</sub>) spectrum of 4aad

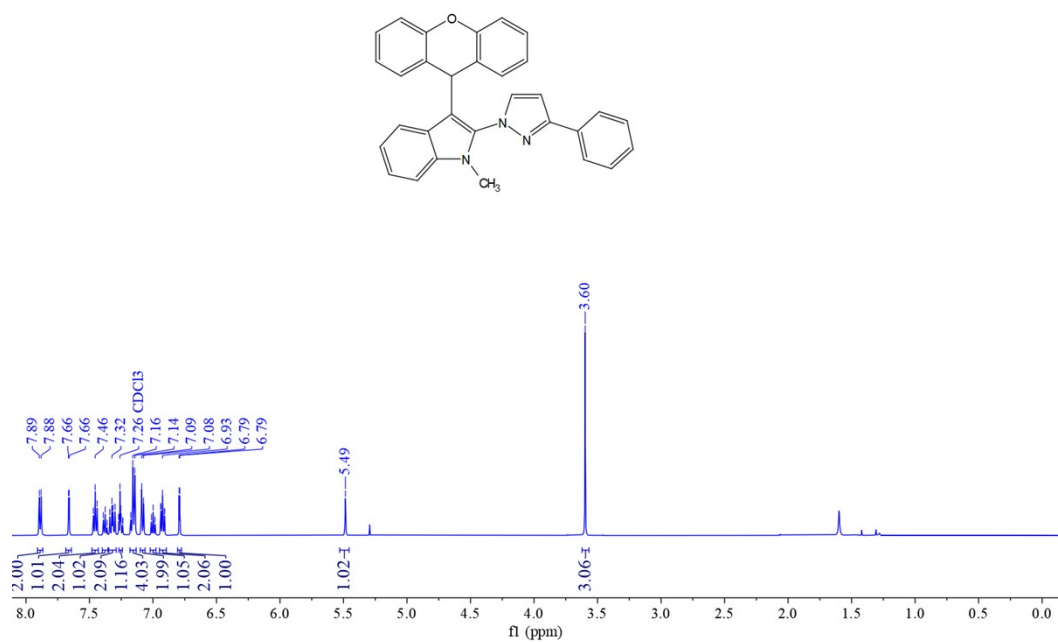

(66) <sup>13</sup>C-NMR (125 MHz, CDCl<sub>3</sub>) spectrum of 4aad

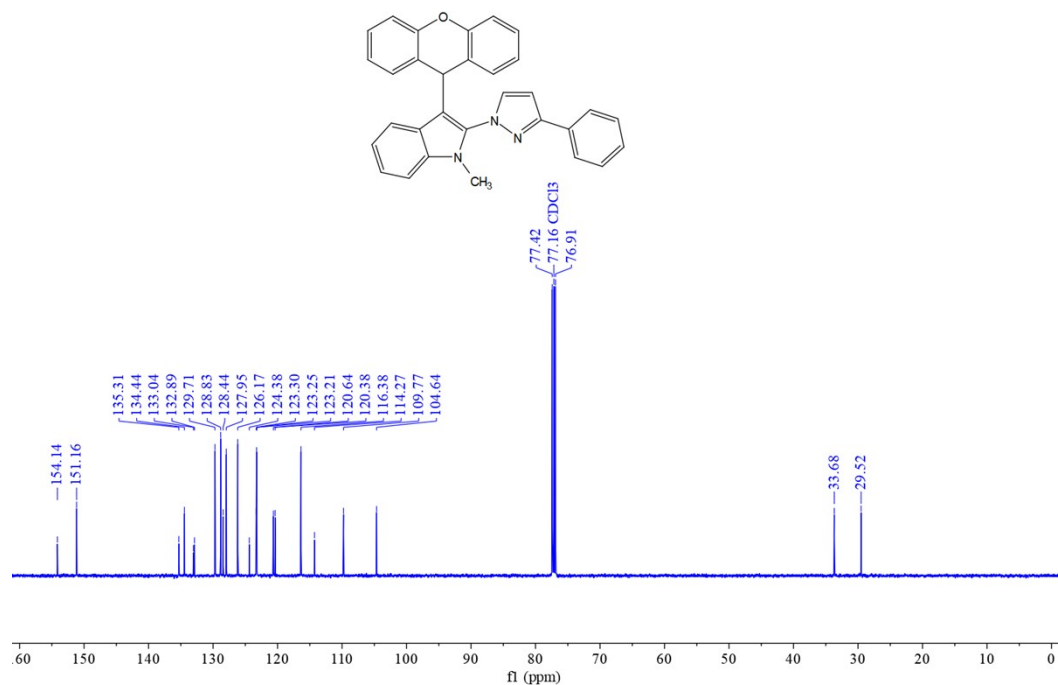

(67)  $^1\text{H-NMR}$  (500 MHz,  $\text{CDCl}_3$ ) spectrum of 4aae

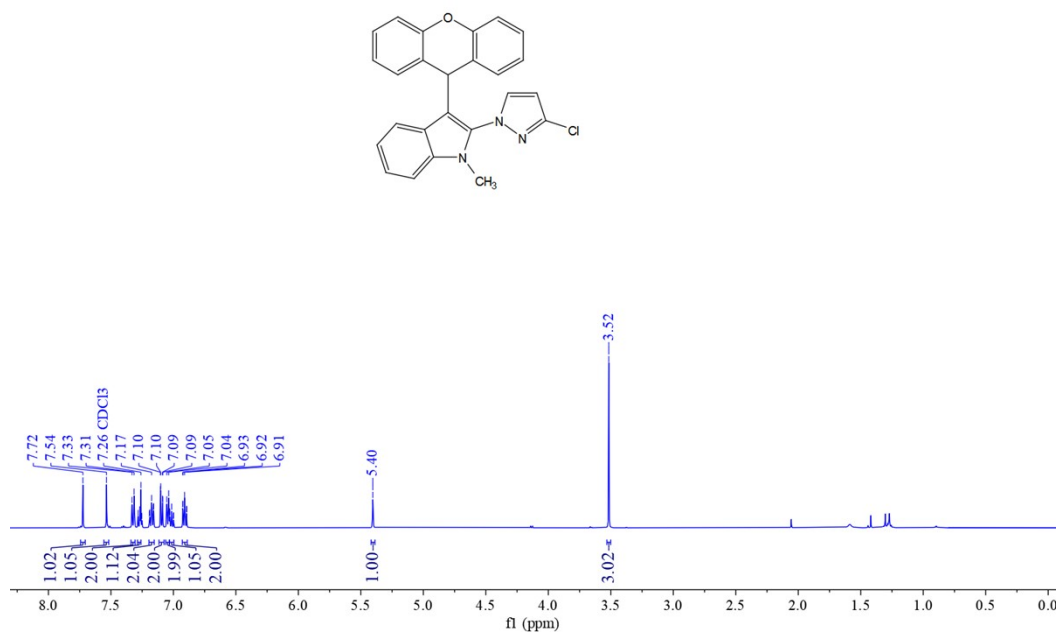

(68)  $^{13}\text{C-NMR}$  (125 MHz,  $\text{CDCl}_3$ ) spectrum of 4aae

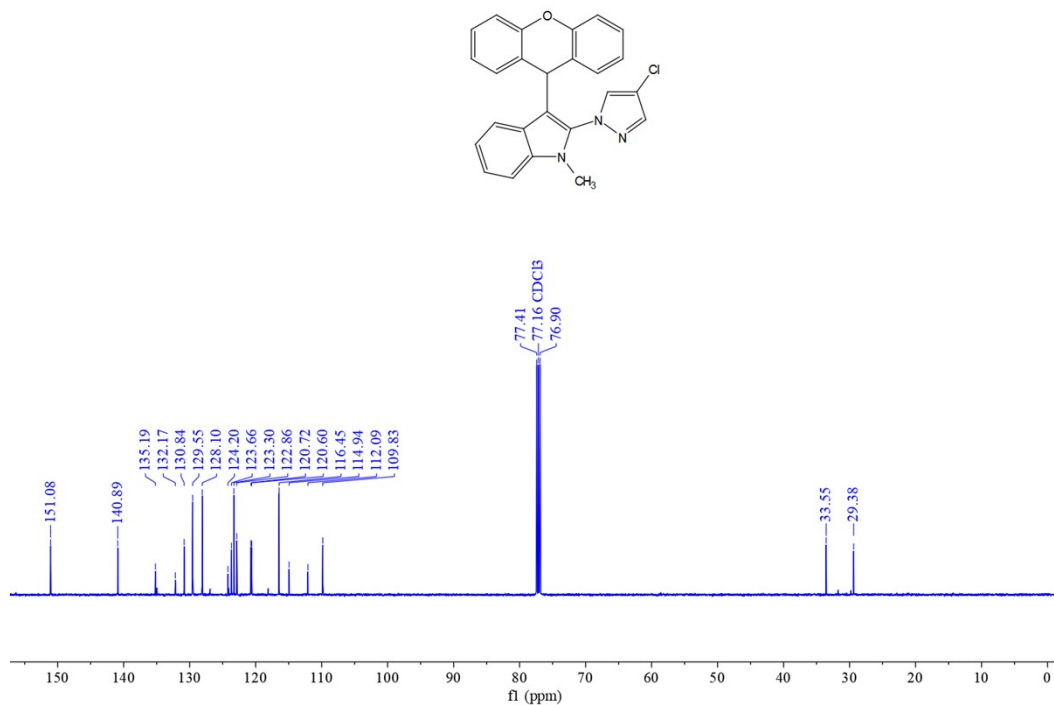

(69)  $^1\text{H-NMR}$  (500 MHz,  $\text{CDCl}_3$ ) spectrum of 4aaf

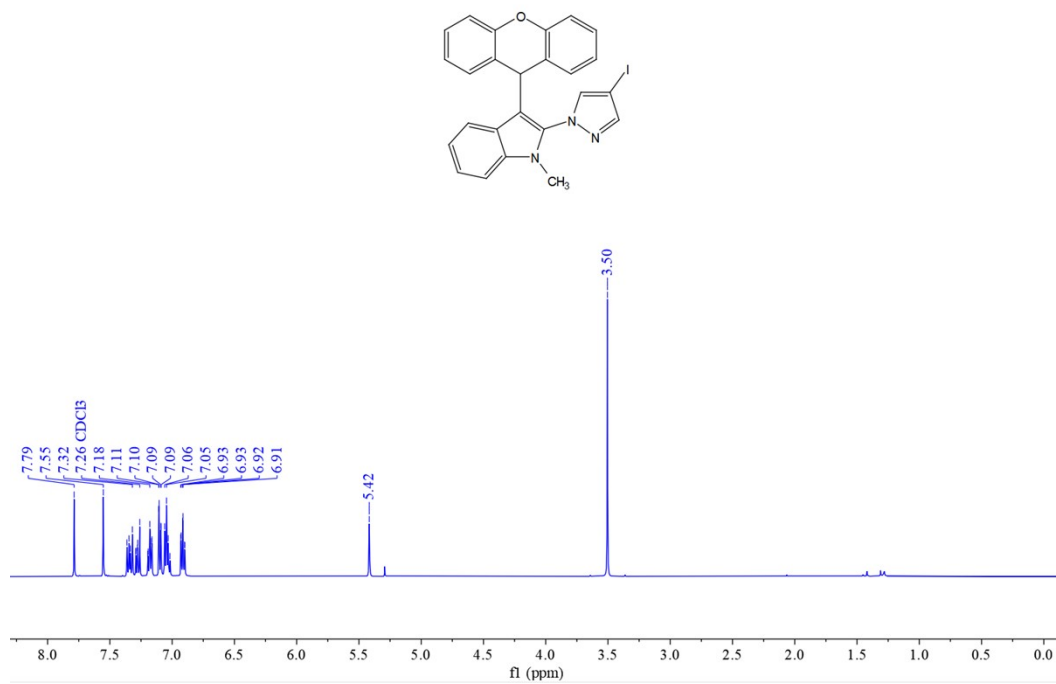

(70)  $^{13}\text{C-NMR}$  (125 MHz,  $\text{CDCl}_3$ ) spectrum of 4aaf

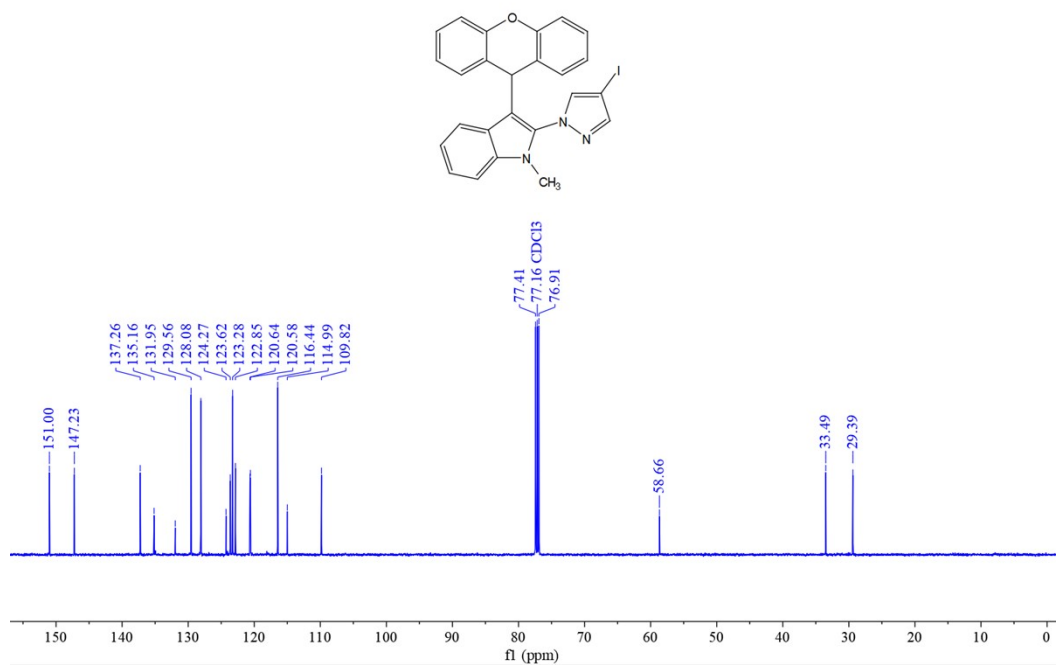

(71) <sup>1</sup>H-NMR (500 MHz, CDCl<sub>3</sub>) spectrum of 4aag

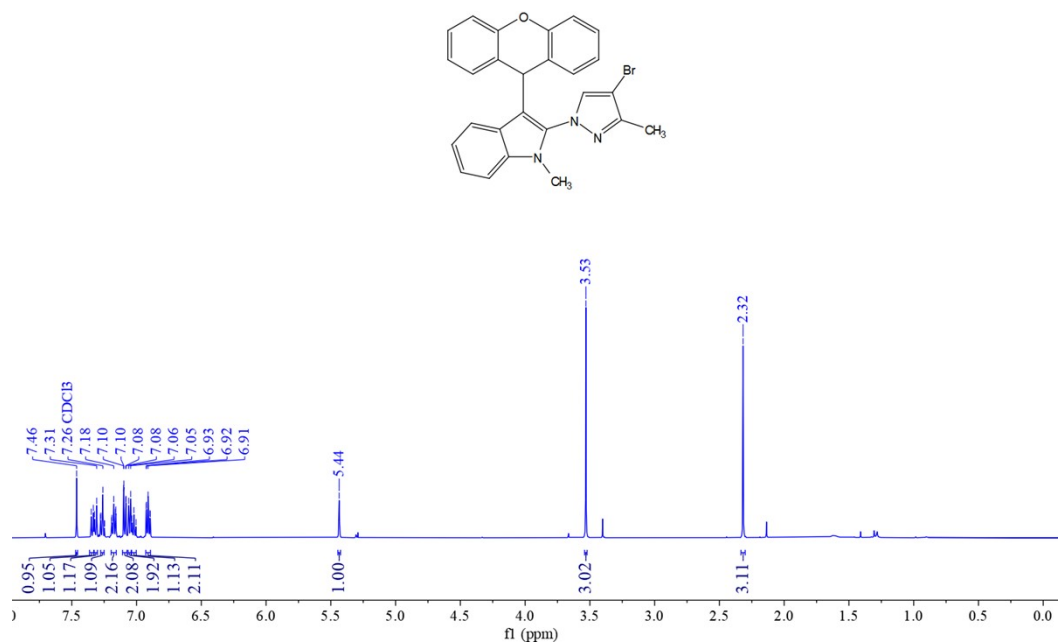

(72) <sup>13</sup>C-NMR (125 MHz, CDCl<sub>3</sub>) spectrum of 4aag

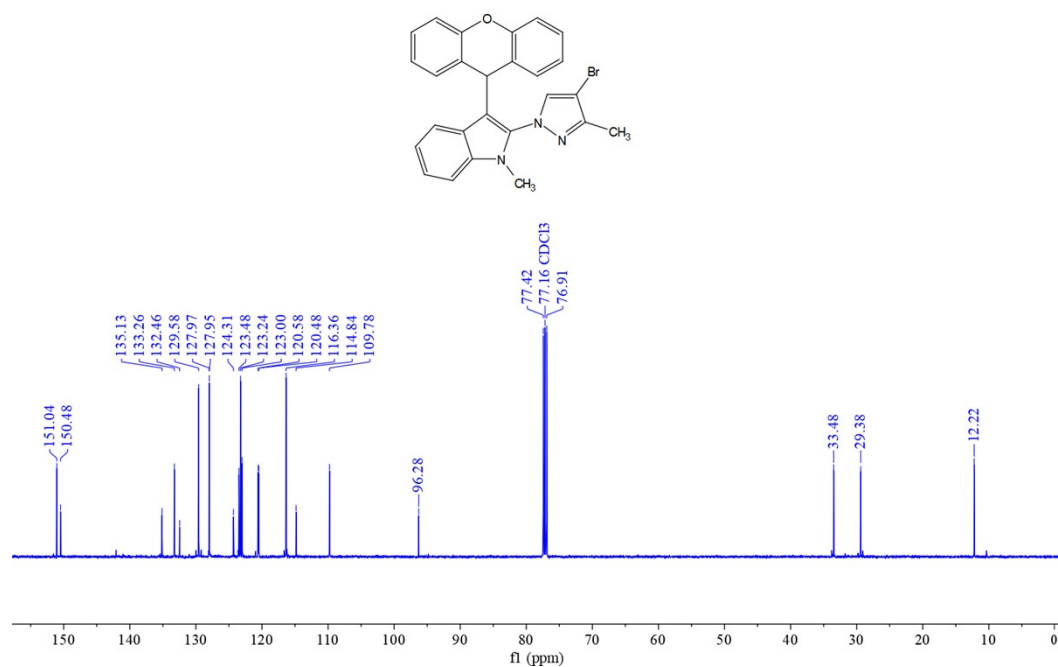

(73) <sup>1</sup>H-NMR (500 MHz, CDCl<sub>3</sub>) spectrum of 4aah

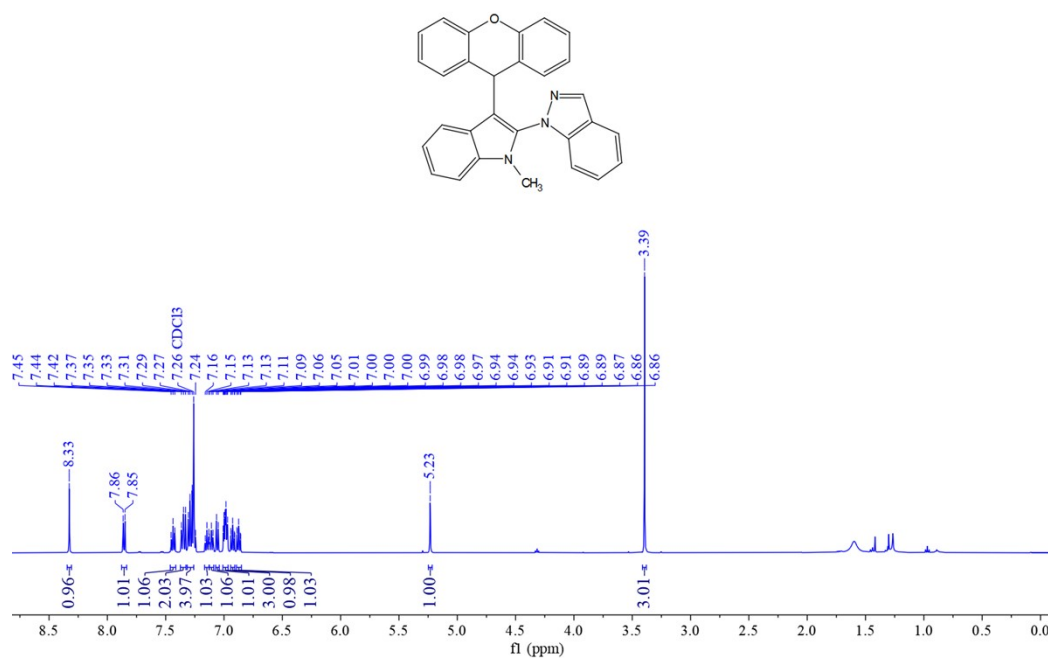

(74) <sup>13</sup>C-NMR (125 MHz, CDCl<sub>3</sub>) spectrum of 4aah

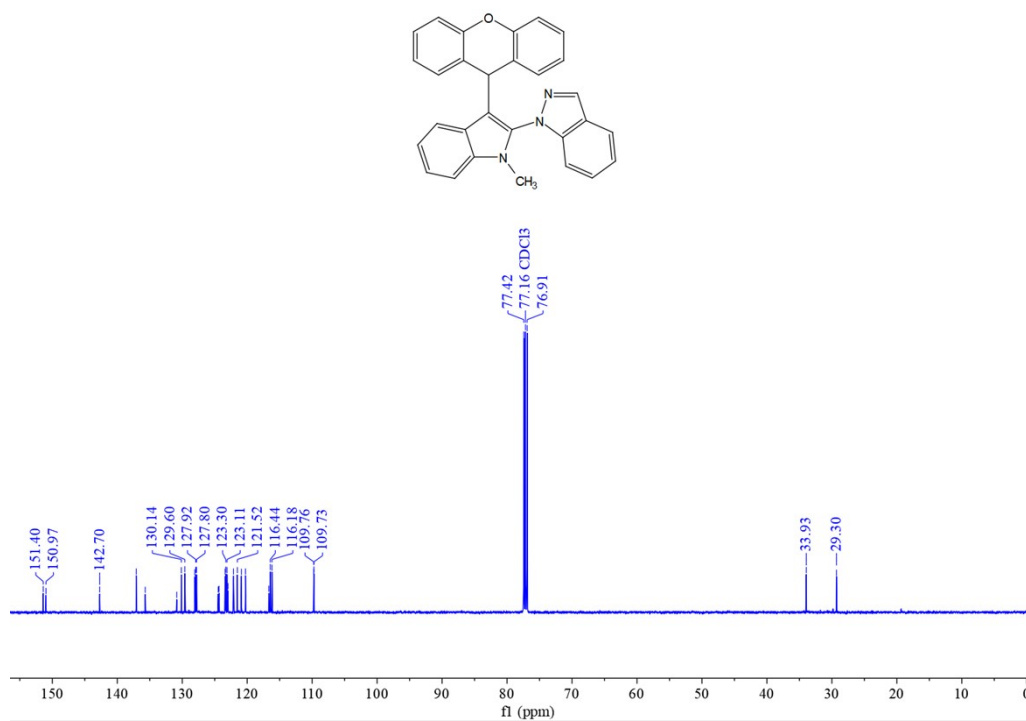

(75)  $^1\text{H-NMR}$  (500 MHz,  $\text{CDCl}_3$ ) spectrum of 4aai

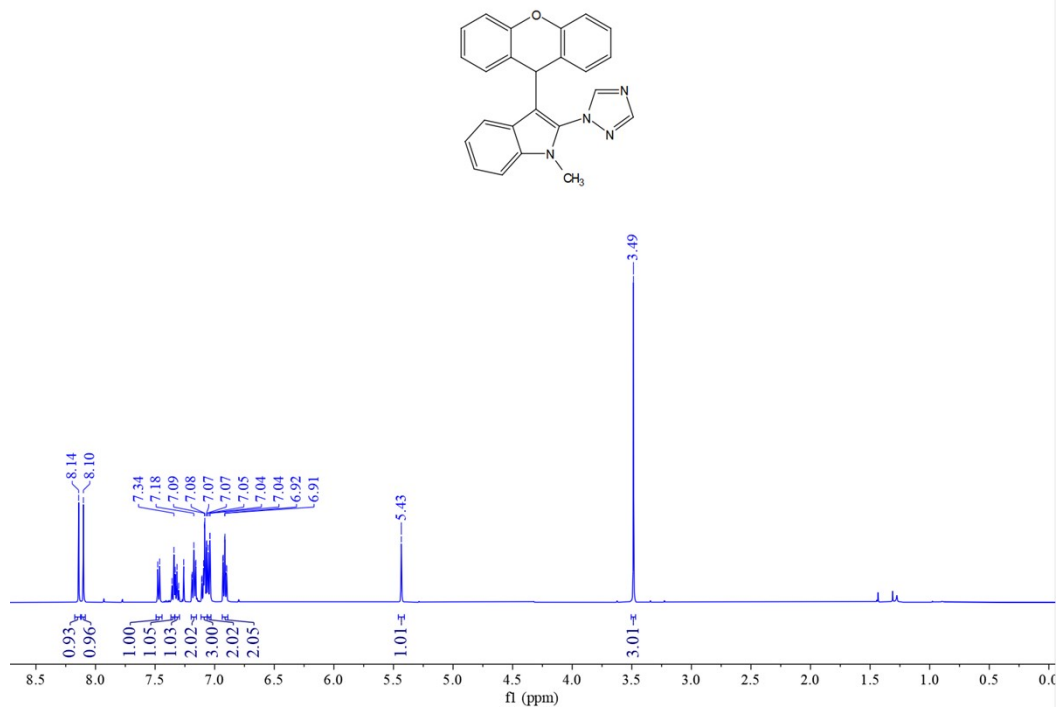

(76)  $^{13}\text{C-NMR}$  (125 MHz,  $\text{CDCl}_3$ ) spectrum of 4aai

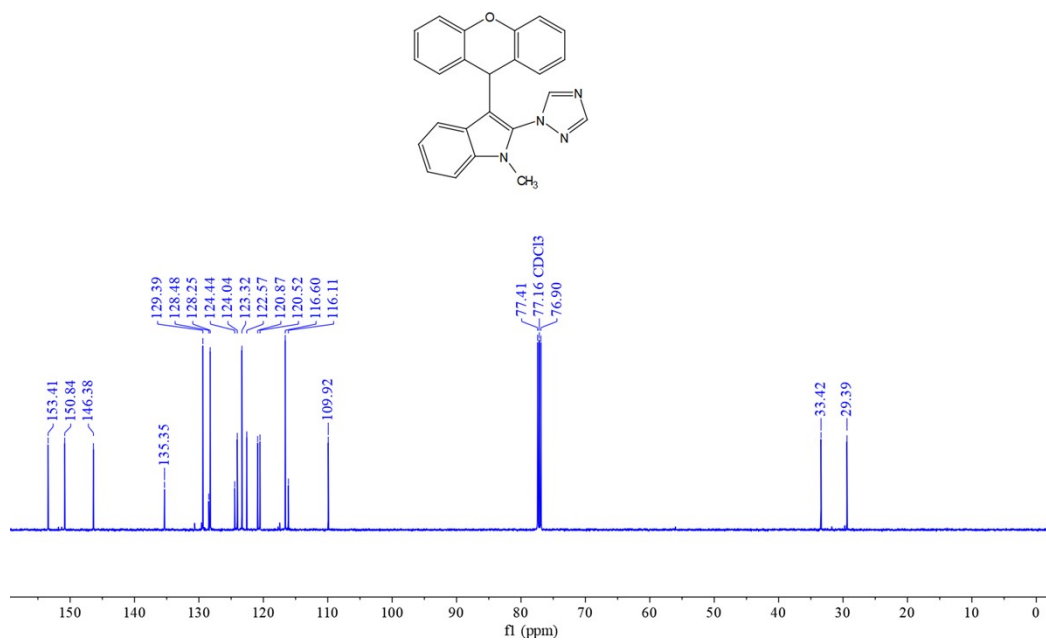

(77)  $^1\text{H-NMR}$  (500 MHz,  $\text{CDCl}_3$ ) spectrum of 4saa

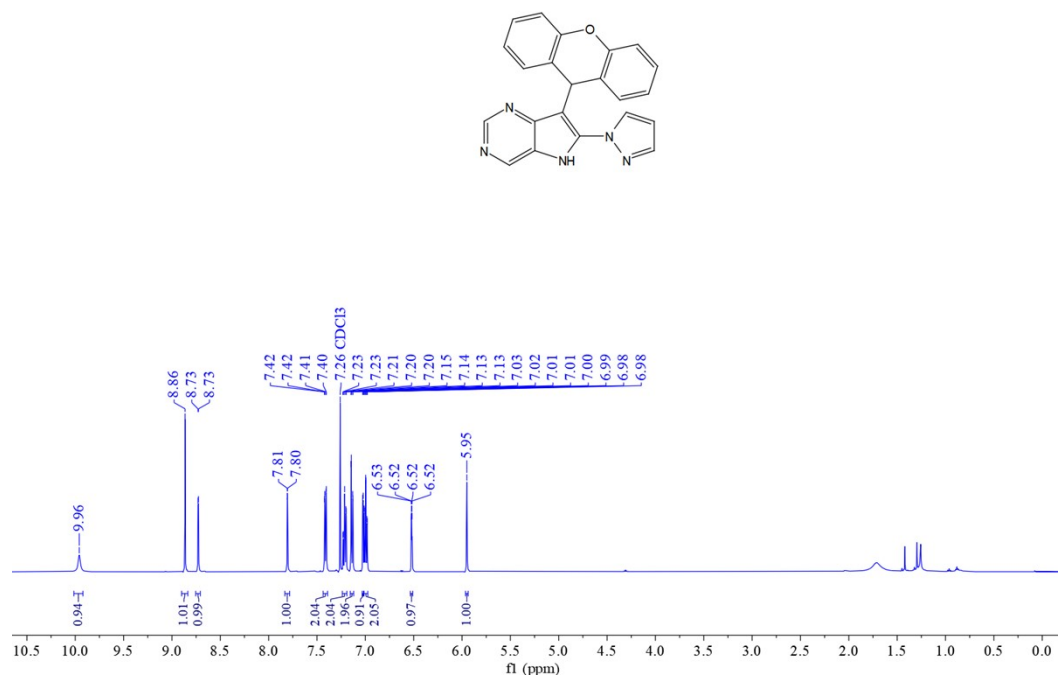

(78)  $^{13}\text{C-NMR}$  (125 MHz,  $\text{CDCl}_3$ ) spectrum of 4saa

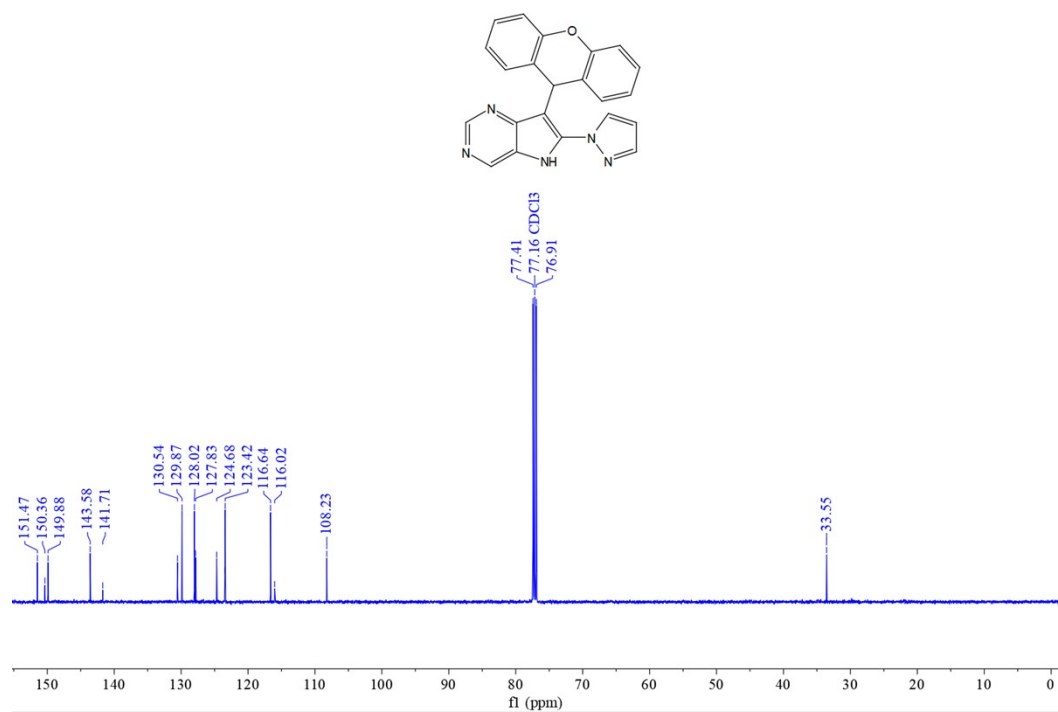

(79)  $^1\text{H-NMR}$  (500 MHz,  $\text{CDCl}_3$ ) spectrum of 4aja

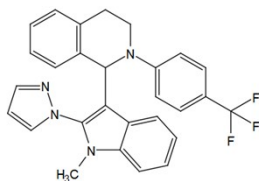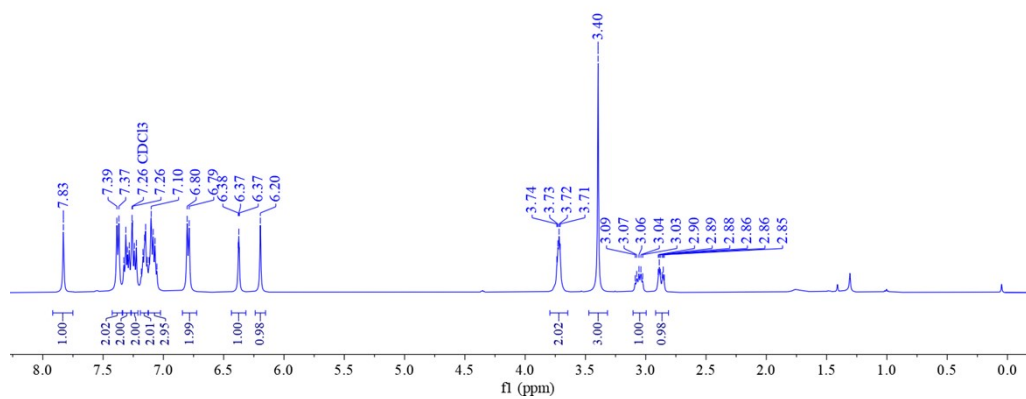

(80)  $^{13}\text{C-NMR}$  (125 MHz,  $\text{CDCl}_3$ ) spectrum of 4aja

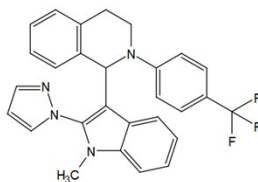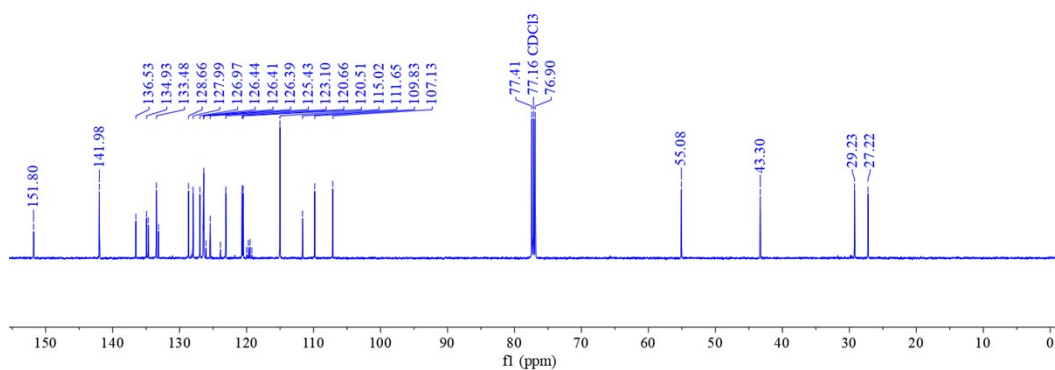



(81)  $^{19}\text{F}$ -NMR (470 MHz,  $\text{CDCl}_3$ ) spectrum of 4aja

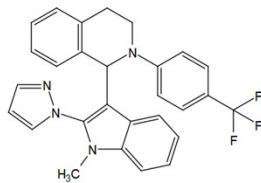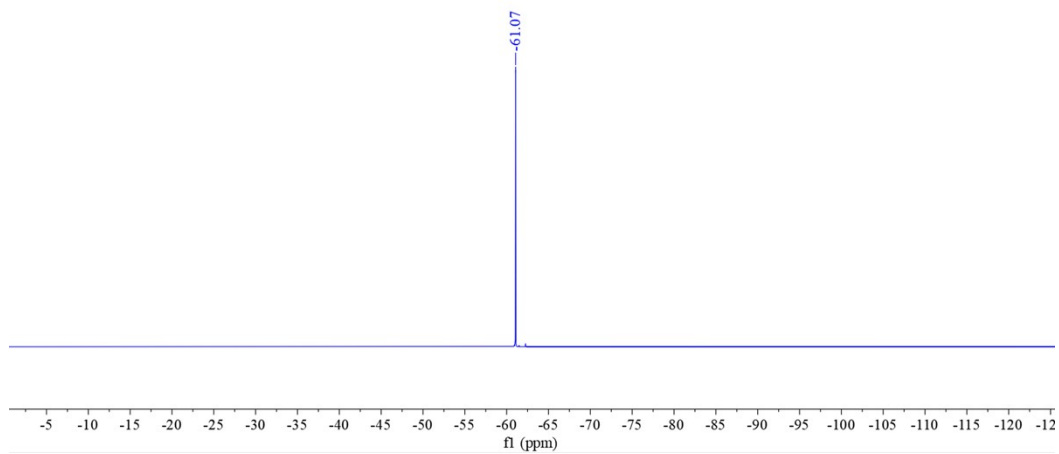

Supplement: d2qo01329k1.pdf [file d2qo01329k1.pdf]
